# Supplementary material
Source: PubMed Central journal article supplement (PMC4836378)
Supplement: NIHMS774586-supplement-supplemental_data.pdf [file NIHMS774586-supplement-supplemental_data.pdf]

# Supporting information

## Development and characterization of novel and selective inhibitors of cytochrome P450 CYP26A1, the human liver retinoic acid hydroxylase

Philippe Diaz<sup>\*,§,δ</sup>, Weize Huang<sup>‡</sup>, Charles M. Keyari<sup>§</sup>, Brian Buttrick<sup>‡</sup>, Lauren Price<sup>‡</sup>, Nicolas Guilloteau<sup>δ</sup>, Sasmita Tripathy<sup>‡</sup>, Vanessa G. Sperandio<sup>§</sup>, Frank R. Fronczek<sup>€</sup>, Fanny Astruc-Diaz<sup>δ</sup>, Nina Isoherranen<sup>\*‡</sup>

<sup>‡</sup>Department of Pharmaceutics, University of Washington, Seattle, WA98195

<sup>§</sup> Department of Biomedical and Pharmaceutical Sciences, The University of Montana, 32 Campus Drive, Missoula, MT 59812, USA

<sup>€</sup>Chemistry Department, Louisiana State University, 612 Choppin Hall, Baton Rouge, LA 70803, USA

<sup>δ</sup>DermaXon LLC, 32 Campus Drive, Missoula, MT 59812, USA

## Table of Contents

|                                                                                                    |     |
|----------------------------------------------------------------------------------------------------|-----|
| 500 MHz $^1\text{H}$ -NMR of compound 4 in $\text{CDCl}_3$ .....                                   | S4  |
| 125 MHz $^{13}\text{C}$ -NMR of compound 4 in $\text{CDCl}_3$ .....                                | S5  |
| 400 MHz $^1\text{H}$ -NMR of compound 5 in $\text{CDCl}_3$ .....                                   | S6  |
| 100 MHz $^{13}\text{C}$ -NMR of compound 5 in $\text{CDCl}_3$ .....                                | S7  |
| 400 MHz $^1\text{H}$ -NMR of compound 6 in $\text{CDCl}_3$ .....                                   | S8  |
| 100 MHz $^{13}\text{C}$ -NMR of compound 6 in $\text{CDCl}_3$ .....                                | S9  |
| 500 MHz $^1\text{H}$ -NMR of compound 7 in $\text{CDCl}_3$ .....                                   | S10 |
| 100 MHz $^{13}\text{C}$ -NMR of compound 7 in $\text{CDCl}_3$ .....                                | S11 |
| 500 MHz $^1\text{H}$ -NMR of Compound 8 in $\text{CDCl}_3$ .....                                   | S12 |
| 125 MHz $^{13}\text{C}$ -NMR of compound 8 in $\text{CDCl}_3$ .....                                | S13 |
| 500 MHz $^1\text{H}$ -NMR of compound 9 in $\text{CDCl}_3/\text{CD}_3\text{OD}$ .....              | S14 |
| 125 MHz $^{13}\text{C}$ -NMR of compound 9 in $\text{CDCl}_3/\text{CD}_3\text{OD}$ .....           | S15 |
| 400 MHz $^1\text{H}$ -NMR of compound 10a in $\text{CDCl}_3$ .....                                 | S16 |
| 100 MHz $^{13}\text{C}$ -NMR of compound 10a in $\text{CDCl}_3$ .....                              | S17 |
| 400 MHz $^1\text{H}$ -NMR of compound 11a in $\text{CDCl}_3$ .....                                 | S18 |
| 100 MHz $^{13}\text{C}$ -NMR of compound 11a in $\text{CDCl}_3$ .....                              | S19 |
| 400 MHz $^1\text{H}$ -NMR of compound 12a in $\text{CDCl}_3$ .....                                 | S20 |
| 100 MHz $^{13}\text{C}$ -NMR of compound 12a in $\text{CDCl}_3$ .....                              | S21 |
| 400 MHz $^1\text{H}$ -NMR of compound 13a in $\text{CDCl}_3$ .....                                 | S22 |
| 100 MHz $^{13}\text{C}$ -NMR of compound 13a in $\text{CDCl}_3$ .....                              | S23 |
| 400 MHz $^1\text{H}$ -NMR of compound 14a in $\text{CDCl}_3$ .....                                 | S24 |
| 100 MHz $^{13}\text{C}$ -NMR of compound 14a in $\text{CDCl}_3$ .....                              | S25 |
| 400 MHz $^1\text{H}$ -NMR of compound 15a in $\text{CDCl}_3$ .....                                 | S26 |
| 100 MHz $^{13}\text{C}$ -NMR of compound 15a in $\text{CDCl}_3$ .....                              | S27 |
| 400 MHz $^1\text{H}$ -NMR of compound 10b in $\text{CDCl}_3$ .....                                 | S28 |
| 100 MHz $^{13}\text{C}$ -NMR of compound 10b in $\text{CDCl}_3$ .....                              | S29 |
| 400 MHz $^1\text{H}$ -NMR of compound 11b in $\text{CDCl}_3/\text{CD}_3\text{OD}$ mixture .....    | S30 |
| 100 MHz $^{13}\text{C}$ -NMR of compound 11b in $\text{CDCl}_3/\text{CD}_3\text{OD}$ mixture ..... | S31 |
| 400 MHz $^1\text{H}$ -NMR of compound 12b in $\text{CDCl}_3$ .....                                 | S32 |
| 100 MHz $^{13}\text{C}$ -NMR of compound 12b in $\text{CDCl}_3$ .....                              | S33 |
| 400 MHz $^1\text{H}$ -NMR of compound 13b in $\text{CDCl}_3$ .....                                 | S34 |
| 100 MHz $^{13}\text{C}$ -NMR of compound 13b in $\text{CDCl}_3$ .....                              | S35 |
| 400 MHz $^1\text{H}$ -NMR of compound 14b in $\text{CDCl}_3$ .....                                 | S36 |
| 100 MHz $^{13}\text{C}$ -NMR of compound 14b in $\text{CDCl}_3$ .....                              | S37 |
| 400 MHz $^1\text{H}$ -NMR of compound 15b in $\text{DMSO}-\text{D}_6$ .....                        | S38 |
| 100 MHz $^{13}\text{C}$ -NMR of compound 15b in $\text{DMSO}-\text{D}_6$ .....                     | S39 |
| 400 MHz $^1\text{H}$ -NMR of compound 16 in $\text{CDCl}_3$ .....                                  | S40 |
| 100 MHz $^{13}\text{C}$ -NMR of compound 16 in $\text{CDCl}_3$ .....                               | S41 |
| 400 MHz $^1\text{H}$ -NMR of compound 17 in $\text{CDCl}_3$ .....                                  | S42 |
| 100 MHz $^{13}\text{C}$ -NMR of compound 17 in $\text{CDCl}_3$ .....                               | S43 |
| 400 MHz $^1\text{H}$ -NMR of compound 18 in $\text{CDCl}_3$ .....                                  | S44 |
| 100 MHz $^{13}\text{C}$ -NMR of compound 18 in $\text{CDCl}_3$ .....                               | S45 |
| 400 MHz $^1\text{H}$ -NMR of compound 19 in $\text{CDCl}_3$ .....                                  | S46 |
| 100 MHz $^{13}\text{C}$ -NMR of compound 19 in $\text{CDCl}_3$ .....                               | S47 |
| 400 MHz $^1\text{H}$ -NMR of compound 20 in $\text{CDCl}_3$ .....                                  | S48 |

|                                                                        |     |
|------------------------------------------------------------------------|-----|
| 100 MHz <sup>13</sup> C-NMR of compound 20 in CDCl <sub>3</sub> .....  | S49 |
| 400 MHz <sup>1</sup> H-NMR of compound 21 in CDCl <sub>3</sub> .....   | S50 |
| 100 MHz <sup>13</sup> C-NMR of compound 21 in CDCl <sub>3</sub> .....  | S51 |
| 400 MHz <sup>1</sup> H-NMR of compound 22 in CDCl <sub>3</sub> .....   | S52 |
| 100 MHz <sup>13</sup> C-NMR of compound 22 in CDCl <sub>3</sub> .....  | S53 |
| 400 MHz <sup>1</sup> H-NMR of compound 23 in CDCl <sub>3</sub> .....   | S54 |
| 100 MHz <sup>13</sup> C-NMR of compound 23 in CDCl <sub>3</sub> .....  | S55 |
| 400 MHz <sup>1</sup> H-NMR of compound 24 in CDCl <sub>3</sub> .....   | S56 |
| 100 MHz <sup>13</sup> C-NMR of compound 24 in CDCl <sub>3</sub> .....  | S57 |
| 400 MHz <sup>1</sup> H-NMR of compound 25 in CDCl <sub>3</sub> .....   | S58 |
| 100 MHz <sup>13</sup> C-NMR of compound 25 in CDCl <sub>3</sub> .....  | S59 |
| 400 MHz <sup>1</sup> H-NMR of compound 26 in CDCl <sub>3</sub> .....   | S60 |
| 400 MHz <sup>1</sup> H-NMR of compound 27 in CDCl <sub>3</sub> .....   | S62 |
| 100 MHz <sup>13</sup> C-NMR of compound 27 in CDCl <sub>3</sub> .....  | S63 |
| 400 MHz <sup>1</sup> H-NMR of compound 28 in CDCl <sub>3</sub> .....   | S64 |
| 100 MHz <sup>13</sup> C-NMR of compound 28 in CDCl <sub>3</sub> .....  | S65 |
| 400 MHz <sup>1</sup> H-NMR of compound 29 in CDCl <sub>3</sub> .....   | S66 |
| 100 MHz <sup>13</sup> C-NMR of compound 29 in CDCl <sub>3</sub> .....  | S67 |
| 400 MHz <sup>1</sup> H-NMR of compound 30 in CDCl <sub>3</sub> .....   | S68 |
| 100 MHz <sup>13</sup> C-NMR of compound 30 in CDCl <sub>3</sub> .....  | S69 |
| 400 MHz <sup>1</sup> H-NMR of compound 31 in CDCl <sub>3</sub> .....   | S70 |
| 100 MHz <sup>13</sup> C-NMR of compound 31 in CDCl <sub>3</sub> .....  | S71 |
| 100 MHz <sup>13</sup> C-NMR of compound 32 in CDCl <sub>3</sub> .....  | S73 |
| 400 MHz <sup>1</sup> H-NMR of compound 34 in CDCl <sub>3</sub> .....   | S74 |
| 100 MHz <sup>13</sup> C-NMR of compound 34 in CDCl <sub>3</sub> .....  | S75 |
| 400 MHz <sup>1</sup> H-NMR of compound 36a in CDCl <sub>3</sub> .....  | S76 |
| 100 MHz <sup>13</sup> C-NMR of compound 36a in CDCl <sub>3</sub> ..... | S77 |
| 400 MHz <sup>1</sup> H-NMR of compound 36b in CDCl <sub>3</sub> .....  | S78 |
| 100 MHz <sup>13</sup> C-NMR of compound 36b in CDCl <sub>3</sub> ..... | S79 |
| 400 MHz <sup>1</sup> H-NMR of compound 37a in CDCl <sub>3</sub> .....  | S80 |
| 100 MHz <sup>13</sup> C-NMR of compound 37a in CDCl <sub>3</sub> ..... | S81 |
| 400 MHz <sup>1</sup> H-NMR of compound 37b in CDCl <sub>3</sub> .....  | S82 |
| 100 MHz <sup>13</sup> C-NMR of compound 37b in CDCl <sub>3</sub> ..... | S83 |
| 400 MHz <sup>1</sup> H-NMR of compound 38a in CDCl <sub>3</sub> .....  | S84 |
| 100 MHz <sup>13</sup> C-NMR of compound 38a in CDCl <sub>3</sub> ..... | S85 |
| 400 MHz <sup>1</sup> H-NMR of compound 38b in CDCl <sub>3</sub> .....  | S86 |
| 100 MHz <sup>13</sup> C-NMR of compound 38b in CDCl <sub>3</sub> ..... | S87 |
| 400 MHz <sup>1</sup> H-NMR of compound 39a in CDCl <sub>3</sub> .....  | S88 |
| 100 MHz <sup>13</sup> C-NMR of compound 39a in CDCl <sub>3</sub> ..... | S89 |
| 400 MHz <sup>1</sup> H-NMR of compound 39b in CDCl <sub>3</sub> .....  | S90 |
| 100 MHz <sup>13</sup> C-NMR of compound 39b in CDCl <sub>3</sub> ..... | S91 |
| LC/MS analyses .....                                                   | S92 |

# 500 MHz <sup>1</sup>H-NMR of compound 4 in CDCl<sub>3</sub>

PHD-001-44  
STANDARD PROTON PARAMETERS

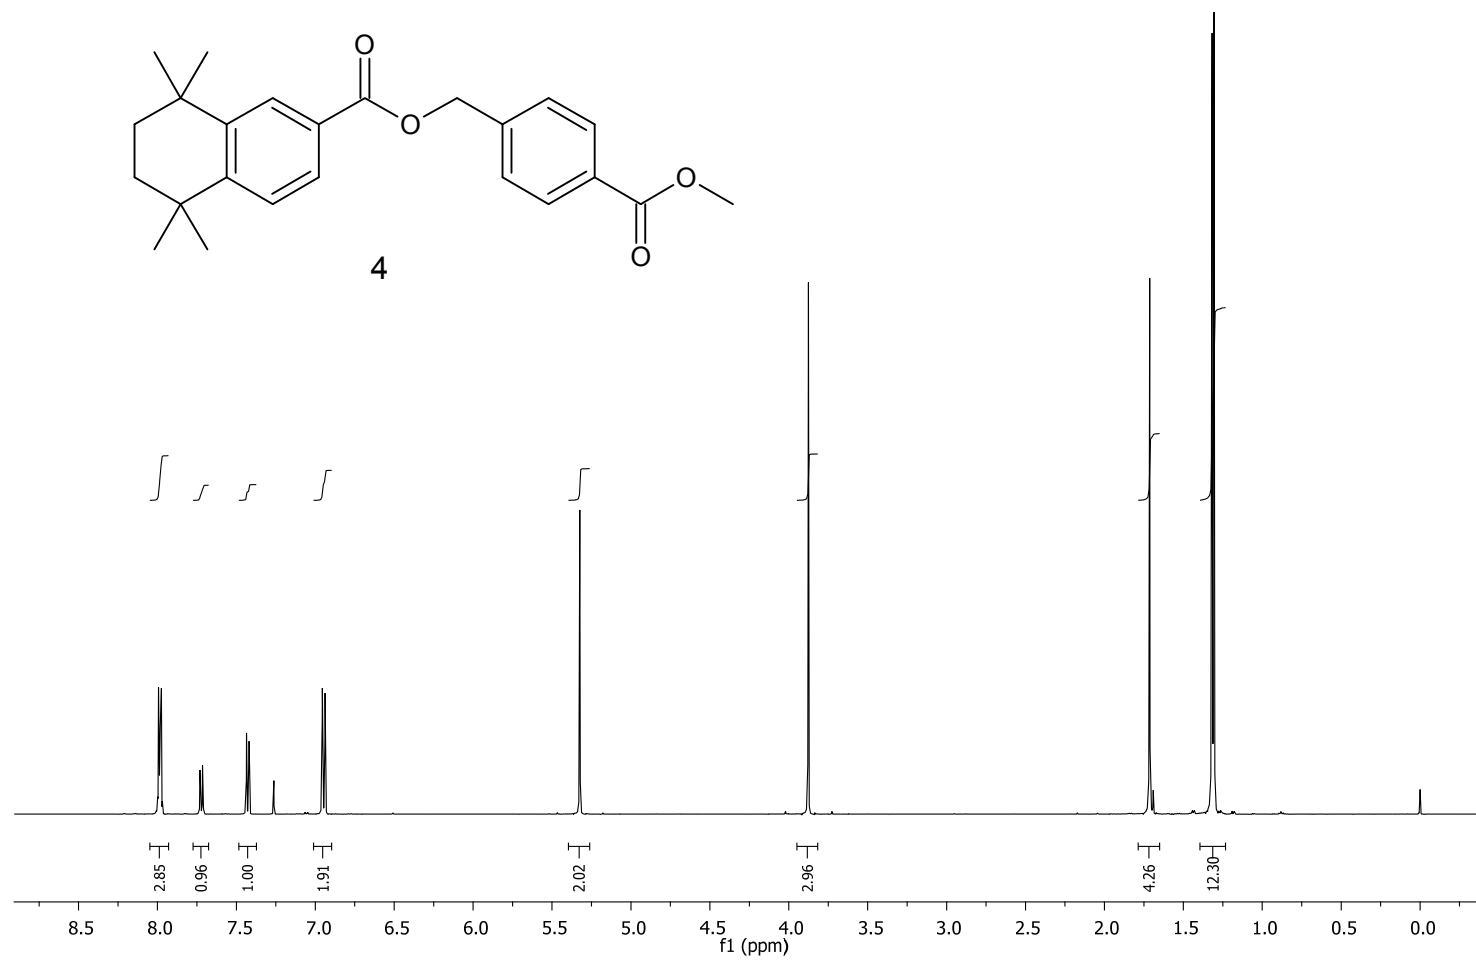

# 125 MHz <sup>13</sup>C-NMR of compound 4 in CDCl<sub>3</sub>

PHD-001-44-C13  
STANDARD CARBON PARAMETERS

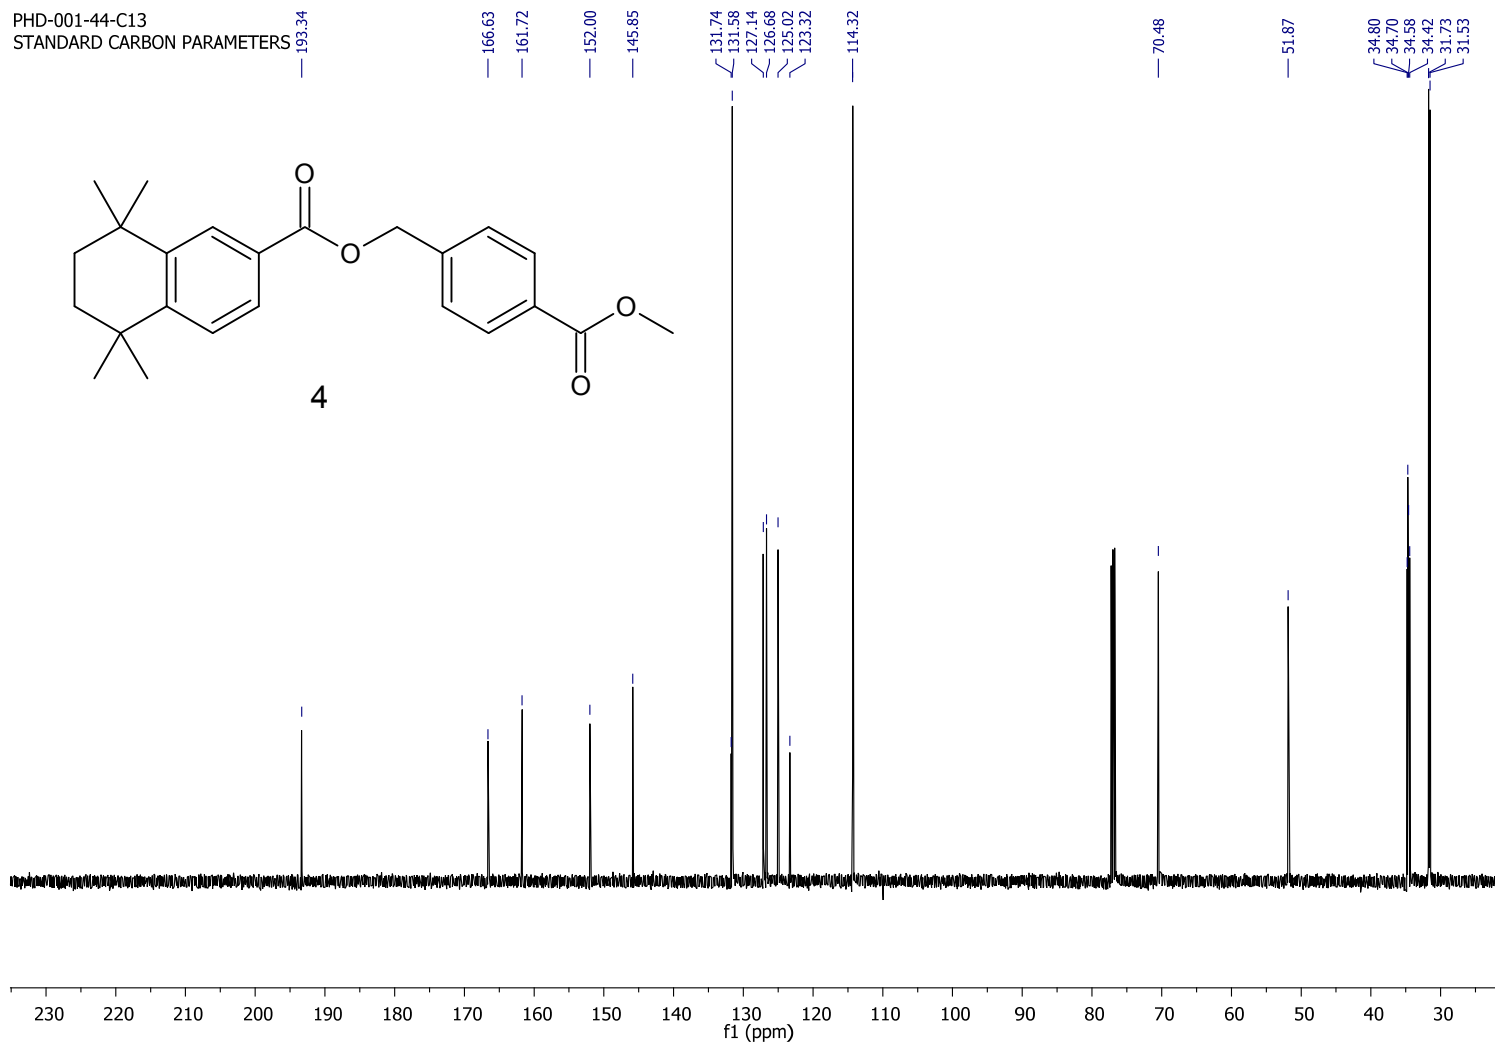

# 400 MHz $^1\text{H-NMR}$ of compound 5 in $\text{CDCl}_3$

PHD-02-43-proton

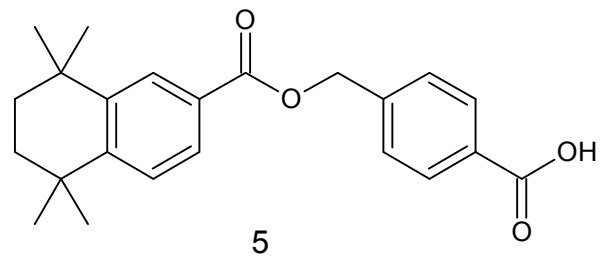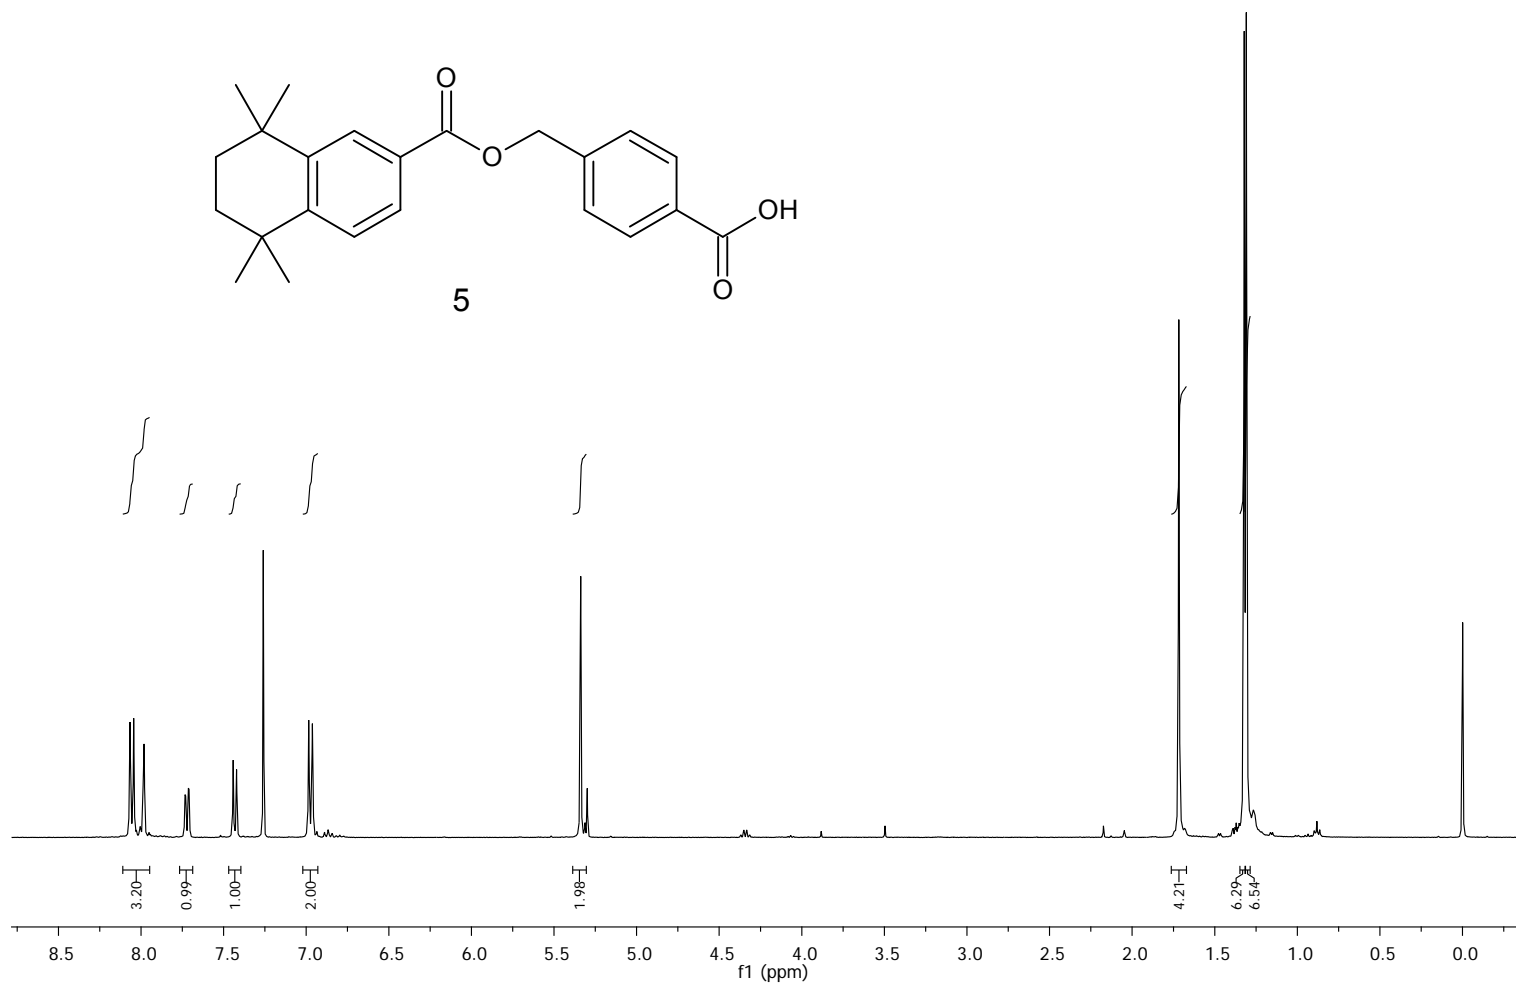

# 100 MHz $^{13}\text{C}$ -NMR of compound 5 in $\text{CDCl}_3$

PHD-02-43-C13

193.30

170.88

162.50

152.11

145.95

132.40

131.80

127.21

126.77

125.07

122.38

114.51

70.56

34.86

34.77

34.66

34.47

31.77

31.57

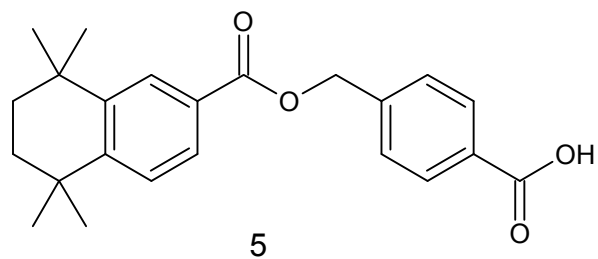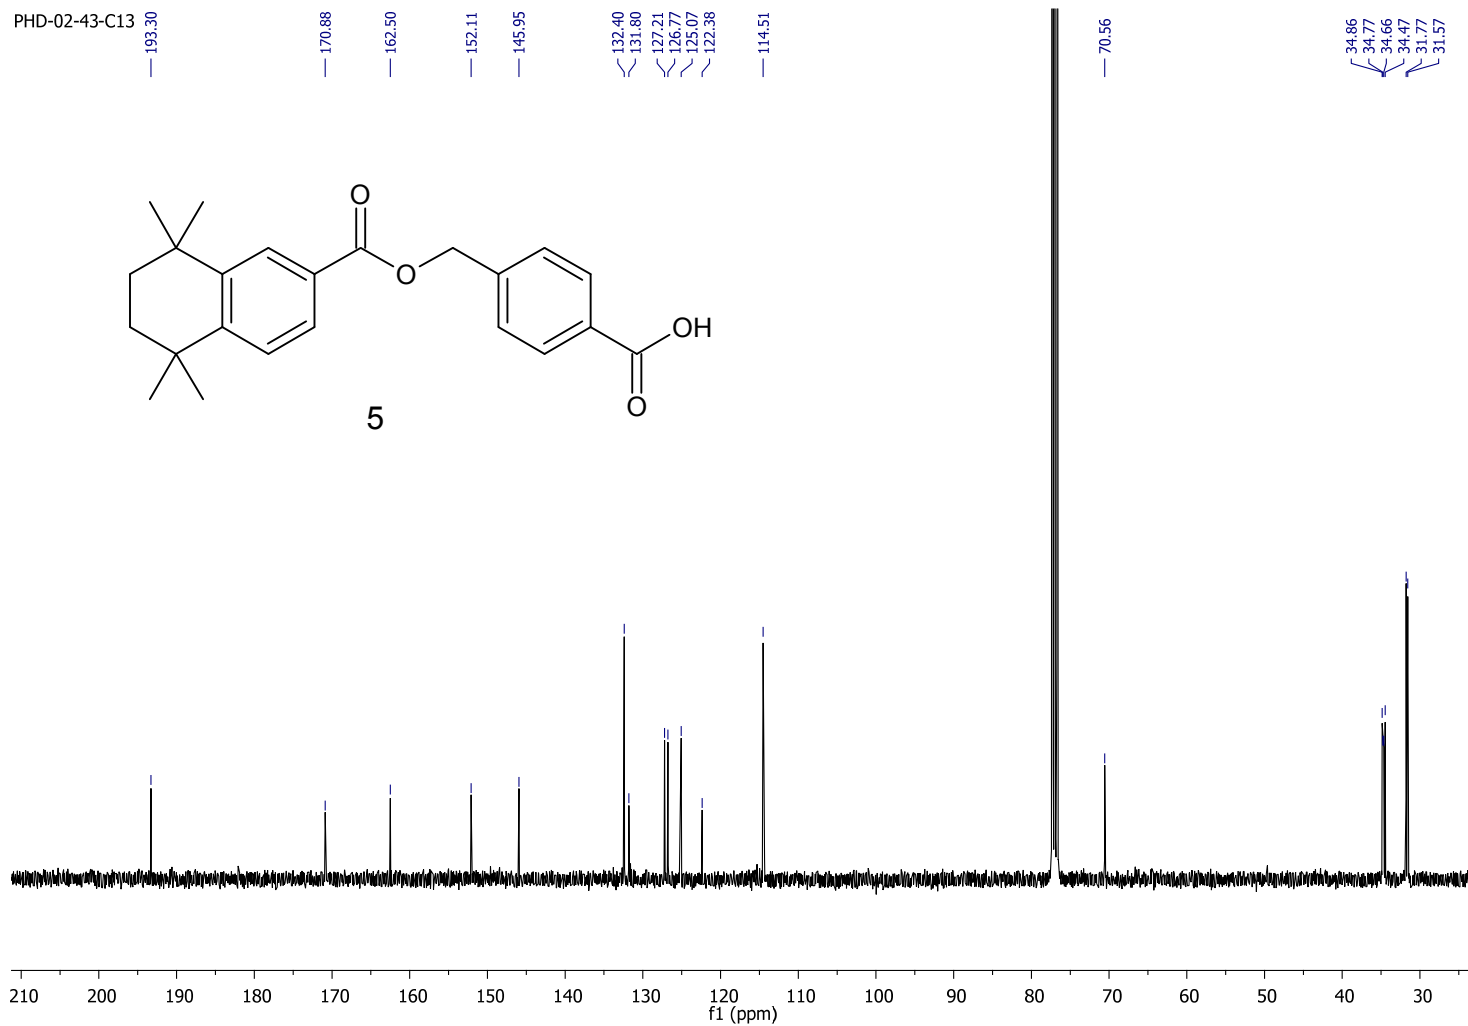

# 400 MHz $^1\text{H}$ -NMR of compound 6 in $\text{CDCl}_3$

PHD-02-50-proton

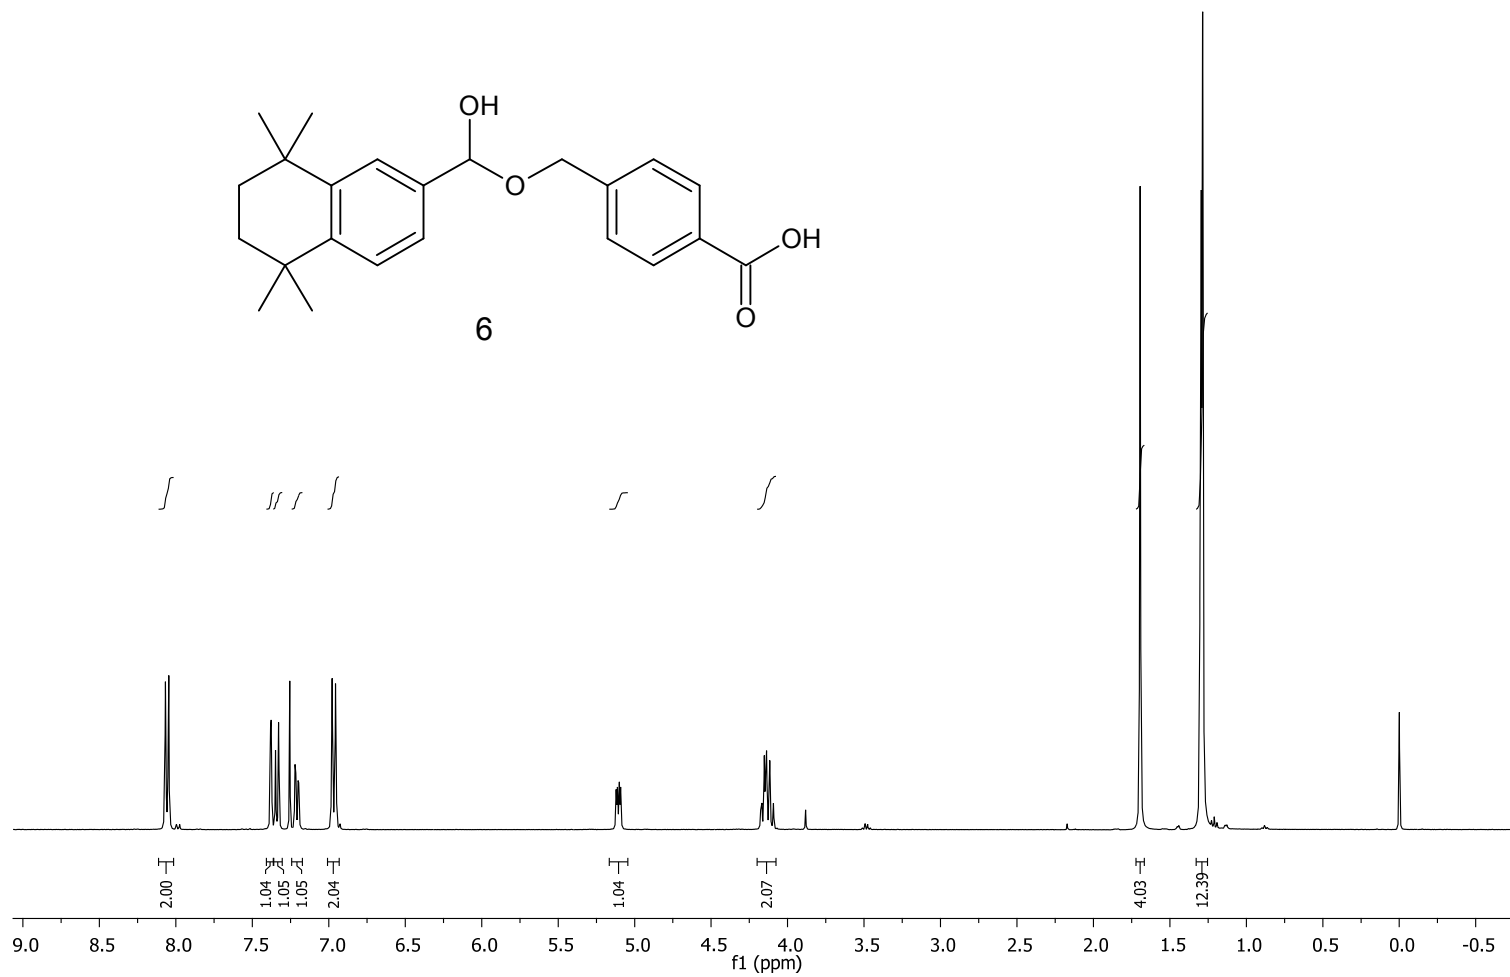



# 100 MHz $^{13}\text{C}$ -NMR of compound 6 in $\text{CDCl}_3$

PHD-02-50-C13

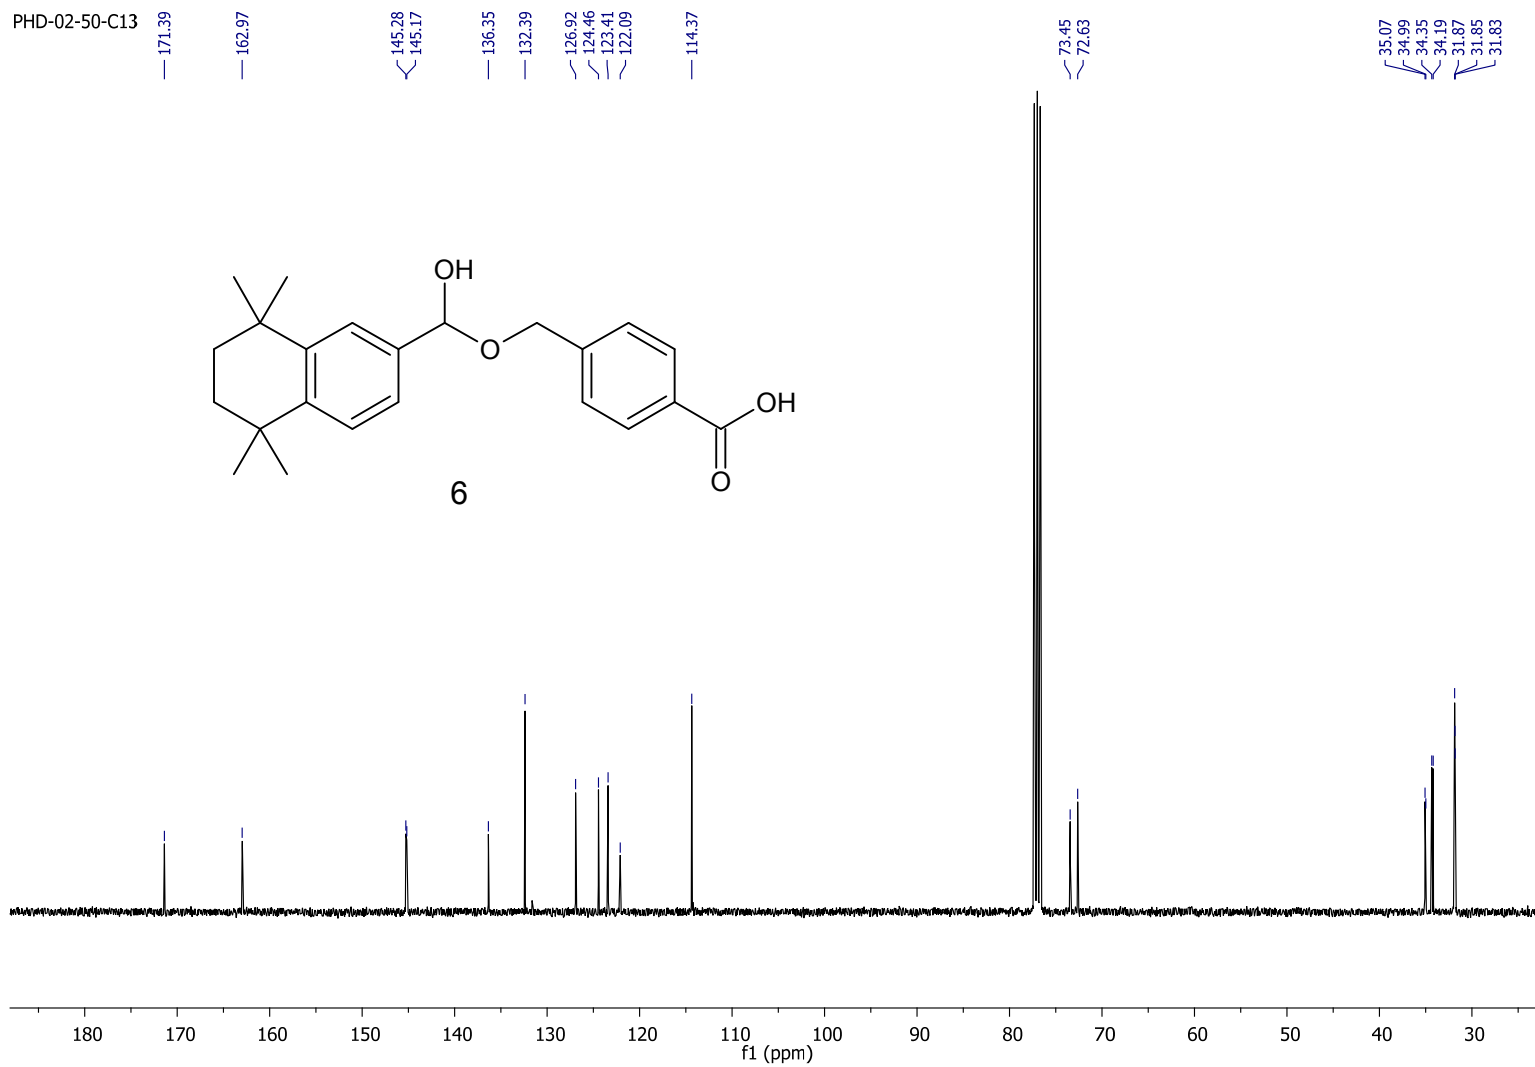

# 500 MHz $^1\text{H-NMR}$ of compound 7 in $\text{CDCl}_3$

CMK-02-3B-proton  
STANDARD PROTON PARAMETERS

8.21  
7.99  
7.97  
7.59  
7.58  
7.39  
7.39  
7.36  
7.34  
6.97

4.95

3.88

1.69

1.28  
1.25

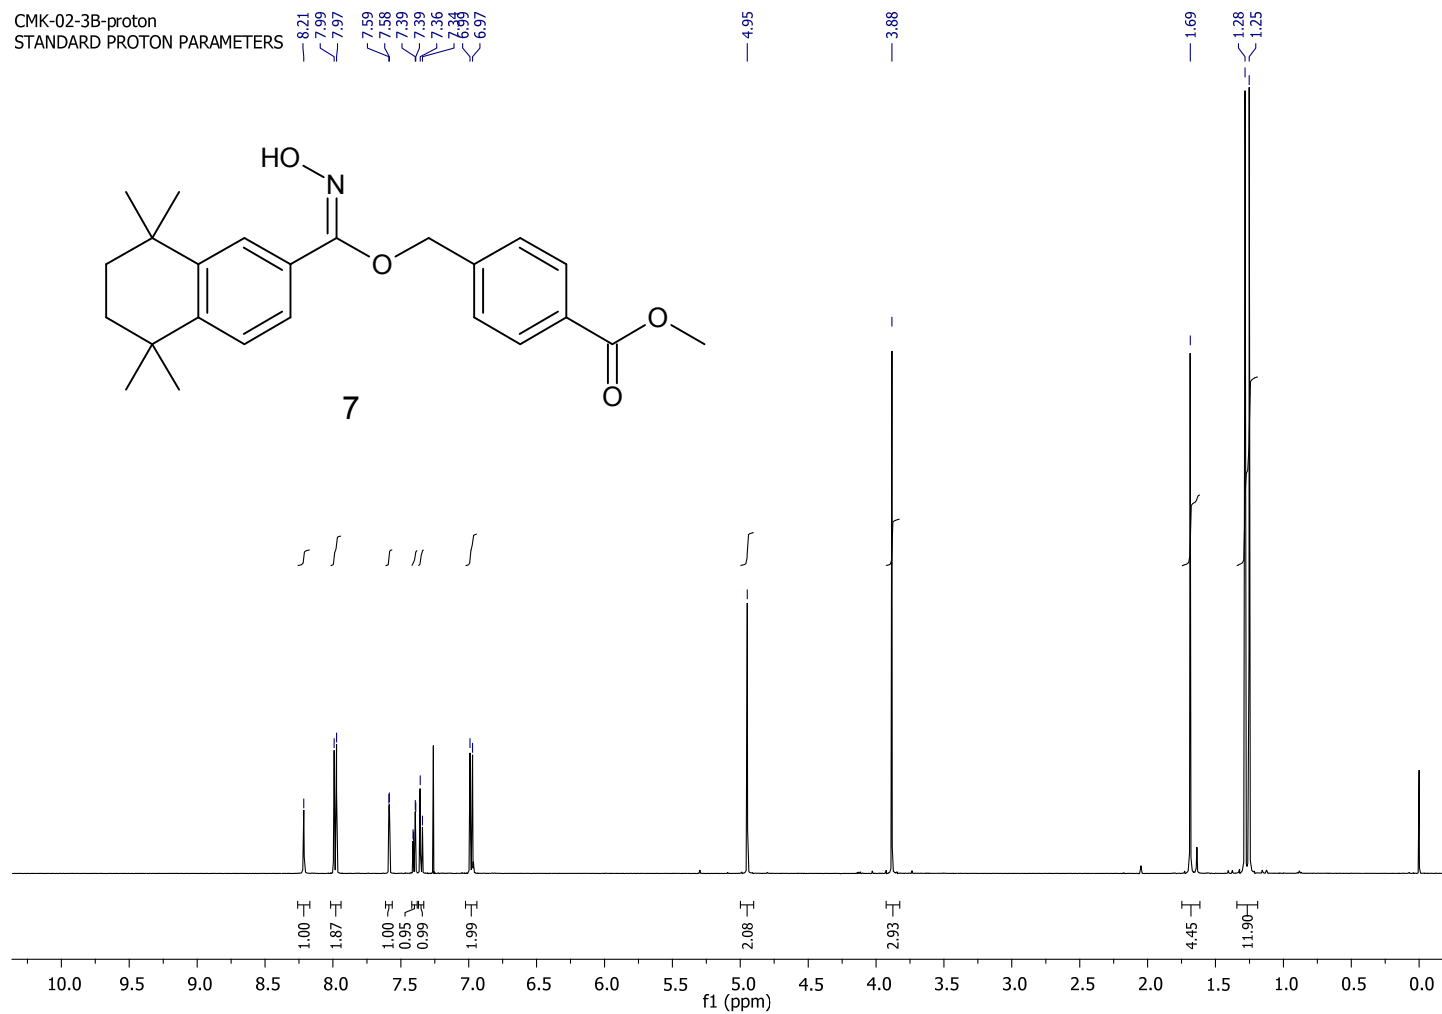

# 100 MHz $^{13}\text{C}$ -NMR of compound 7 in $\text{CDCl}_3$

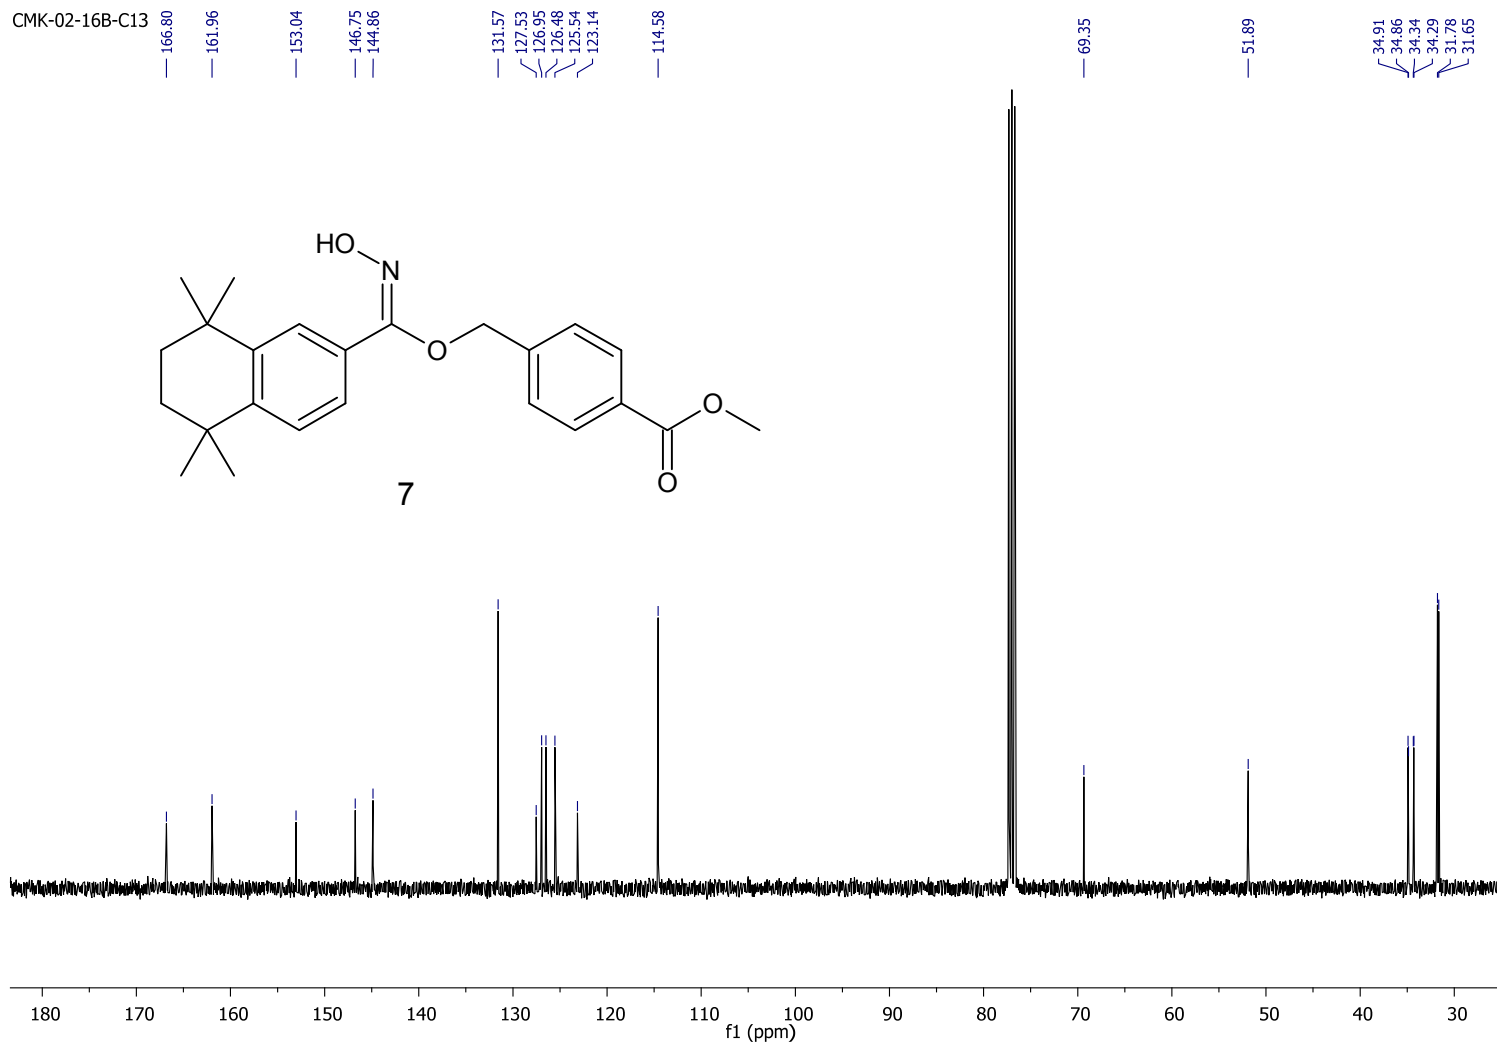

# 500 MHz $^1\text{H-NMR}$ of Compound 8 in $\text{CDCl}_3$

CMK-02-3A-proton  
STANDARD PROTON PARAMETERS

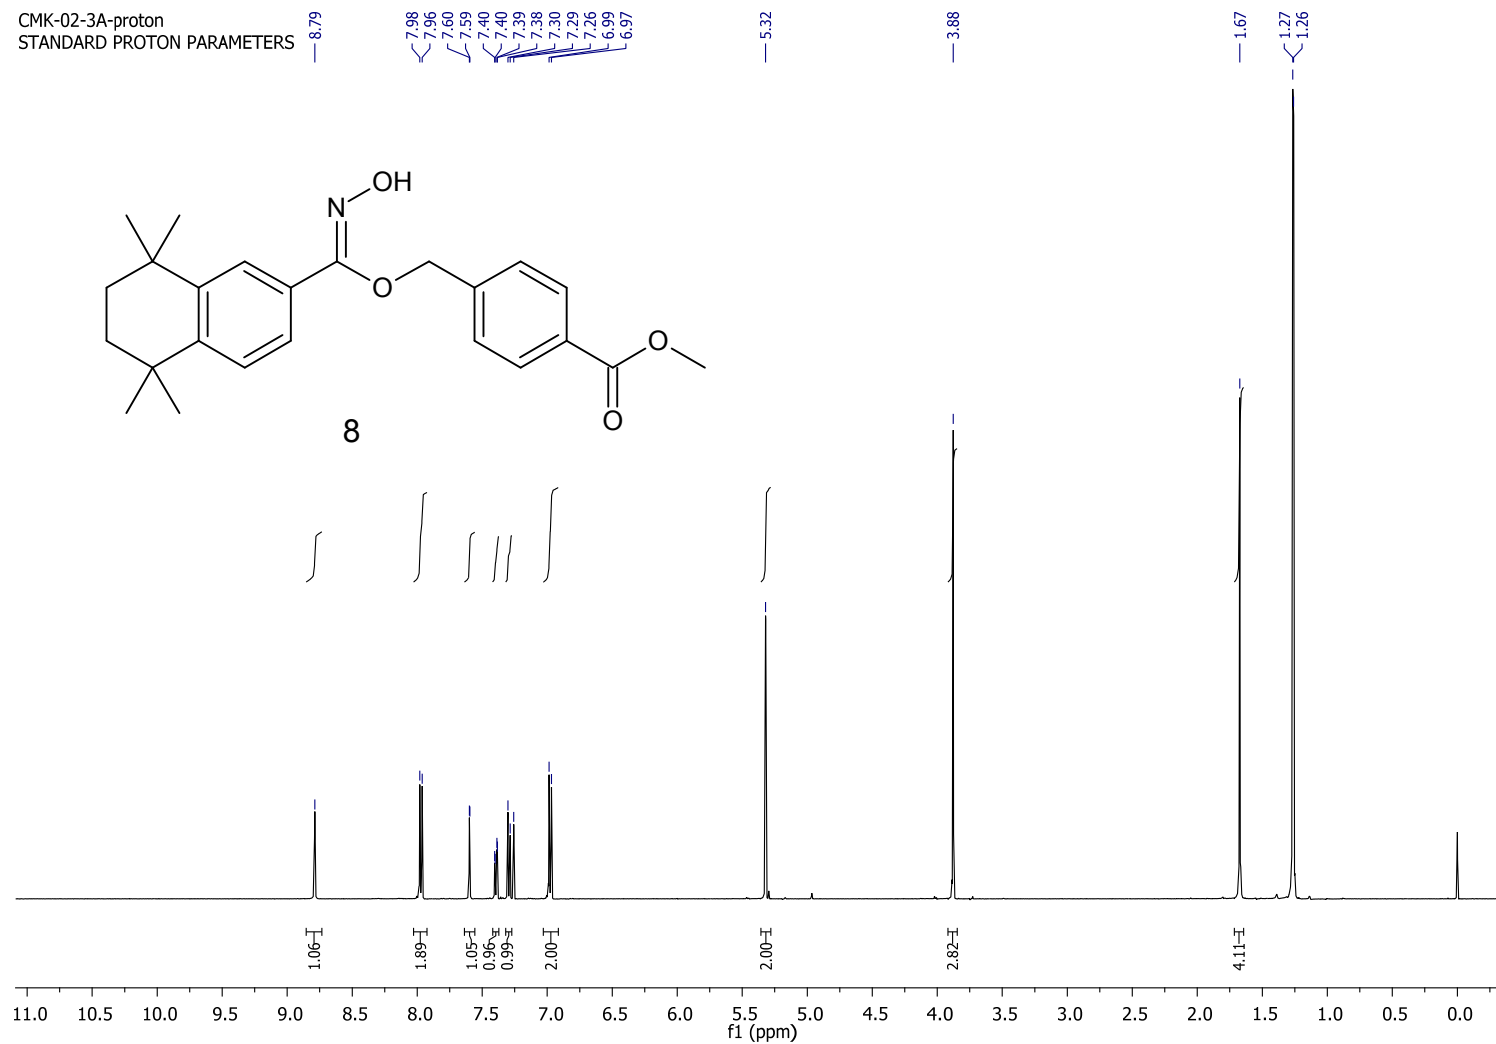

# 125 MHz <sup>13</sup>C-NMR of compound 8 in CDCl<sub>3</sub>

CMK-02-3A-C13  
STANDARD CARBON PARAMETERS

166.81

161.81

155.20

146.73

144.91

131.59

130.12

126.69

125.35

124.01

123.09

114.25

59.86

51.91

34.93

34.85

34.30

34.29

31.78

31.65

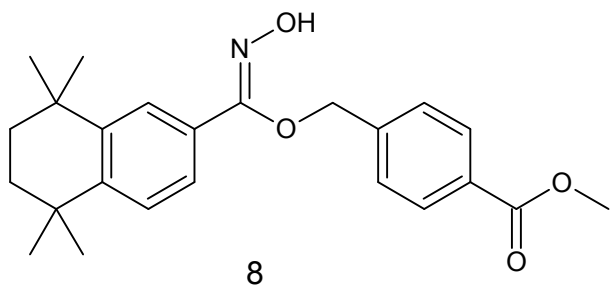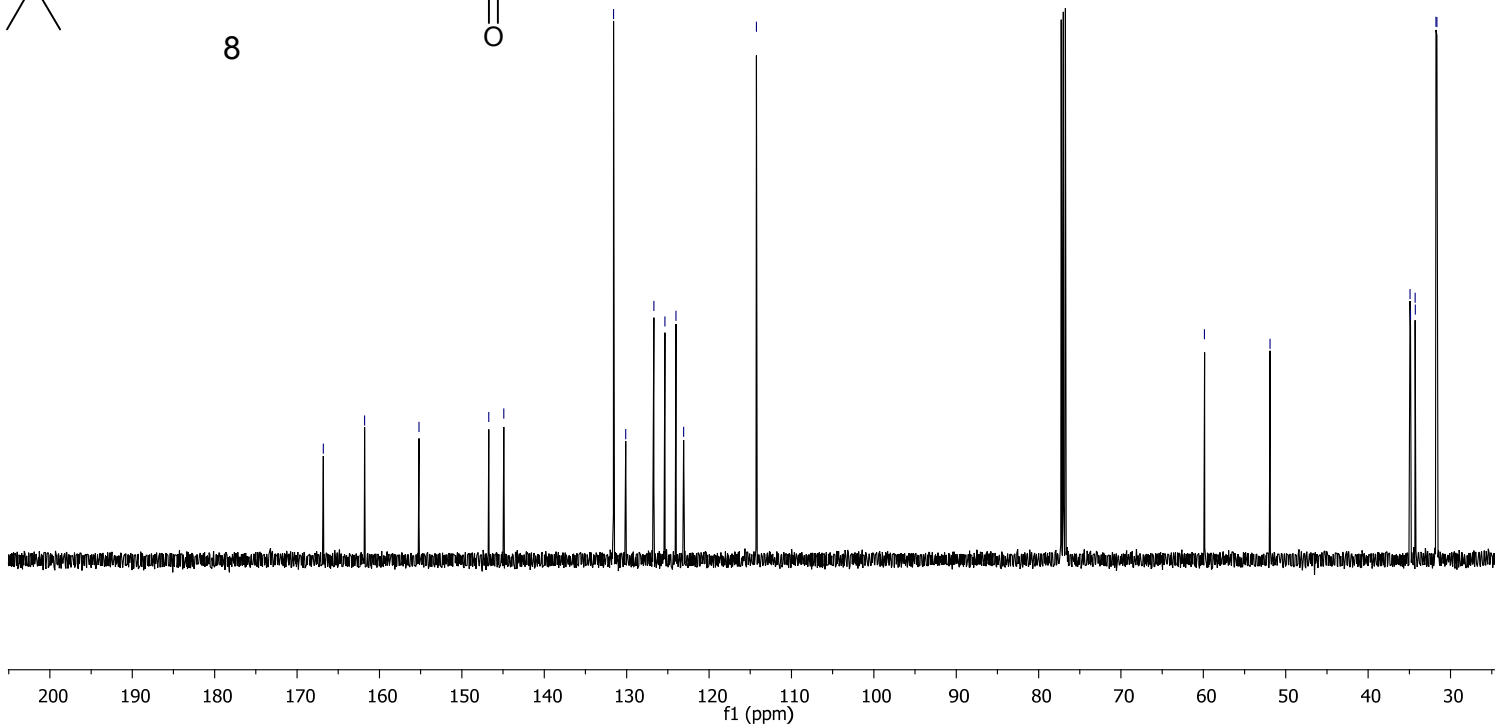

# 500 MHz $^1\text{H-NMR}$ of compound 9 in $\text{CDCl}_3/\text{CD}_3\text{OD}$

CMK-02-2c-proton  
STANDARD PROTON PARAMETERS

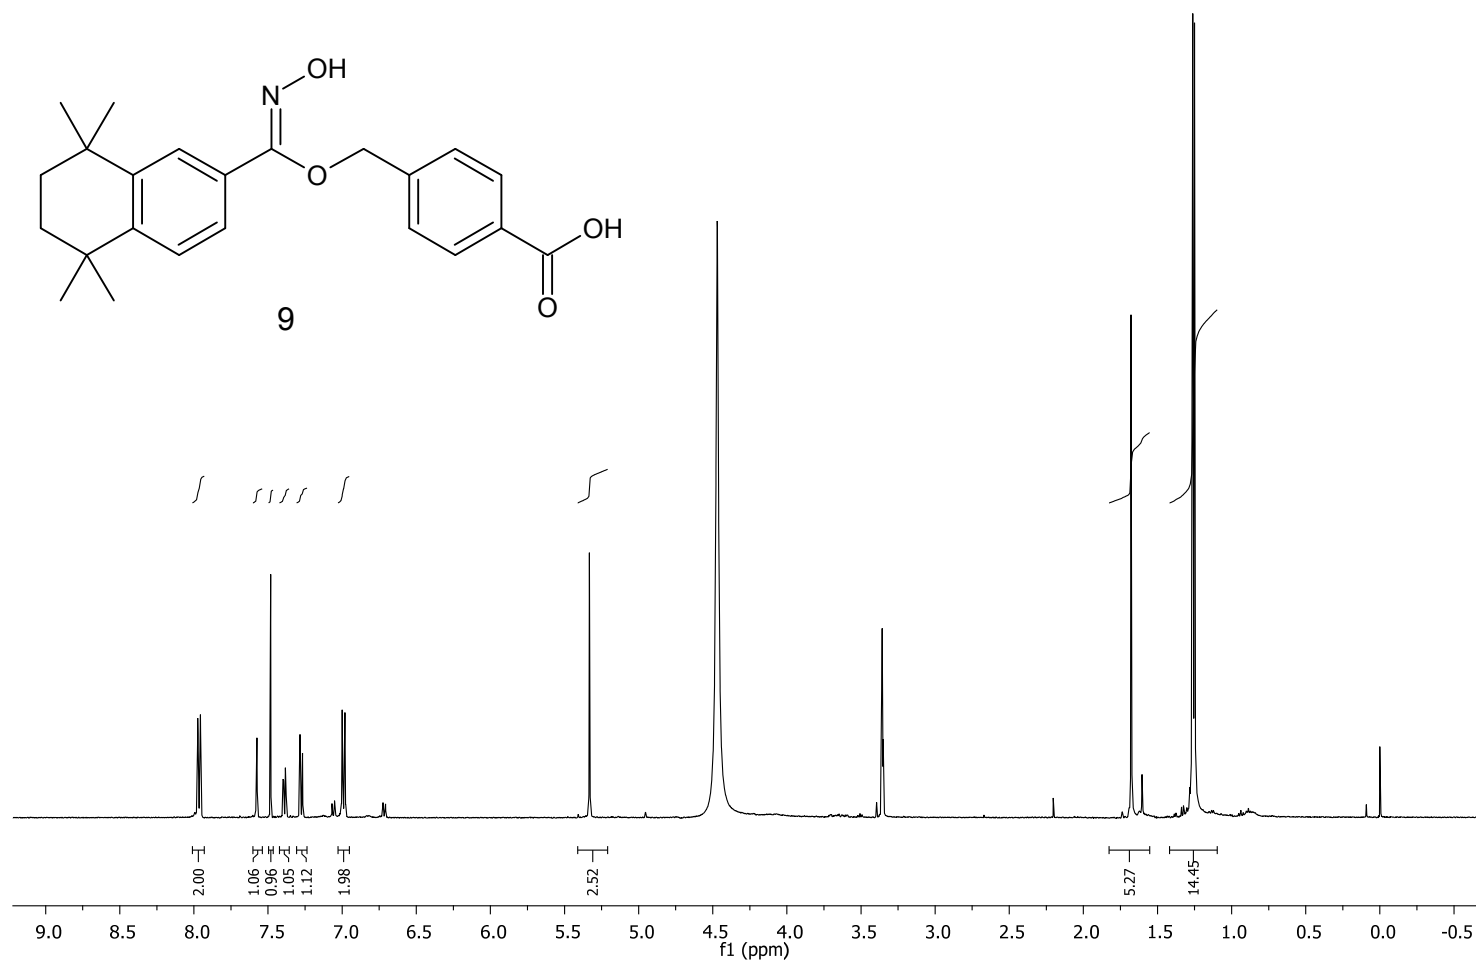

# 125 MHz <sup>13</sup>C-NMR of compound 9 in CDCl<sub>3</sub>/CD<sub>3</sub>OD

CMK-02-2c-C13  
STANDARD CARBON PARAMETERS

— 161.67 — 153.98 — 145.73 — 144.26 — 131.40 — 130.45 — 127.32 — 126.06 — 124.92 — 123.60 — 113.83

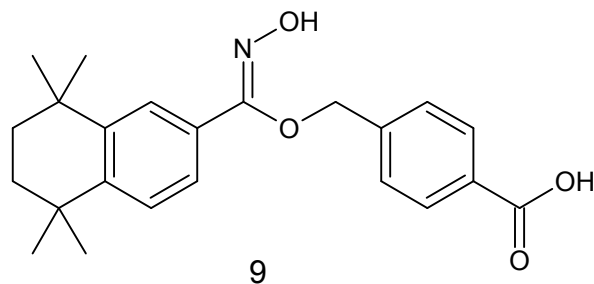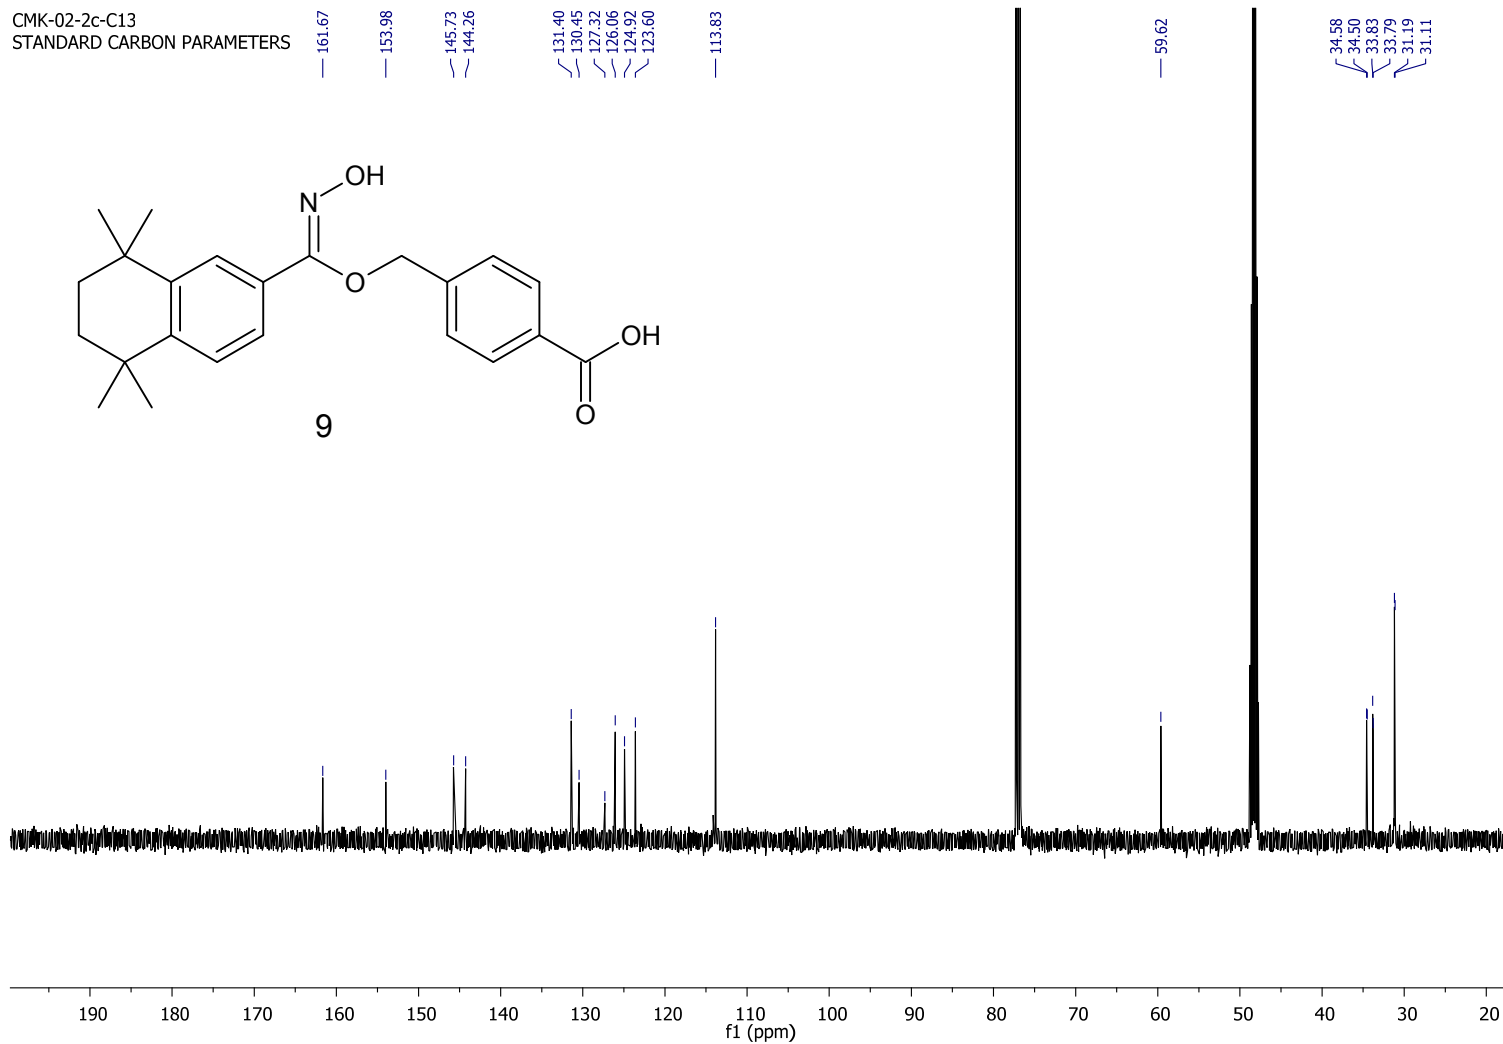

# 400 MHz <sup>1</sup>H-NMR of compound 10a in CDCl<sub>3</sub>

CMK-02-247-proton

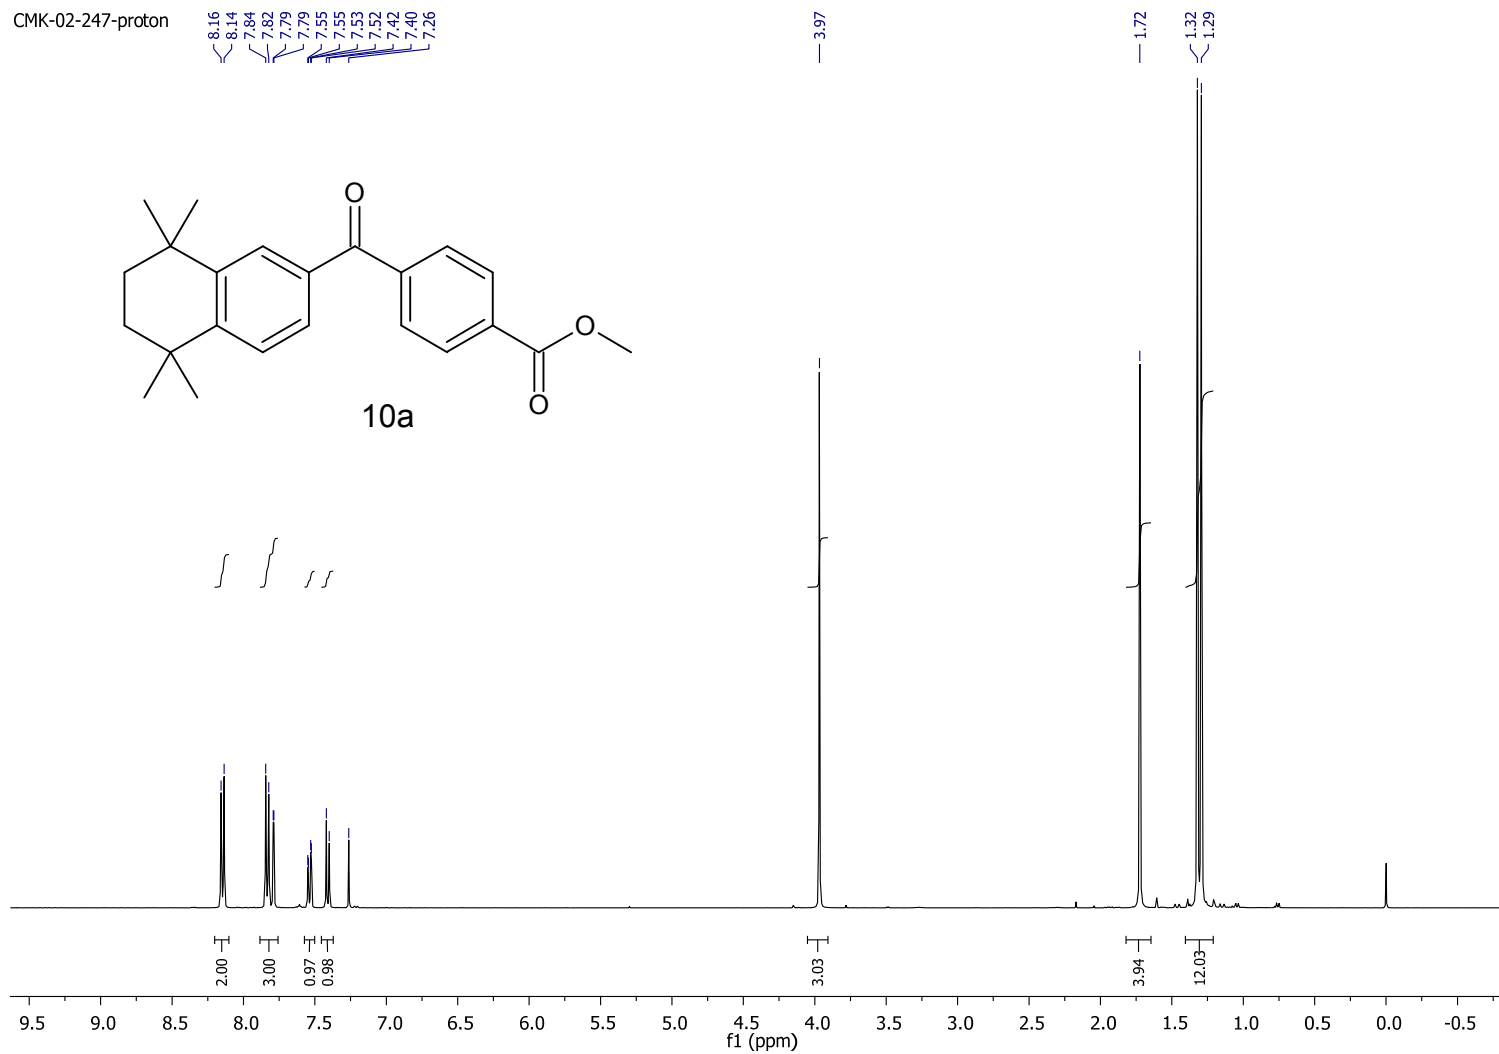



# 100 MHz <sup>13</sup>C-NMR of compound 10a in CDCl<sub>3</sub>

CMK-02-247C13

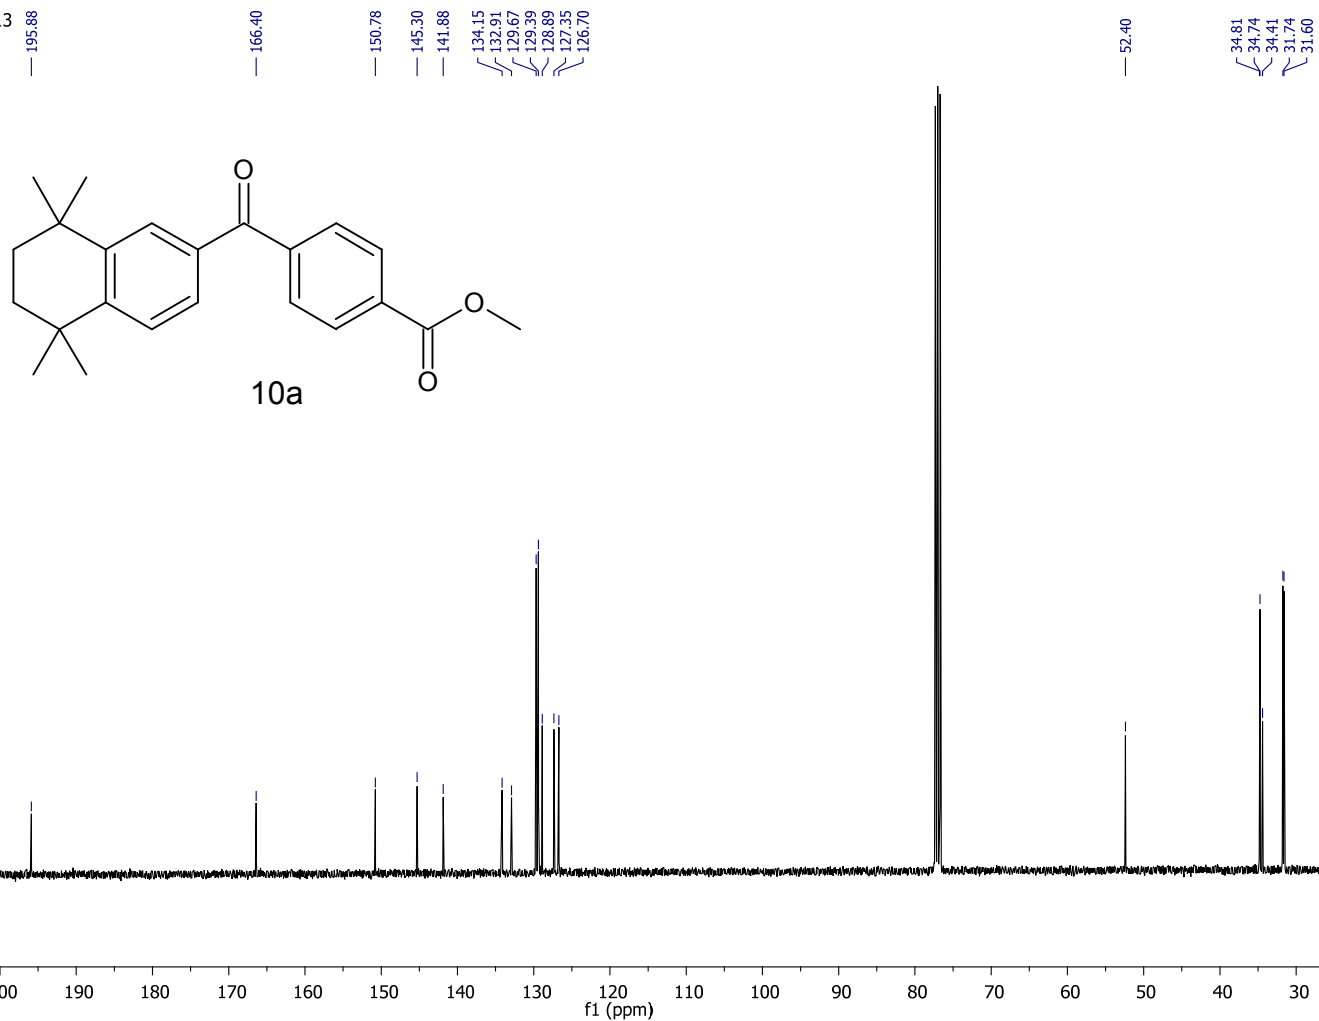

# 400 MHz $^1\text{H-NMR}$ of compound 11a in $\text{CDCl}_3$

CMK-02-50-proton

8.25  
8.23  
7.89  
7.86  
7.81  
7.56  
7.54  
7.54  
7.43  
7.41

1.73  
1.43  
1.33  
1.30

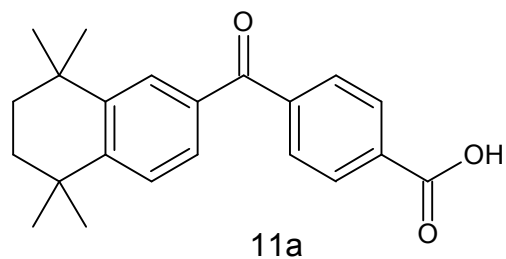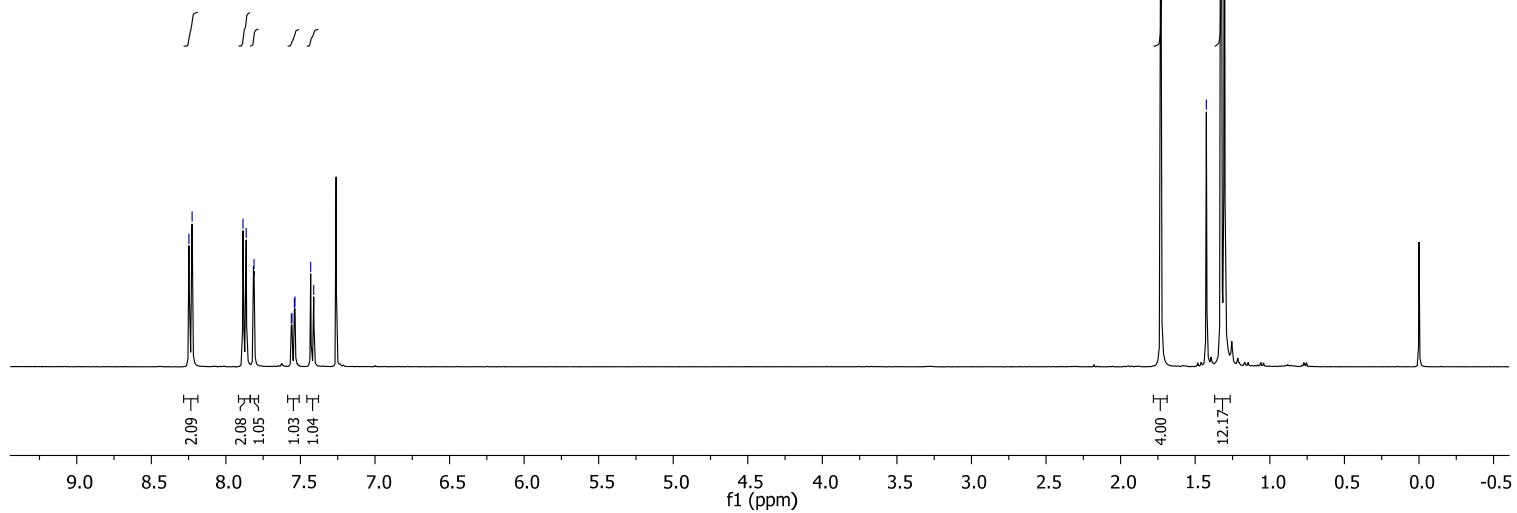

# 100 MHz $^{13}\text{C}$ -NMR of compound 11a in $\text{CDCl}_3$

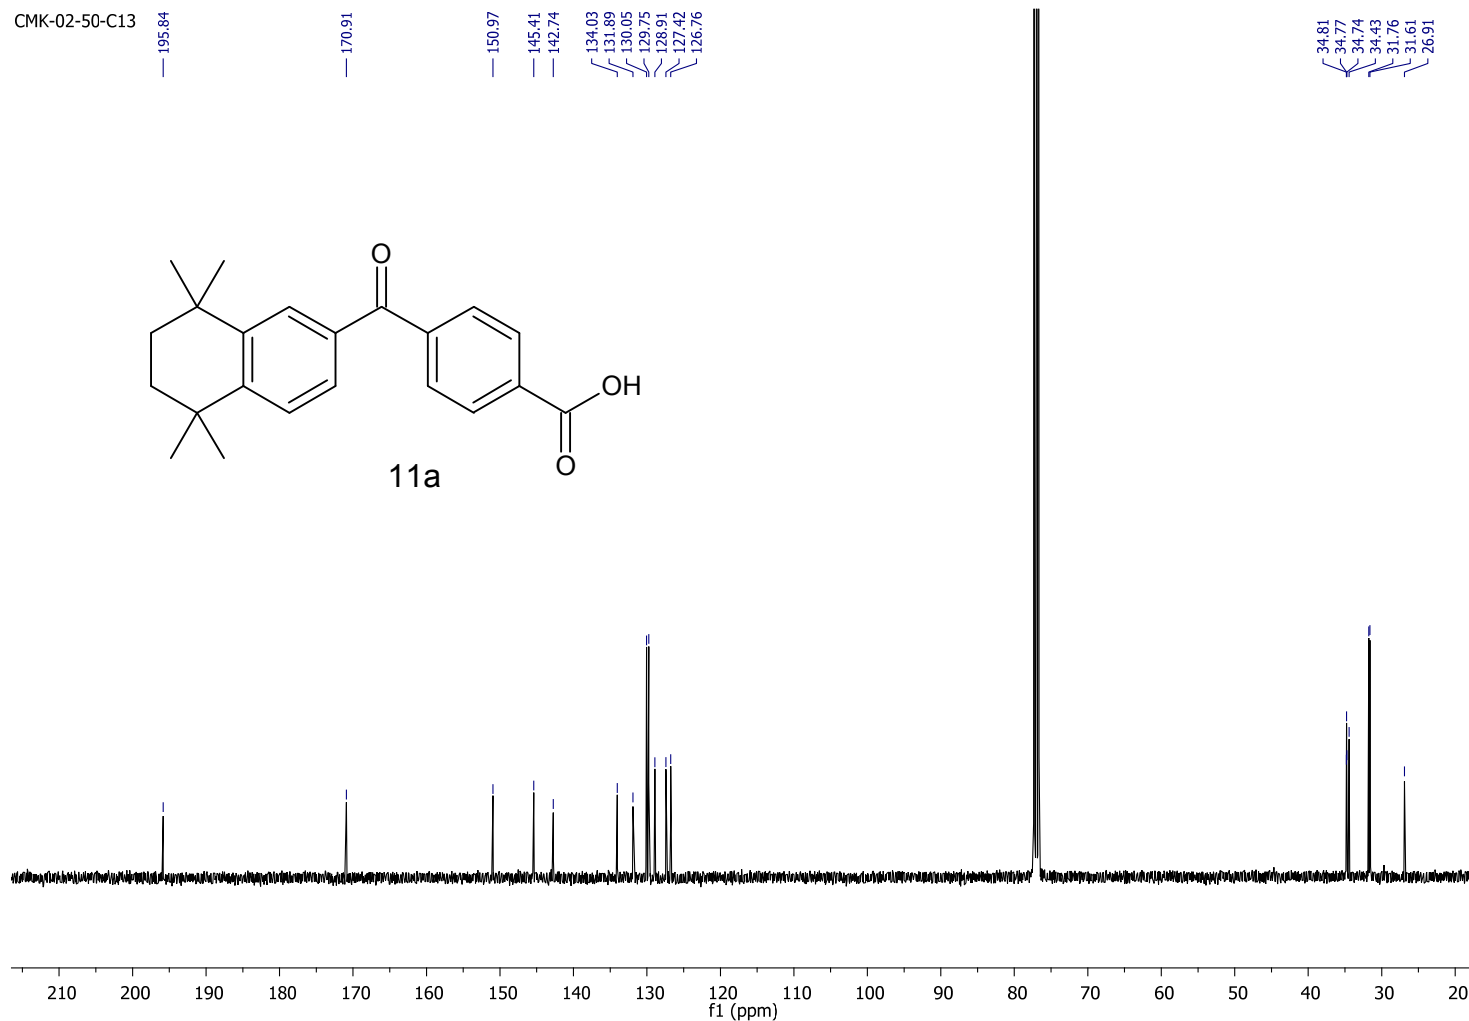

# 400 MHz $^1\text{H-NMR}$ of compound 12a in $\text{CDCl}_3$

CMK-02-51-2-proton

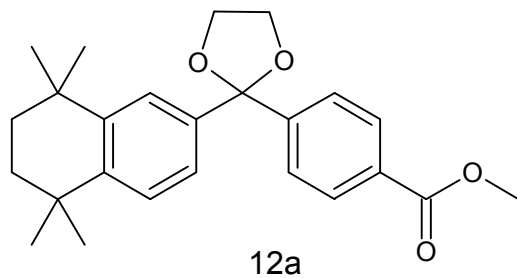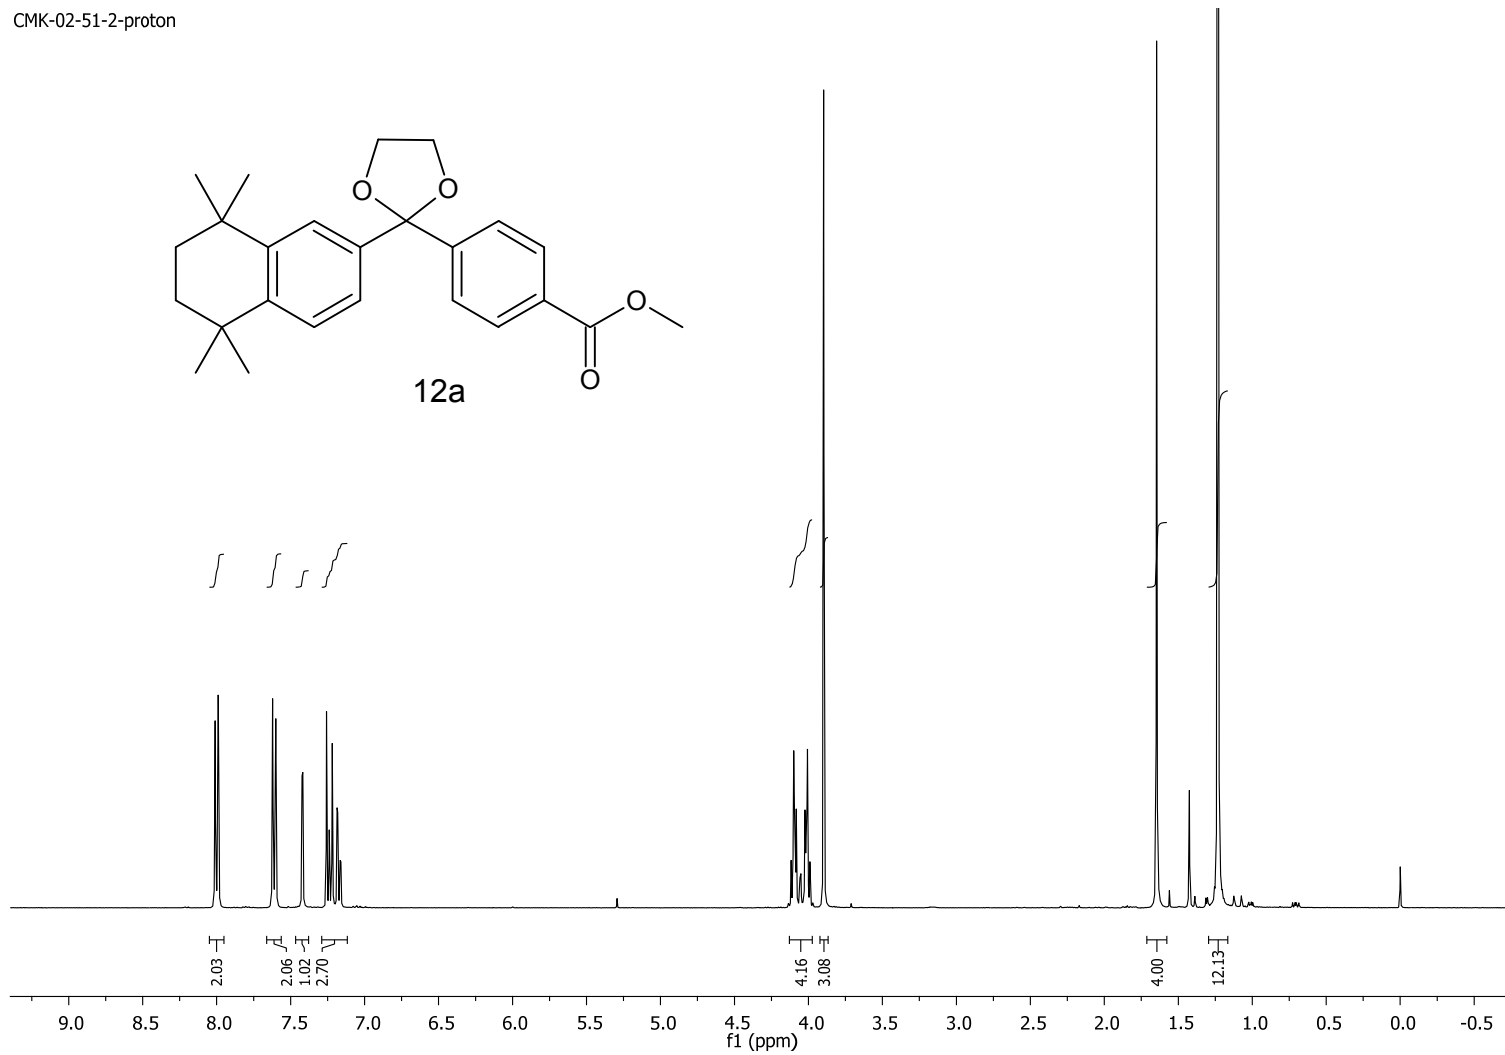

# 100 MHz $^{13}\text{C}$ -NMR of compound 12a in $\text{CDCl}_3$

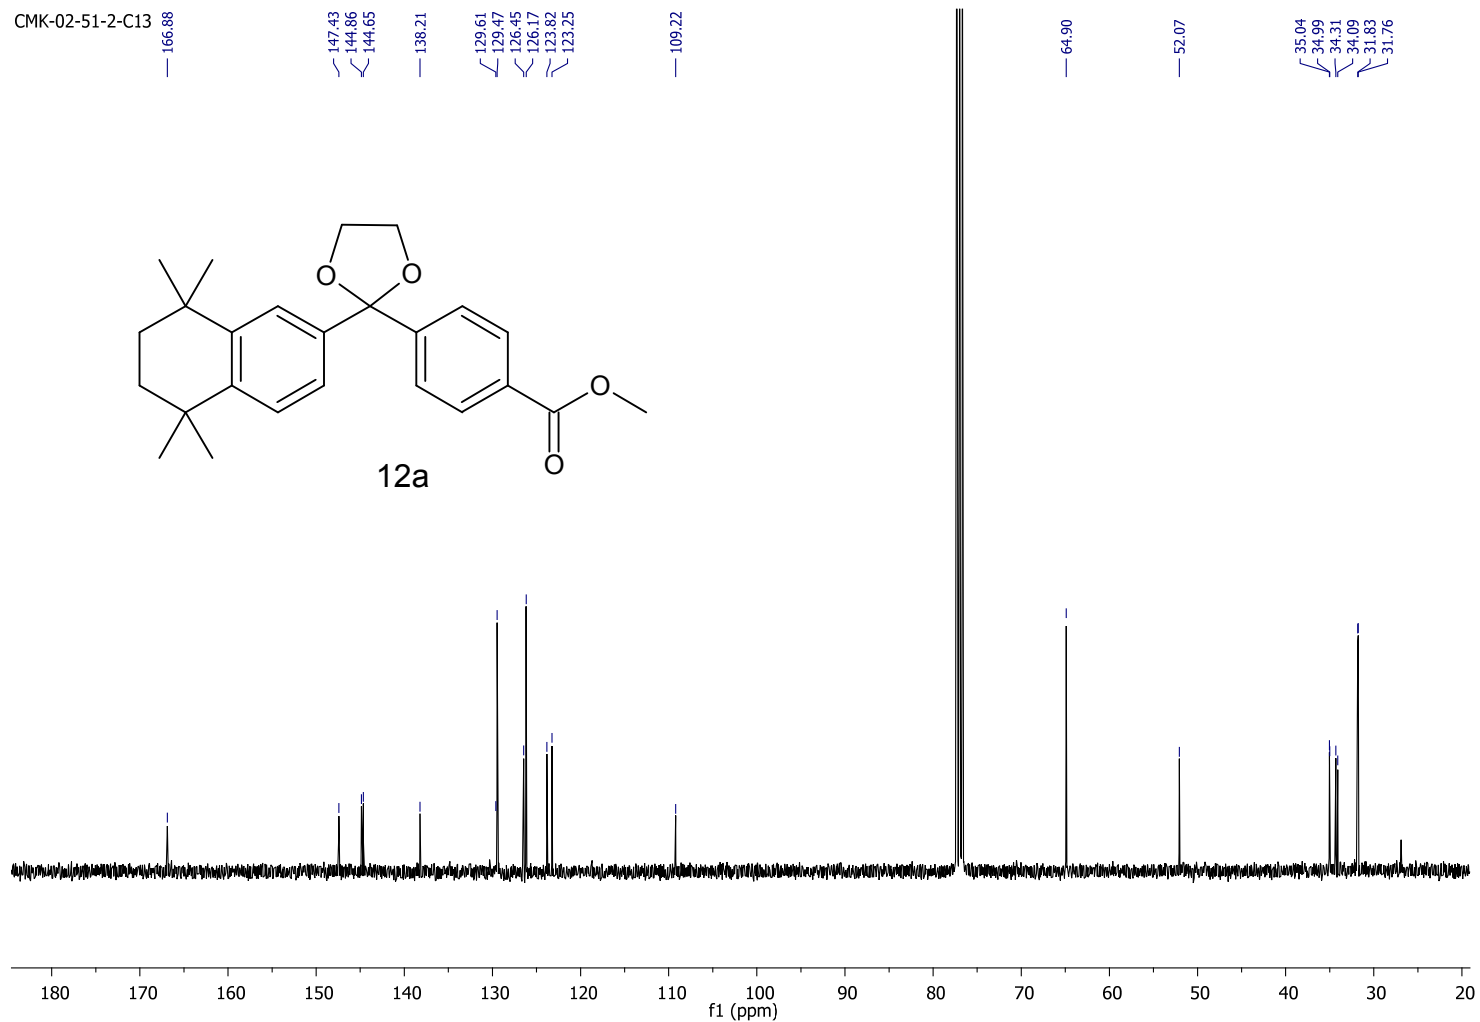

# 400 MHz $^1\text{H}$ -NMR of compound 13a in $\text{CDCl}_3$

CMK-02-55-proton

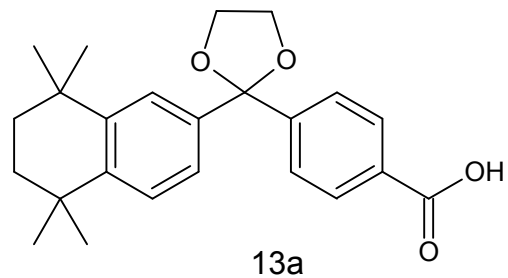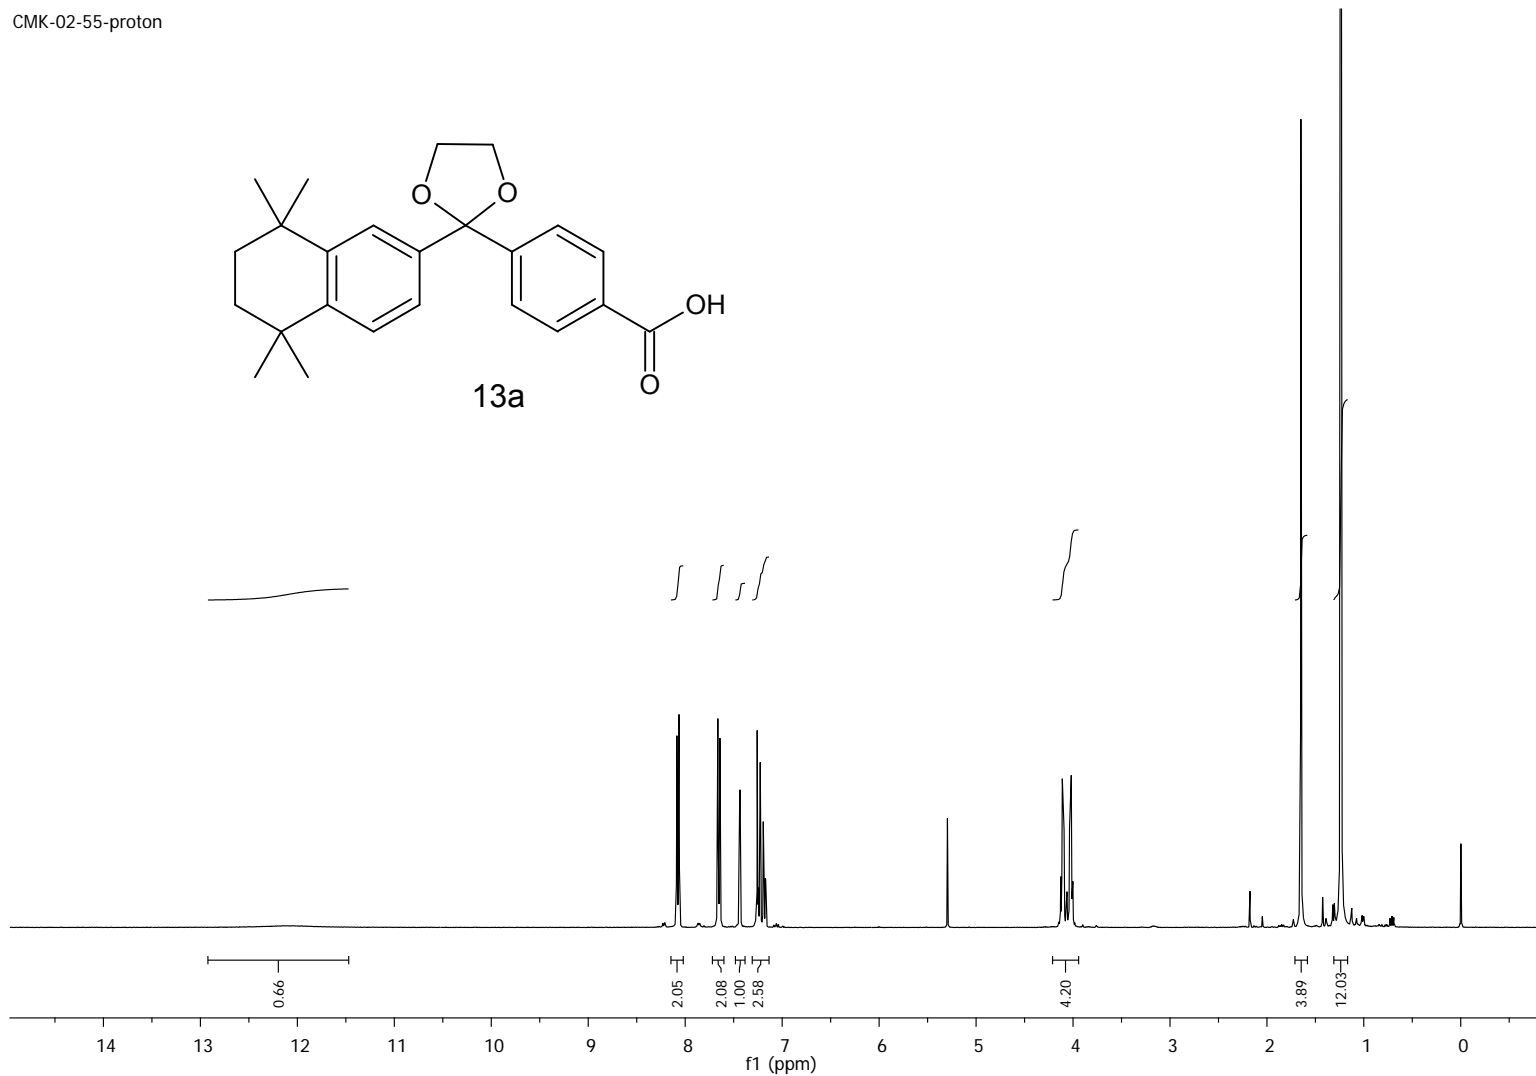

# 100 MHz $^{13}\text{C}$ -NMR of compound 13a in $\text{CDCl}_3$

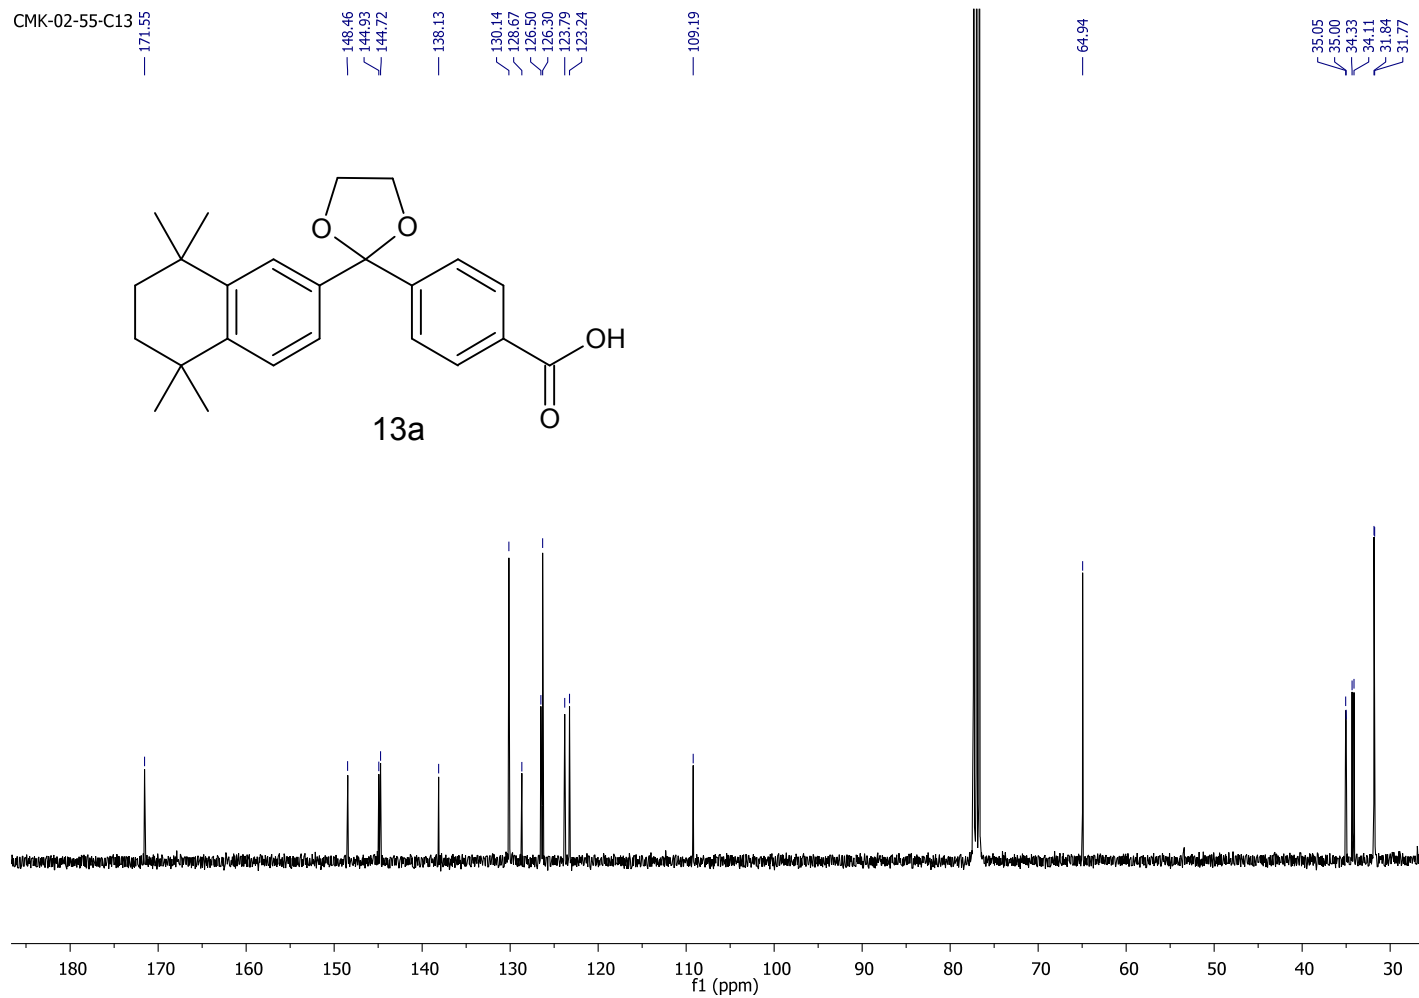

# 400 MHz $^1\text{H}$ -NMR of compound 14a in $\text{CDCl}_3$

CMK-02-53-proton

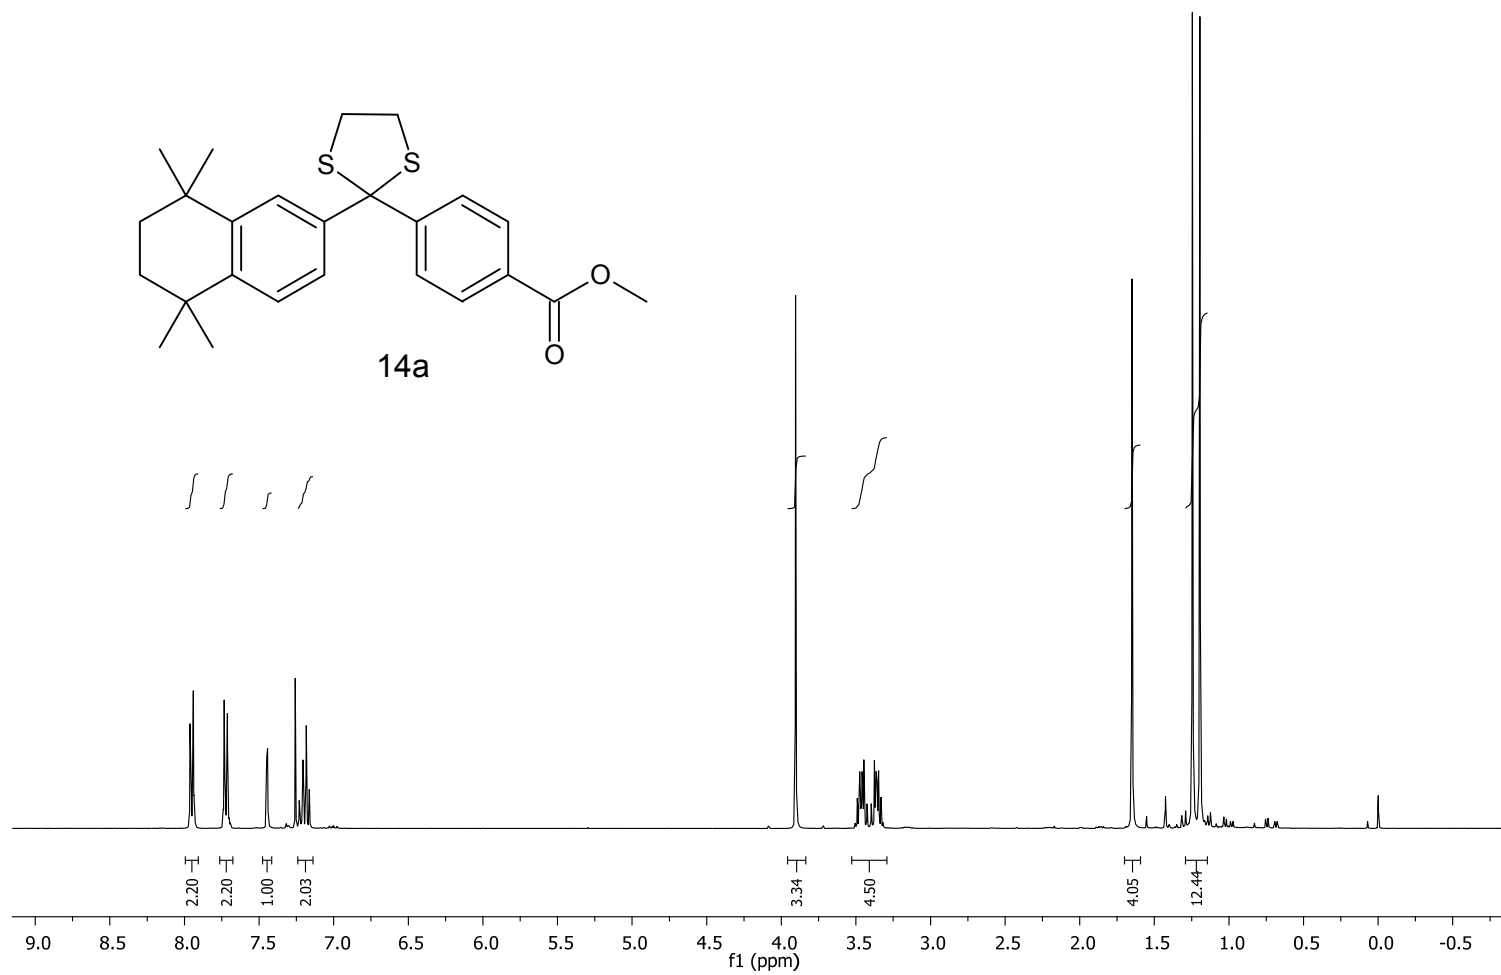



# 100 MHz $^{13}\text{C}$ -NMR of compound 14a in $\text{CDCl}_3$

CMK-02-53-C13

166.79

150.39

144.37

144.03

140.08

129.12

128.77

128.37

126.24

125.34

52.07

40.23

35.02

34.98

34.33

34.02

31.77

31.71

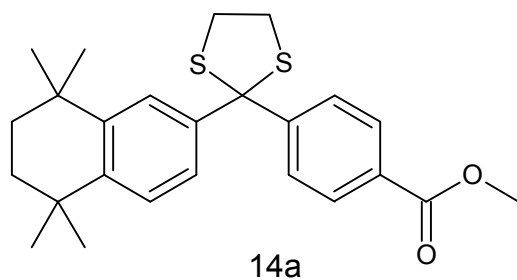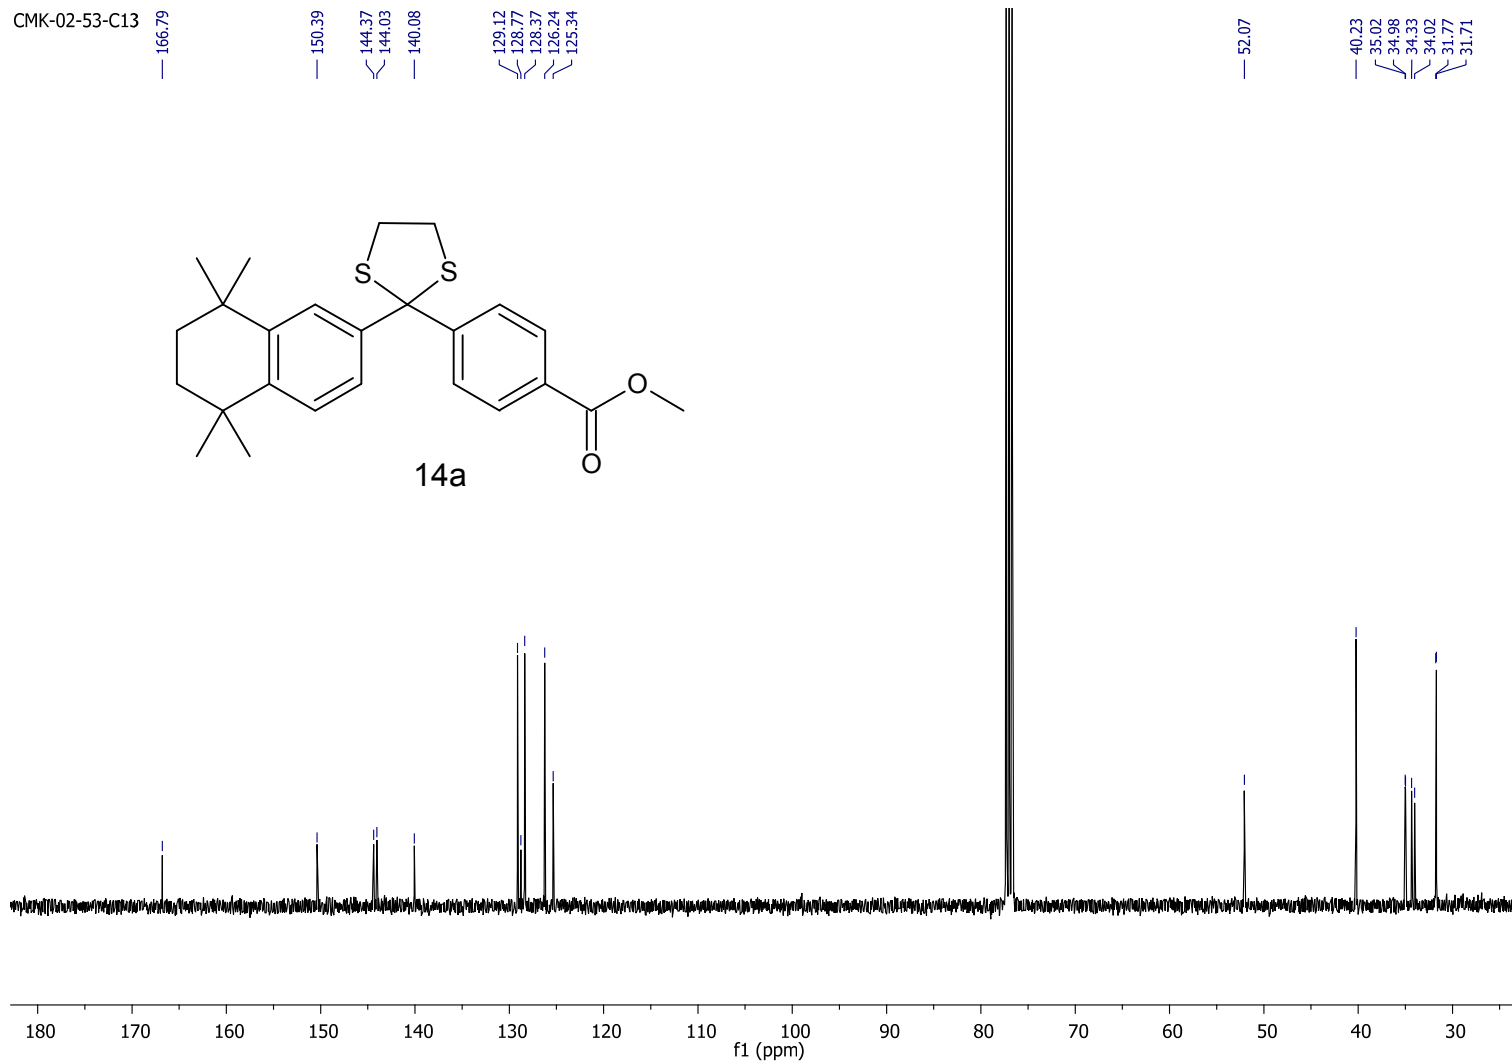

# 400 MHz $^1\text{H-NMR}$ of compound 15a in $\text{CDCl}_3$

CMK-02-54-proton

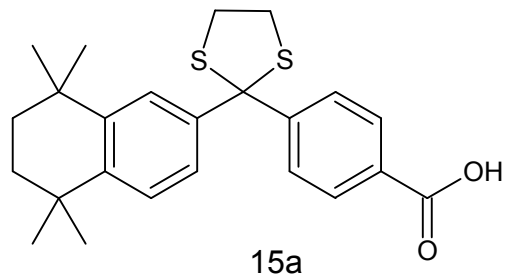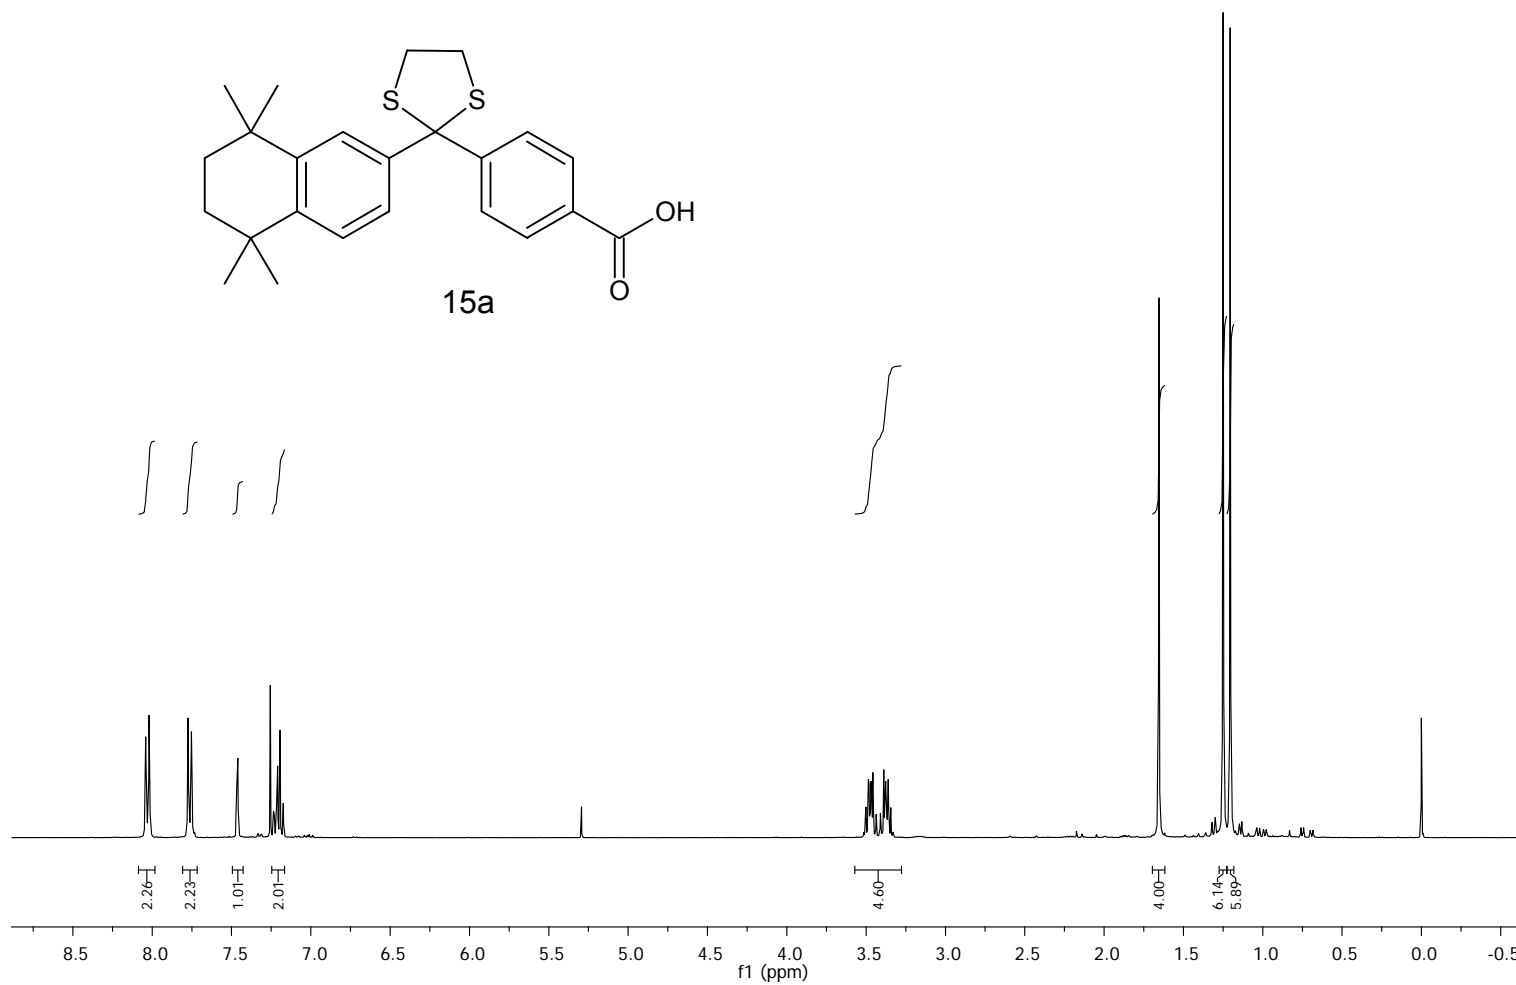

# 100 MHz <sup>13</sup>C-NMR of compound 15a in CDCl<sub>3</sub>

CMK-02-54-C13

171.58

151.50

144.44

144.10

139.98

129.80

128.49

127.83

126.30

126.21

125.33

40.28

35.02

34.99

34.35

34.03

31.78

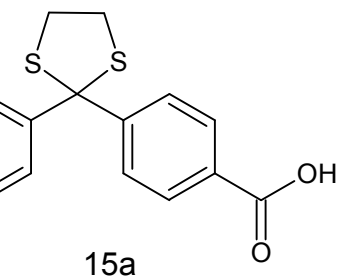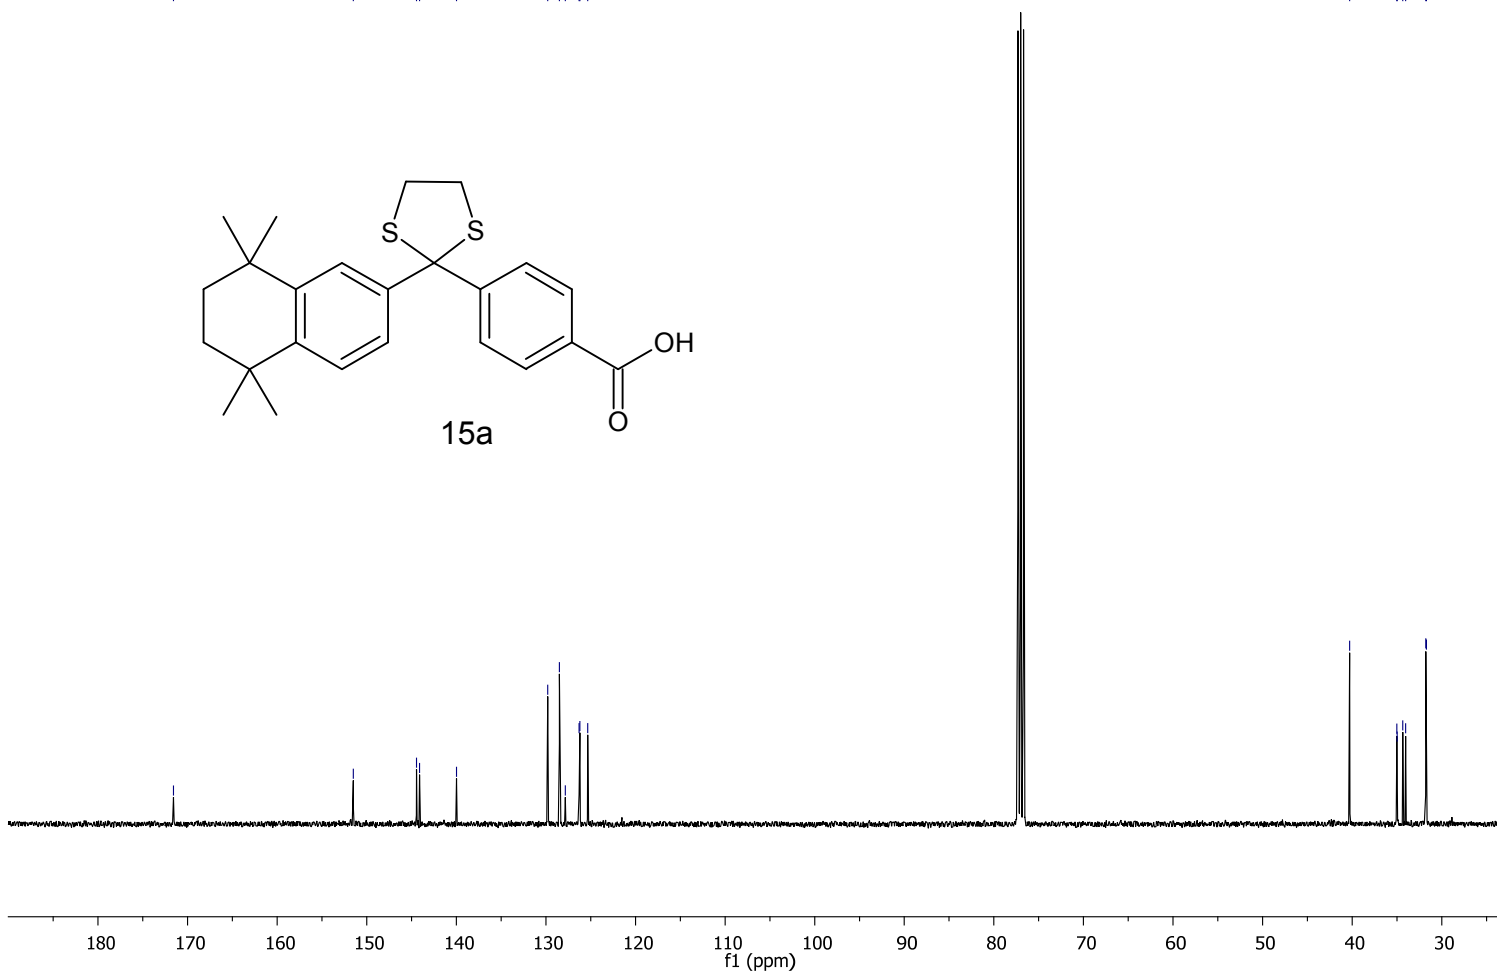

# 400 MHz $^1\text{H}$ -NMR of compound 10b in $\text{CDCl}_3$

CMK-02-64-proton

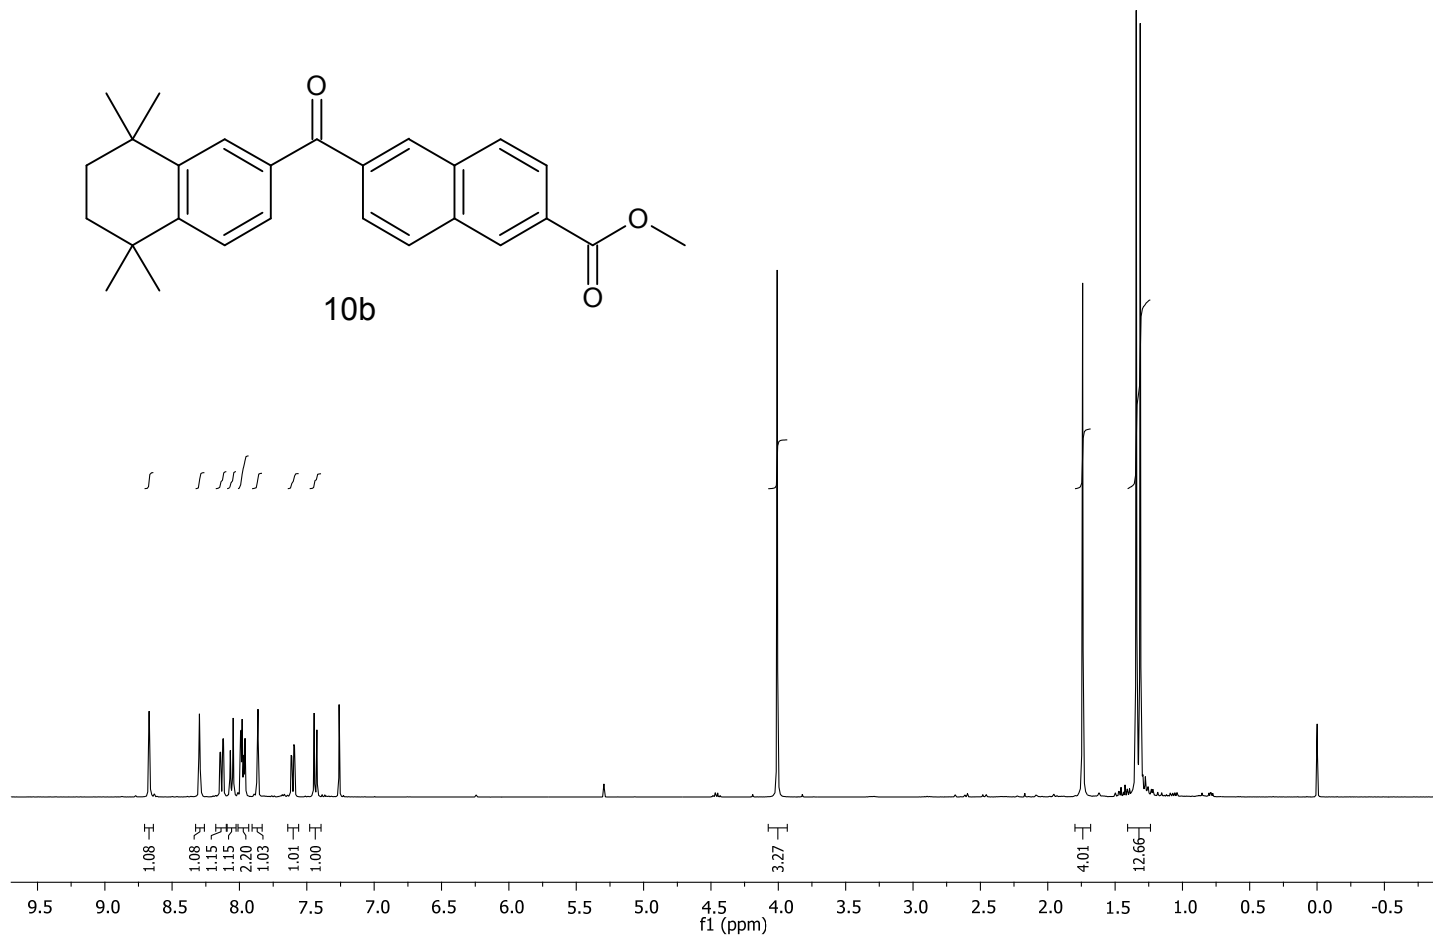

# 100 MHz <sup>13</sup>C-NMR of compound 10b in CDCl<sub>3</sub>

CMK-02-64-C13

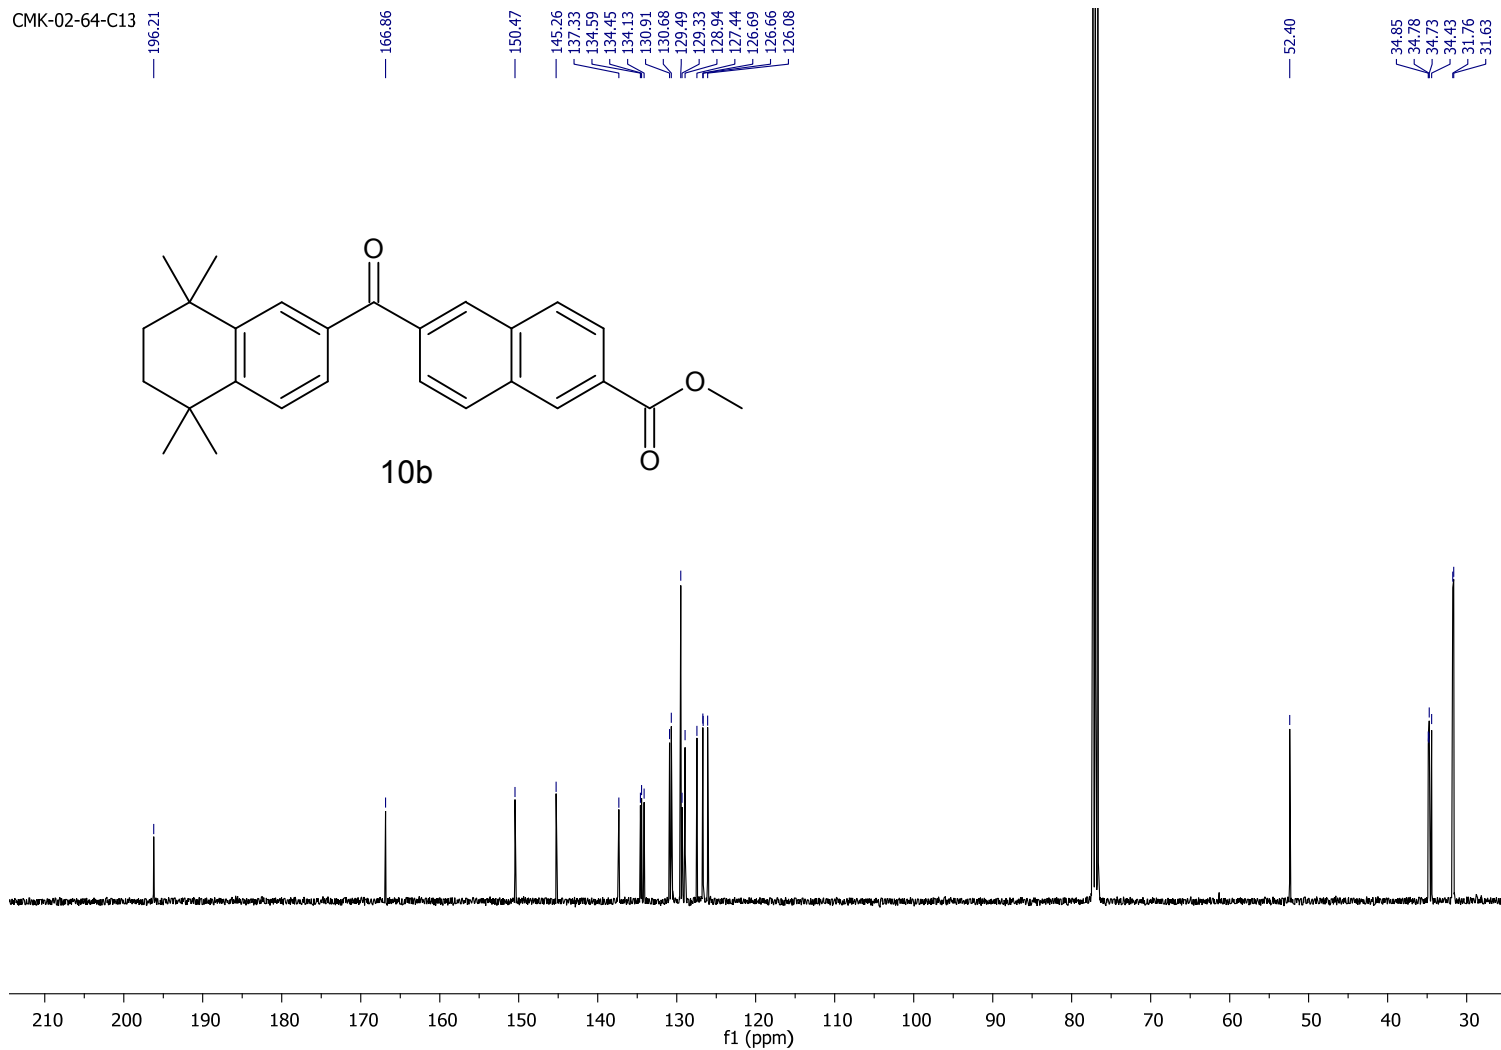

# 400 MHz $^1\text{H}$ -NMR of compound 11b in $\text{CDCl}_3/\text{CD}_3\text{OD}$ mixture

CMK-02-67-proton

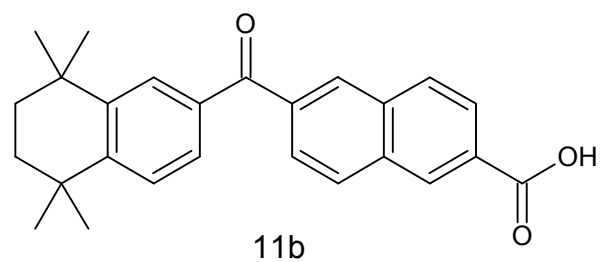

*s s s s s s*

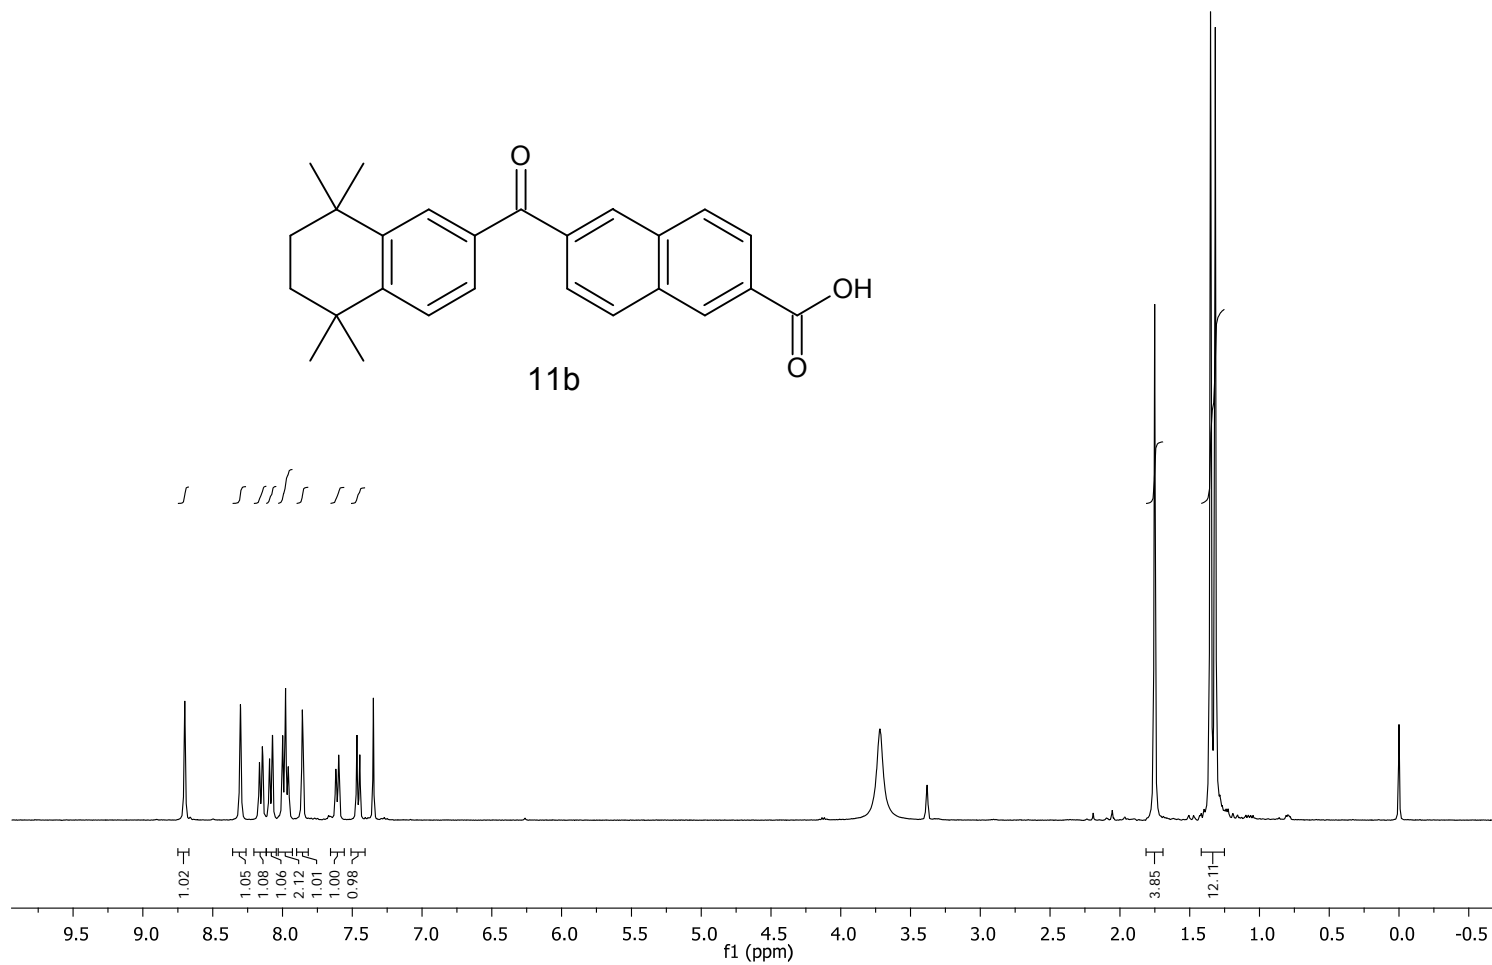

# 100 MHz $^{13}\text{C}$ -NMR of compound 11b in $\text{CDCl}_3/\text{CD}_3\text{OD}$ mixture

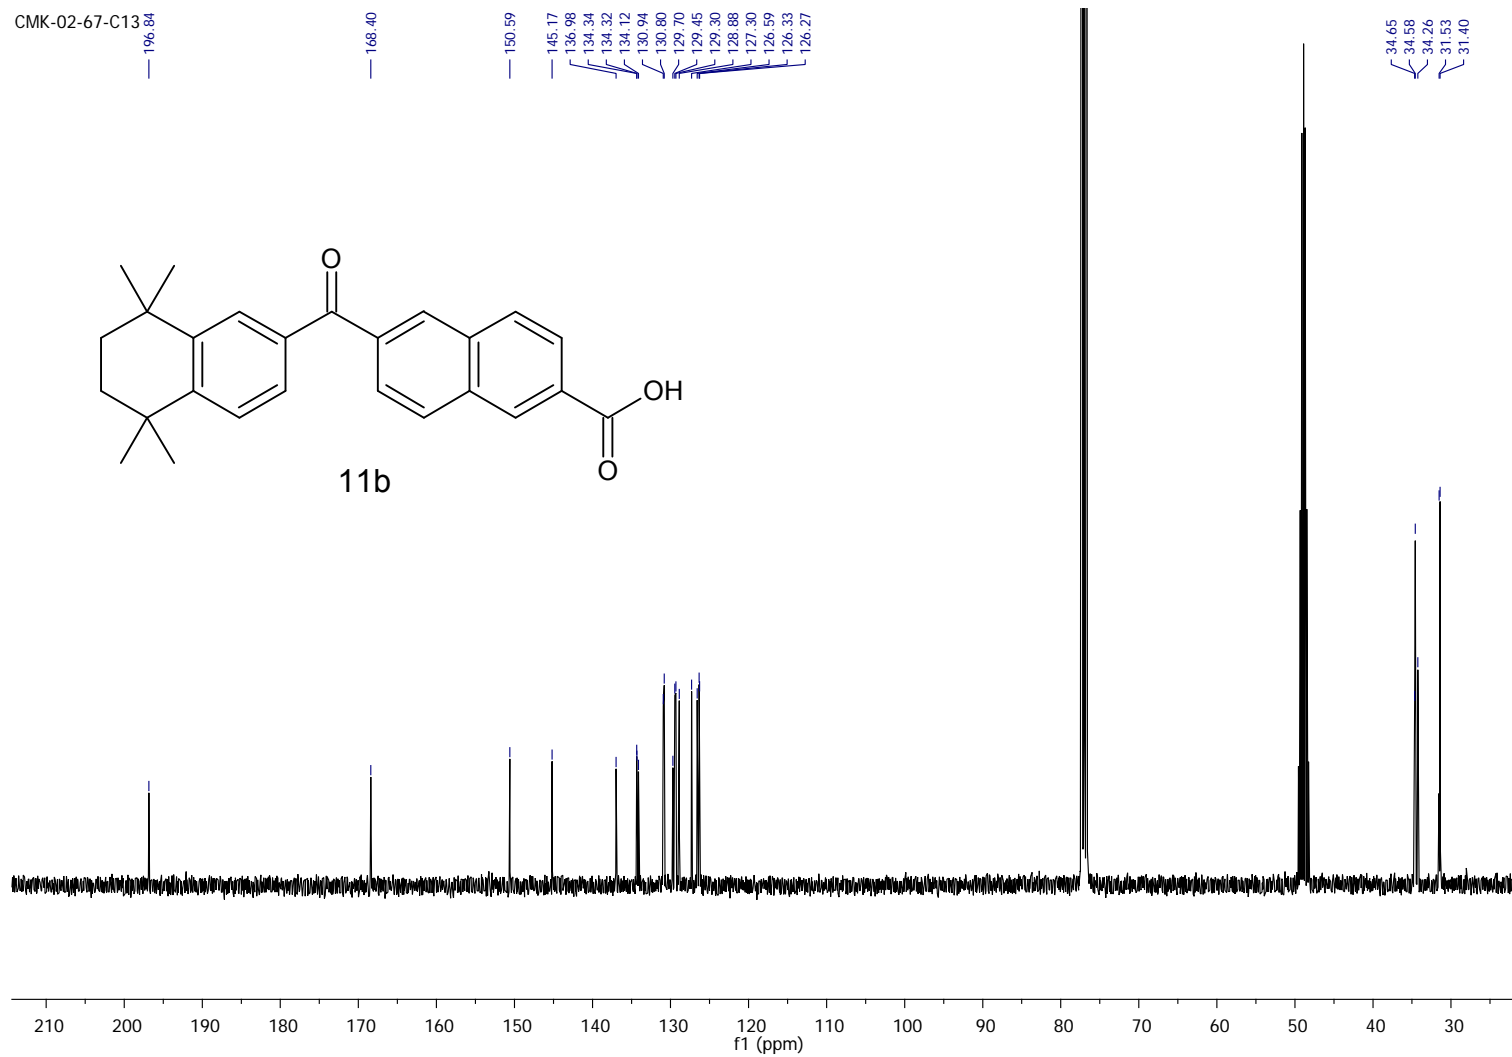

# 400 MHz $^1\text{H-NMR}$ of compound 12b in $\text{CDCl}_3$

CMK-02-65-proton

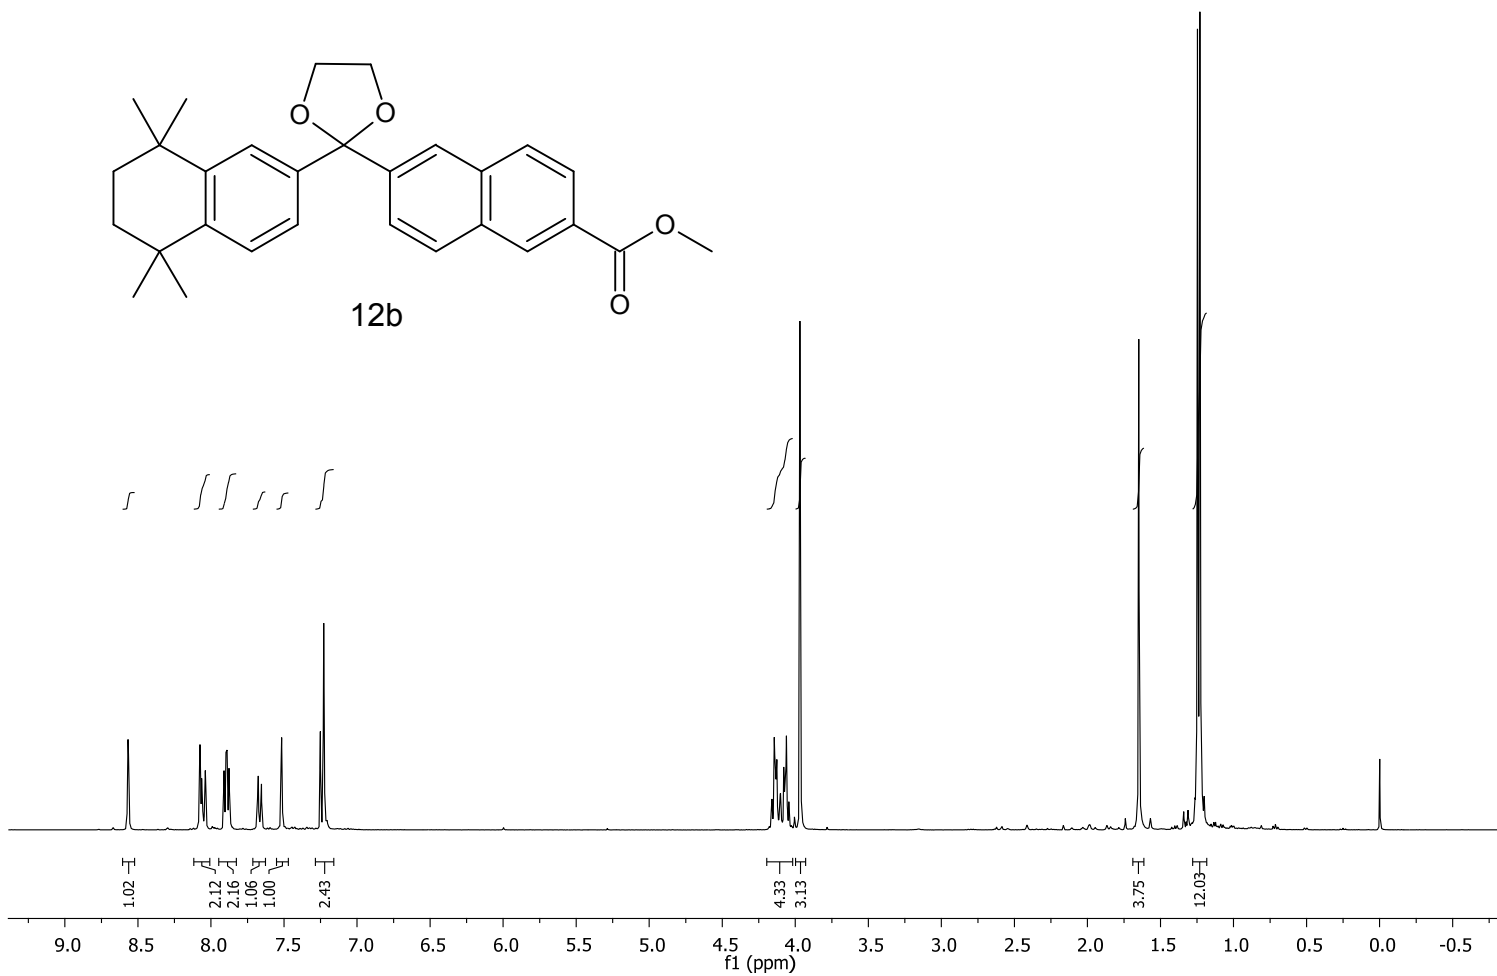



# 100 MHz $^{13}\text{C}$ -NMR of compound 12b in $\text{CDCl}_3$

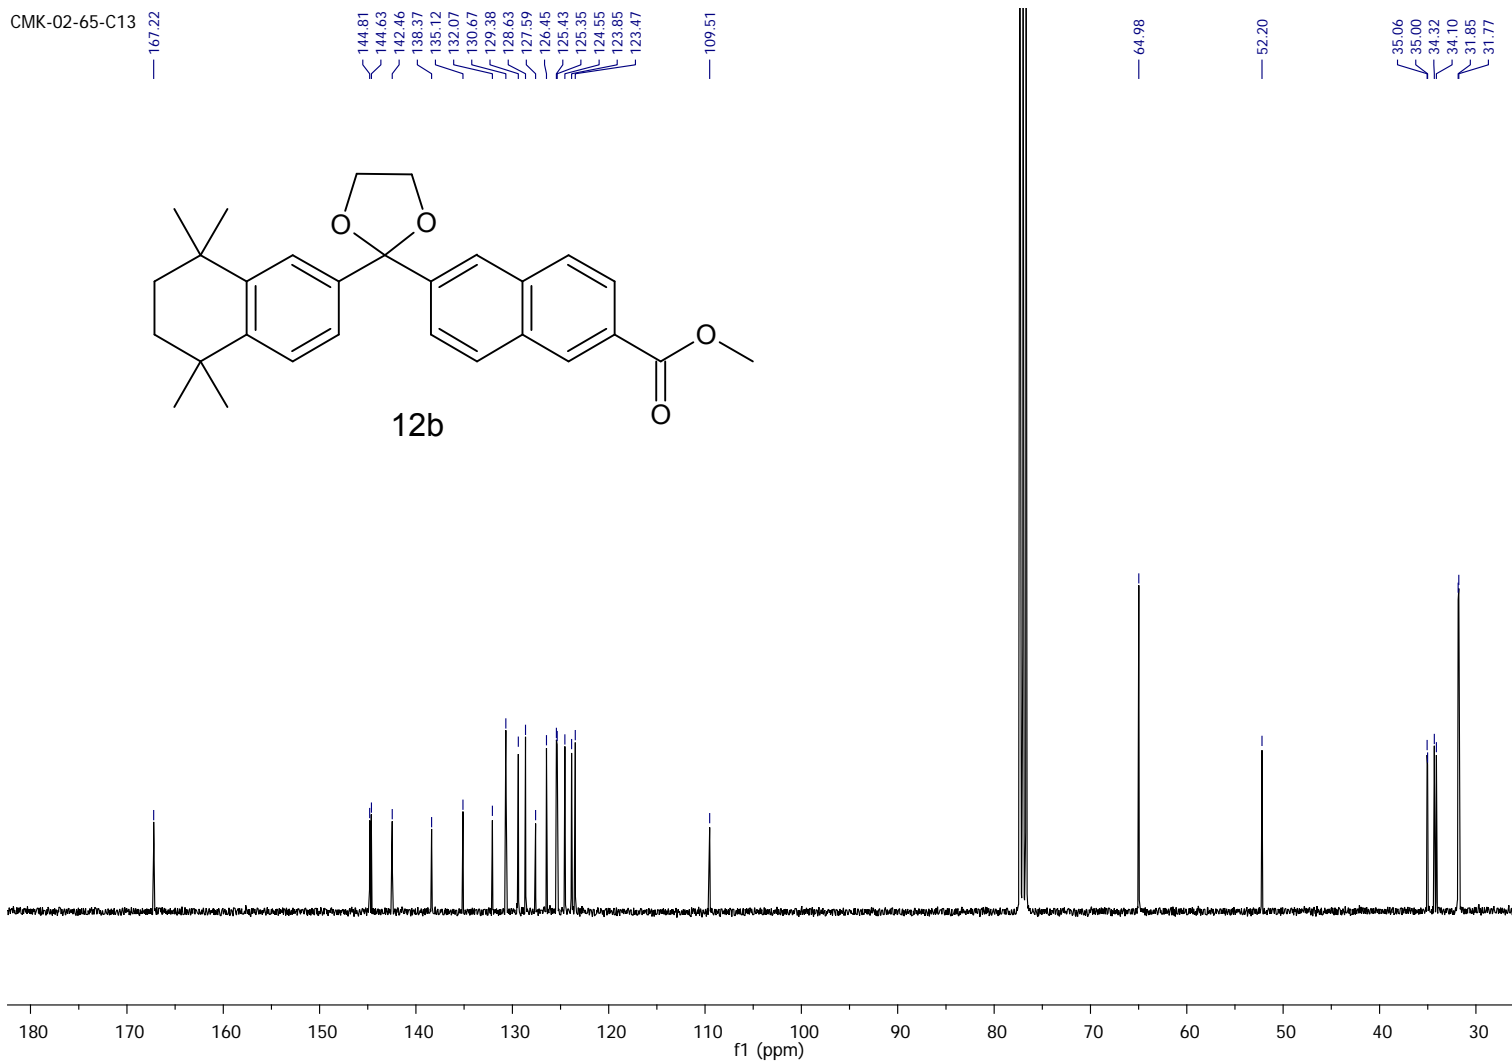



# 100 MHz $^{13}\text{C}$ -NMR of compound 13b in $\text{CDCl}_3$

CMK-02-71-proton

172.09

144.86

144.67

142.95

138.32

135.60

132.02

131.77

129.58

128.82

126.68

126.48

125.60

125.52

124.60

123.87

123.46

109.50

65.01

35.06

35.00

34.33

34.11

31.85

31.77

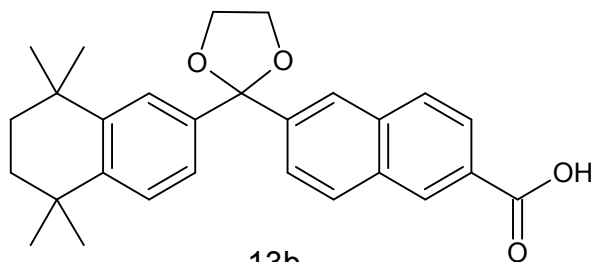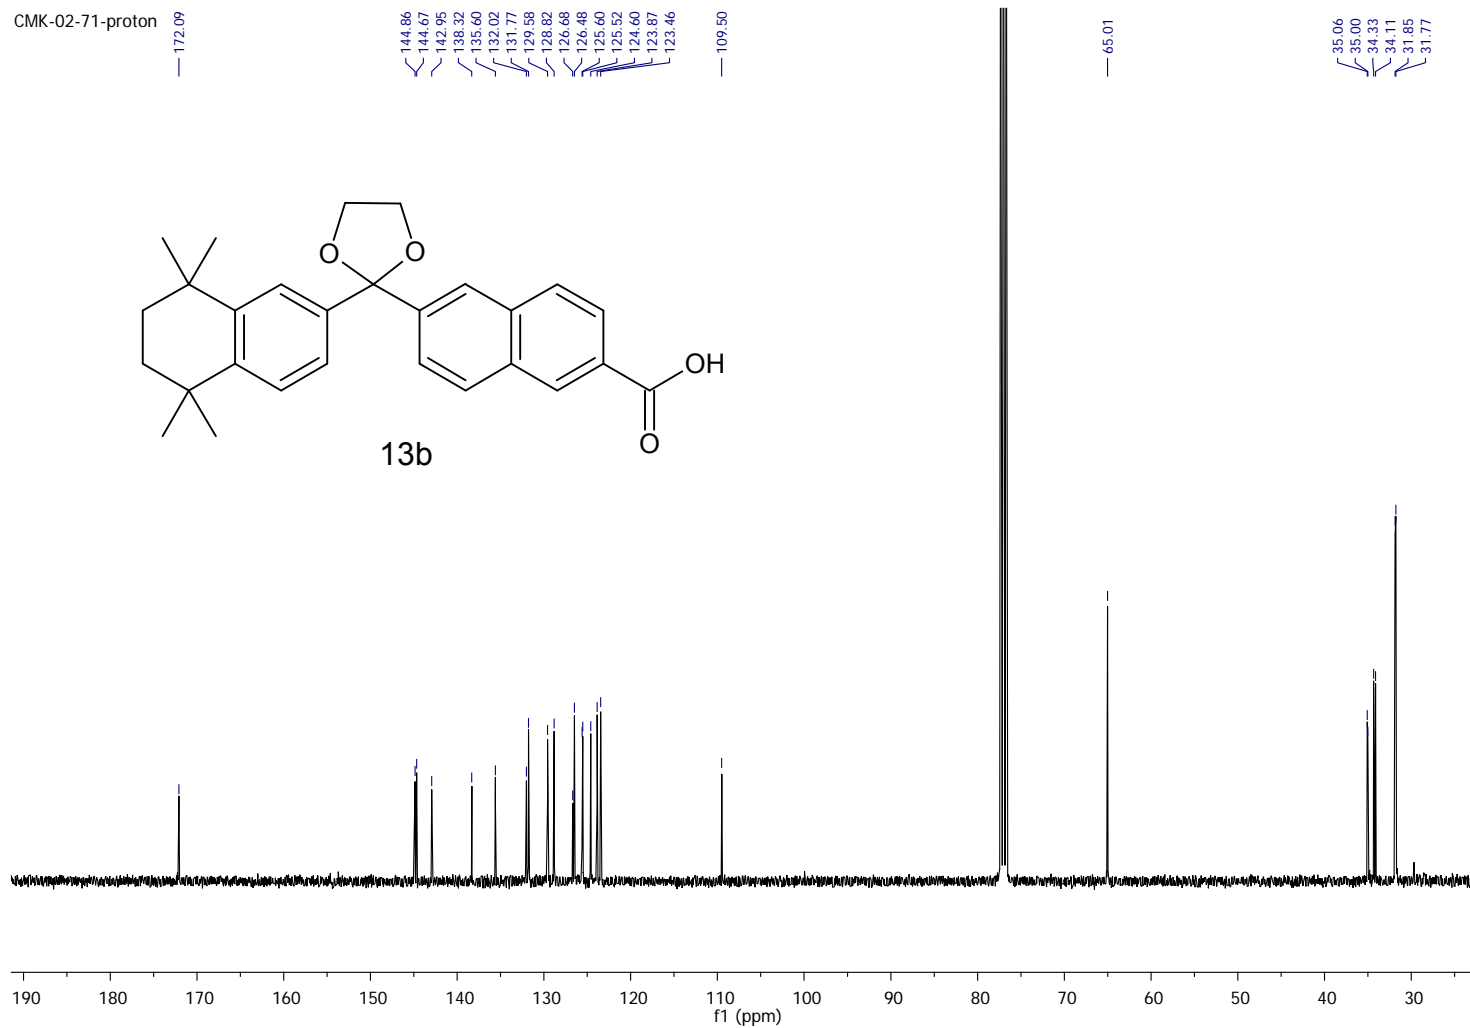

# 400 MHz $^1\text{H}$ -NMR of compound 14b in $\text{CDCl}_3$

CMK-02-66-proton

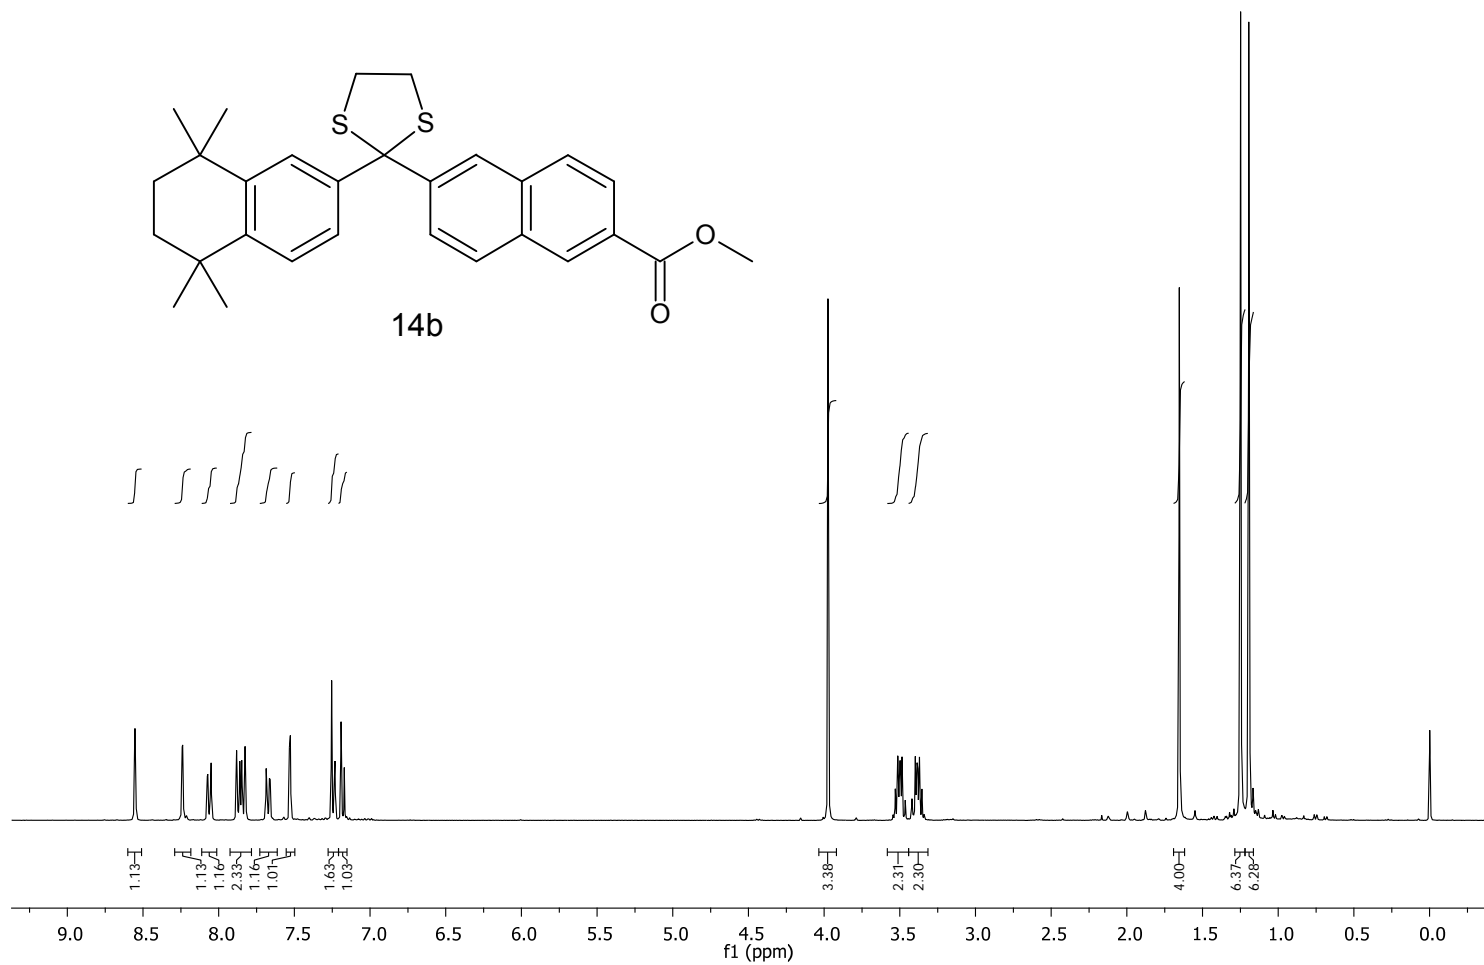

# 100 MHz $^{13}\text{C}$ -NMR of compound 14b in $\text{CDCl}_3$

CMK-02-66-C13

167.23

145.05  
144.41  
144.06  
139.86  
134.81  
131.49  
130.38  
128.91  
128.60  
128.24  
127.64  
126.36  
126.26  
125.92  
125.63  
125.53

52.20

40.18  
35.05  
35.01  
34.35  
34.04  
31.77  
31.73

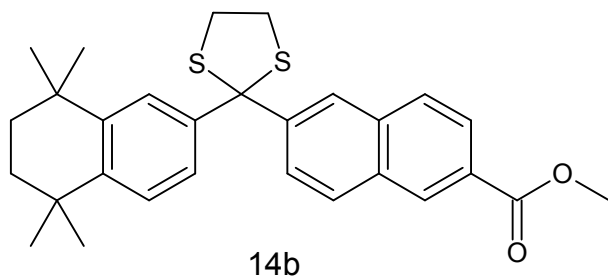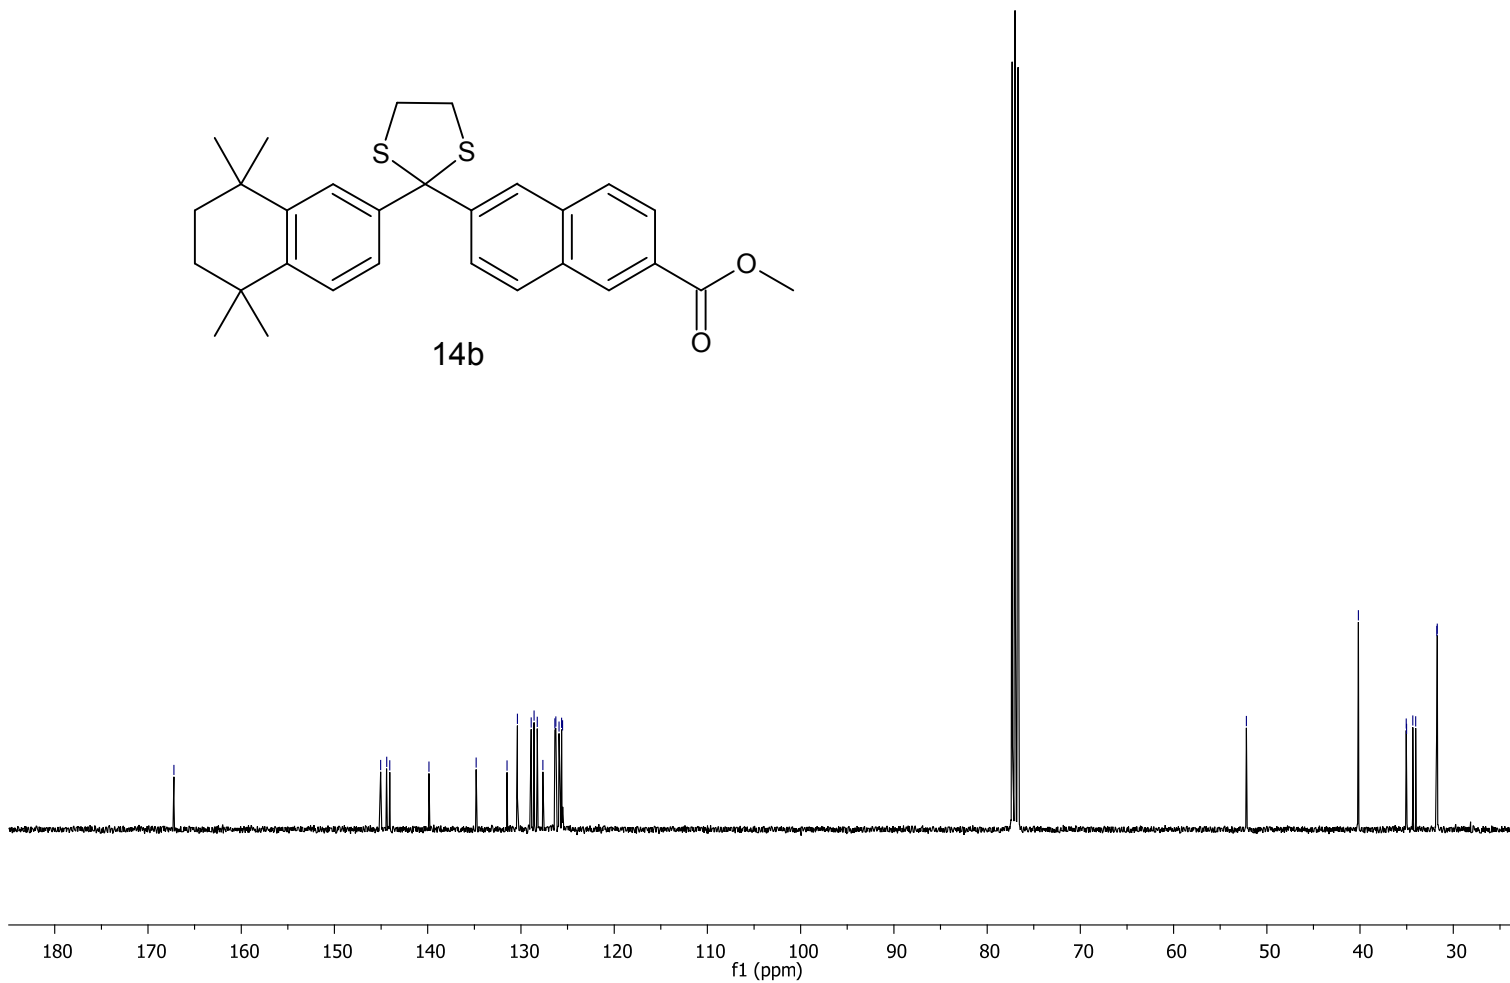

# 400 MHz $^1\text{H-NMR}$ of compound 15b in $\text{DMSO-D}_6$

CMK-02-69-proton

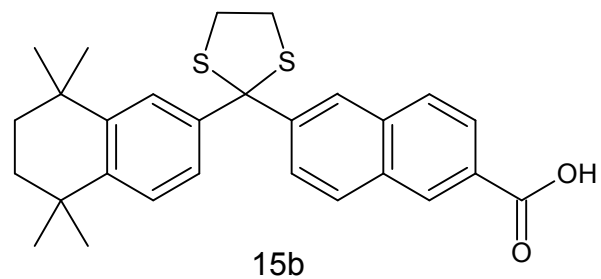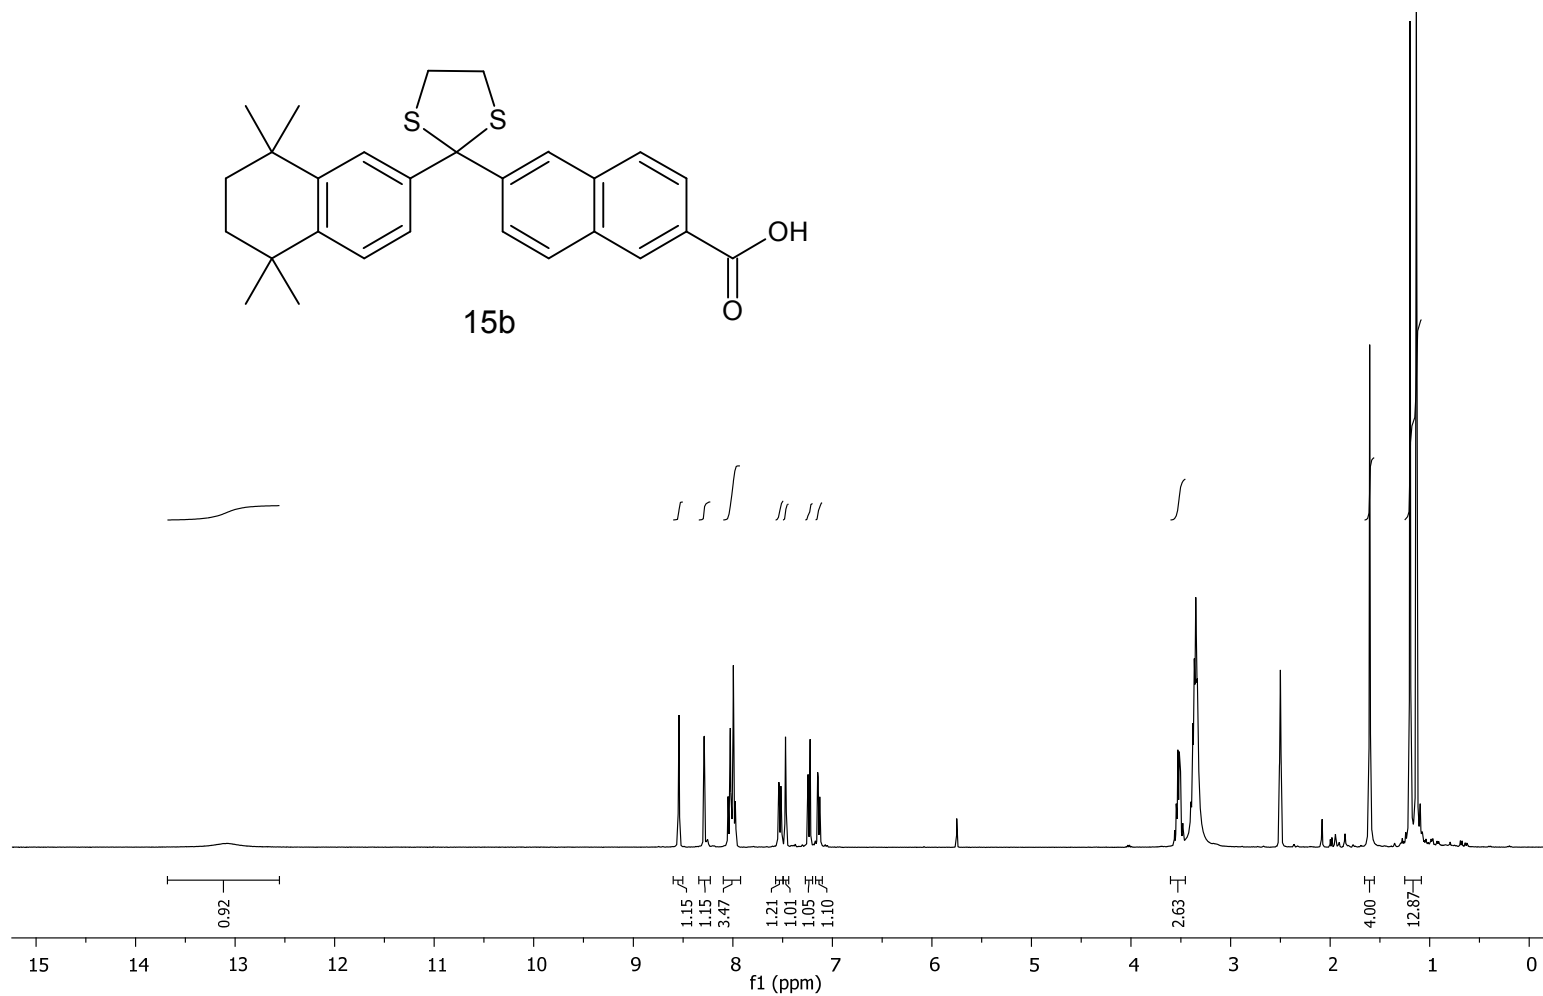

# 100 MHz $^{13}\text{C}$ -NMR of compound 15b in $\text{DMSO-D}_6$

CMK-02-69-C13

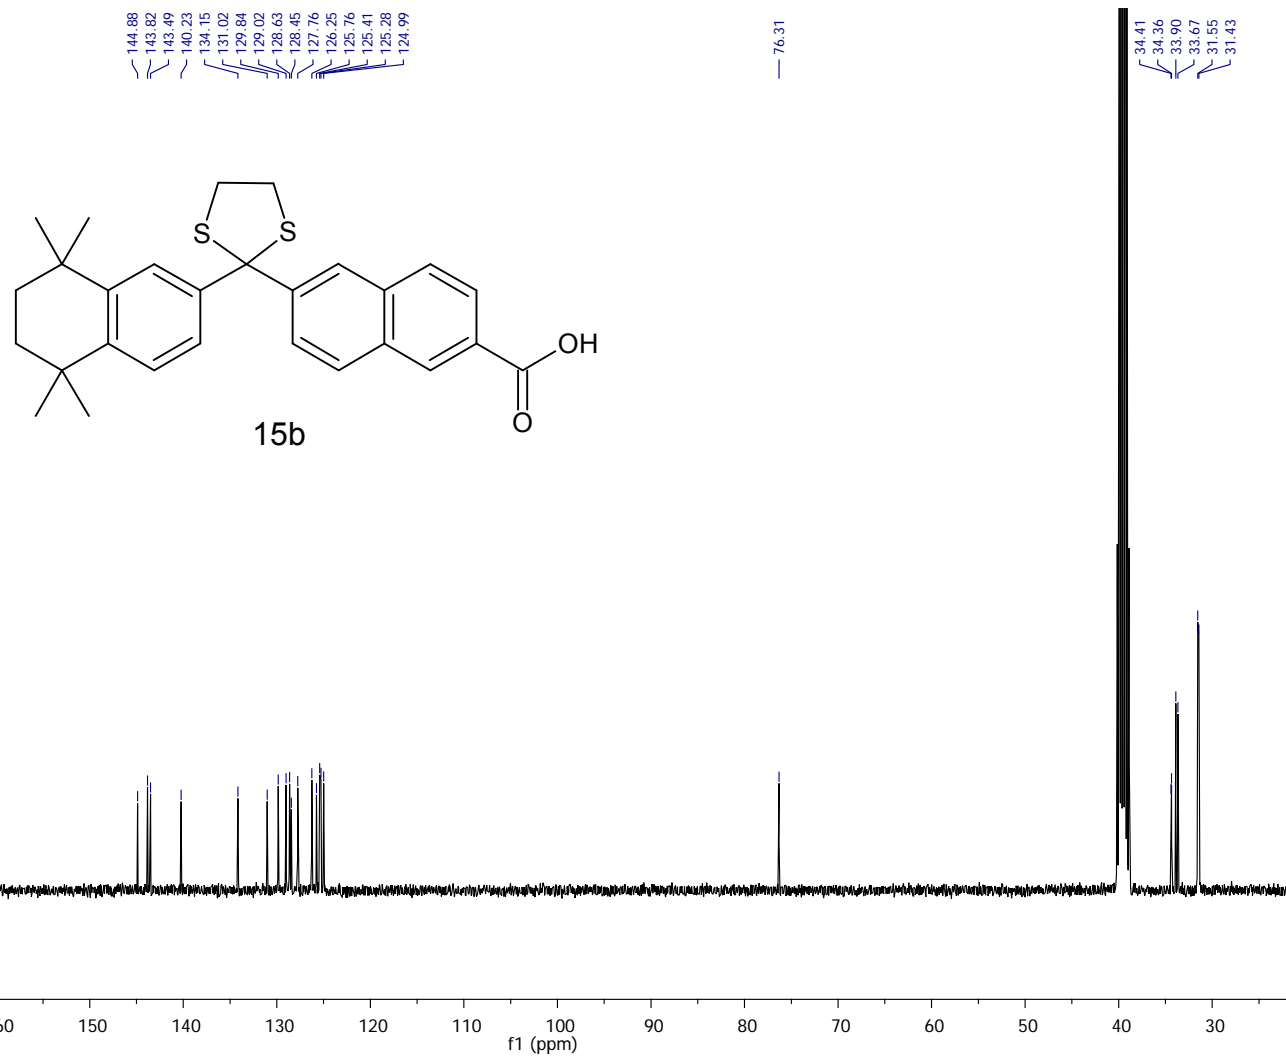

# 400 MHz $^1\text{H}$ -NMR of compound 16 in $\text{CDCl}_3$

CMK-02-100-proton

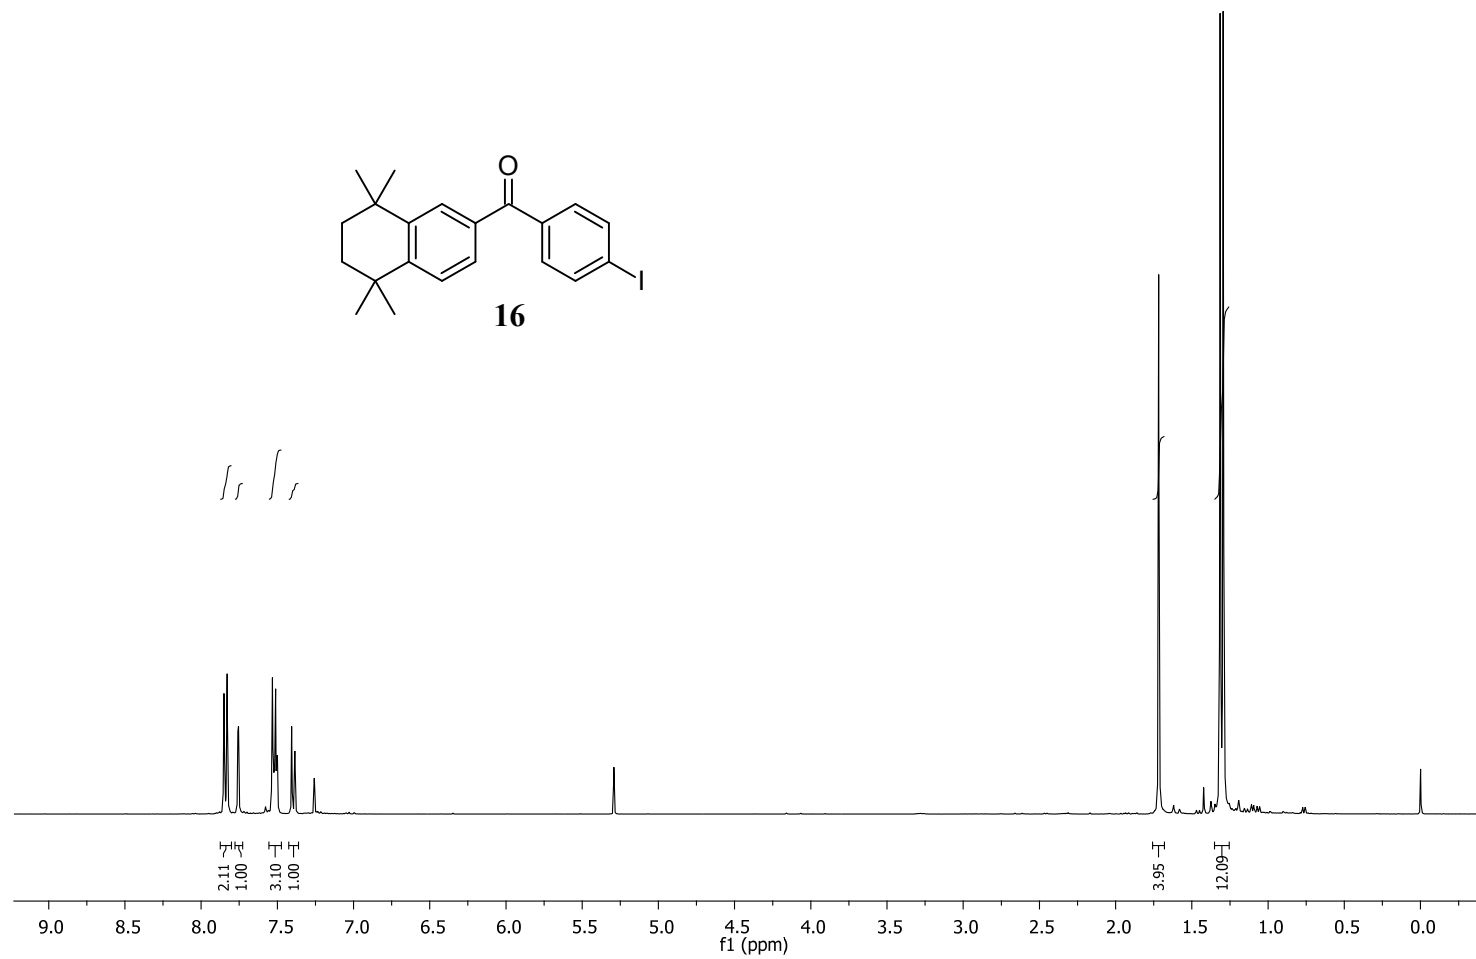



# 100 MHz $^{13}\text{C}$ -NMR of compound 16 in $\text{CDCl}_3$

CMK-02-100-

195.71

150.44

145.20

137.43

137.31

134.27

131.42

128.72

127.21

126.63

99.67

34.81

34.73

34.69

34.39

31.74

31.60

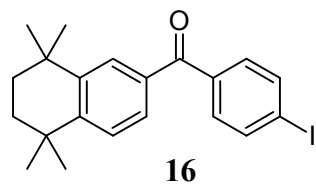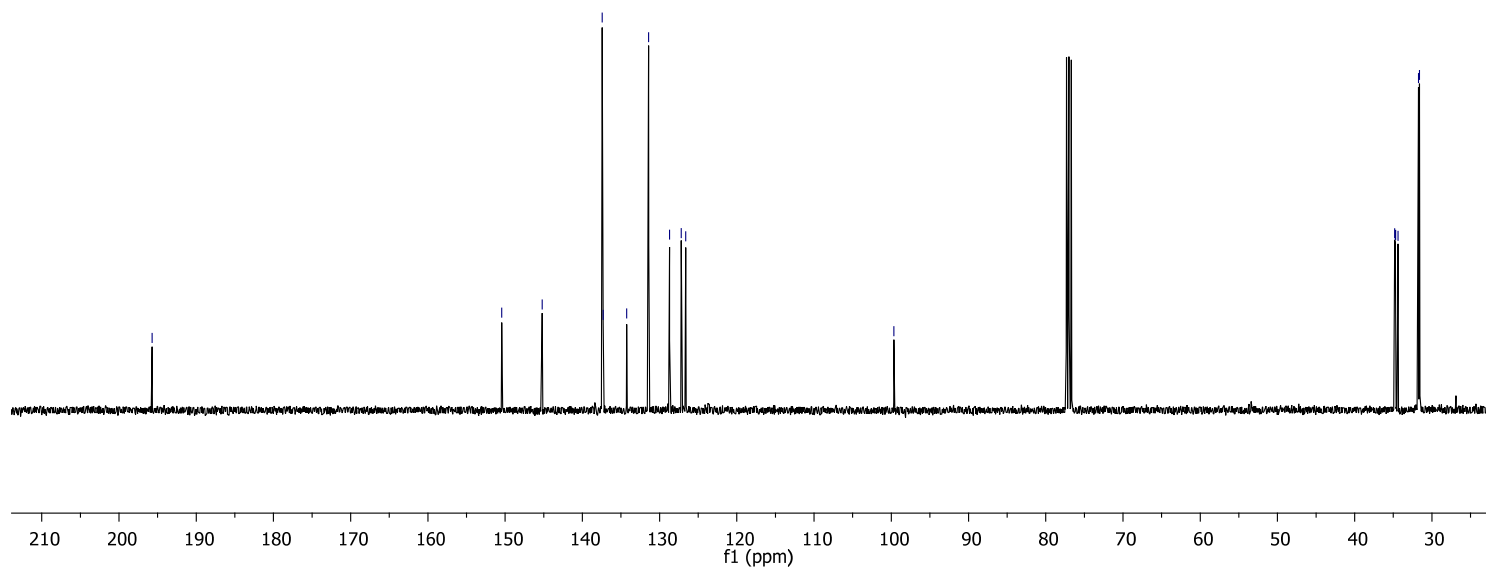

# 400 MHz $^1\text{H-NMR}$ of compound 17 in $\text{CDCl}_3$

CMK-02-102-proton

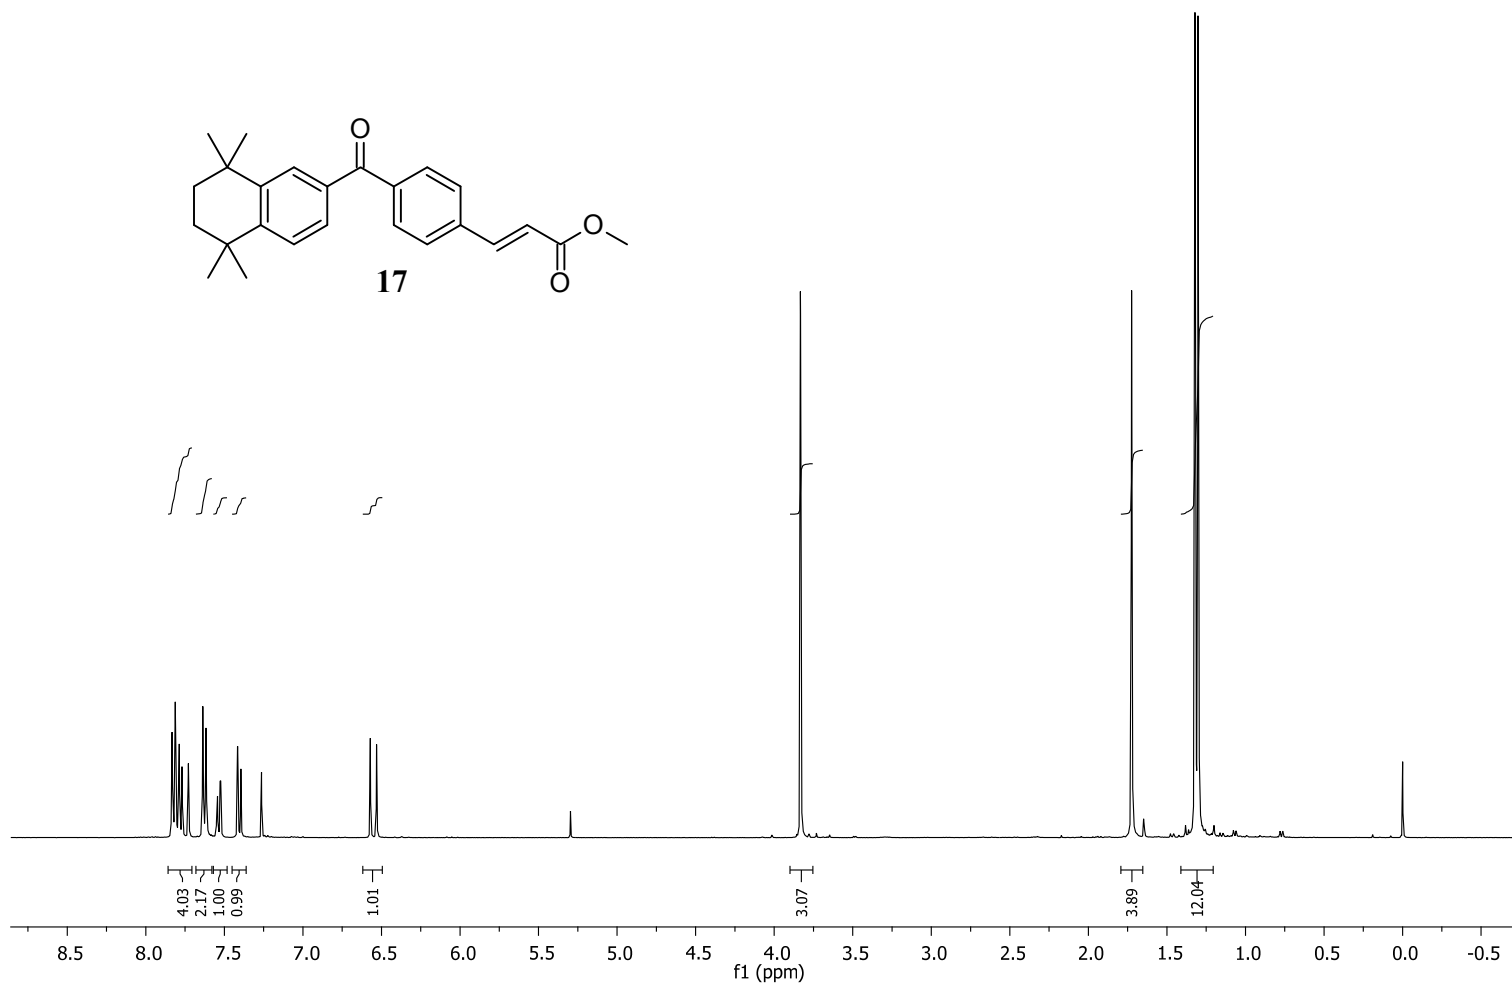

# 100 MHz $^{13}\text{C}$ -NMR of compound 17 in $\text{CDCl}_3$

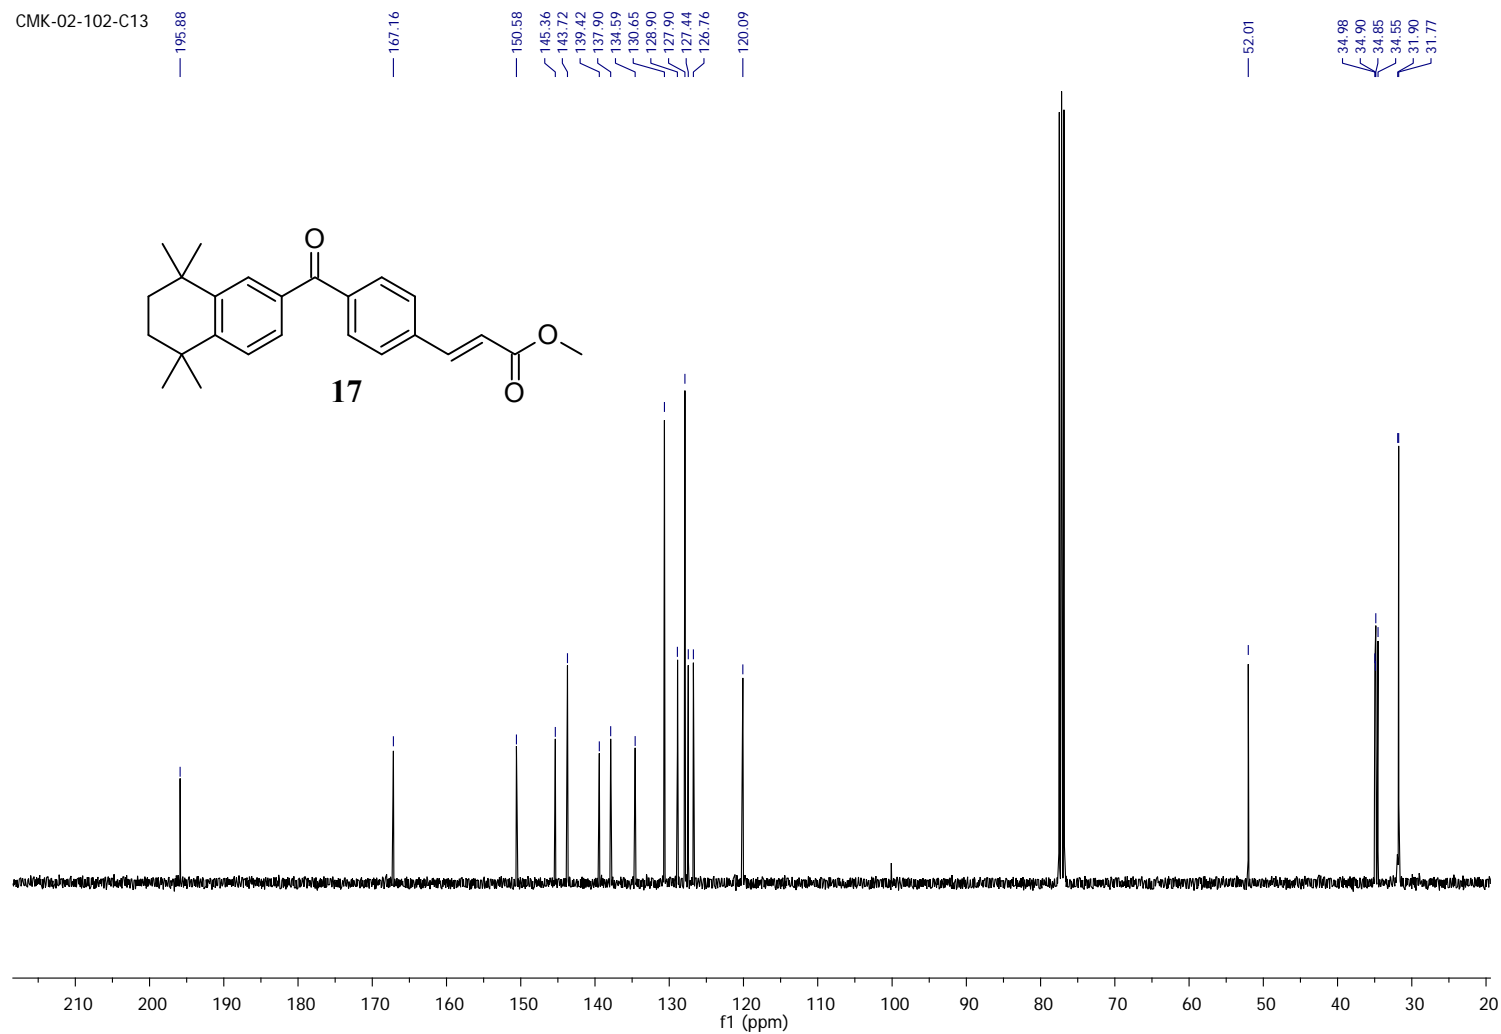

# 400 MHz $^1\text{H-NMR}$ of compound 18 in $\text{CDCl}_3$

CMK-02-104A2-proton

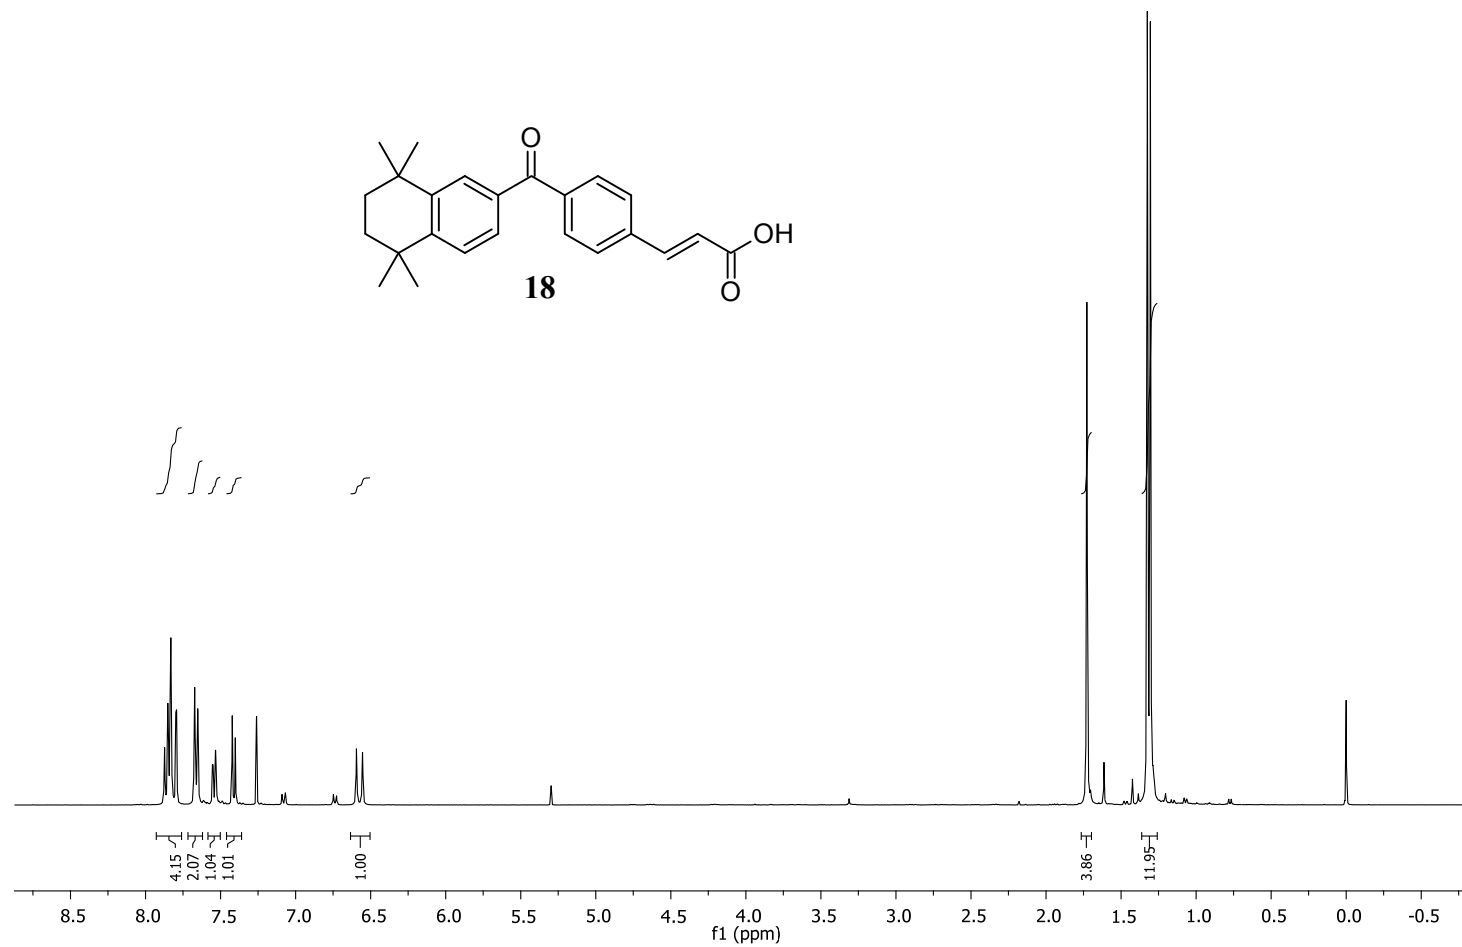

# 100 MHz $^{13}\text{C}$ -NMR of compound 18 in $\text{CDCl}_3$

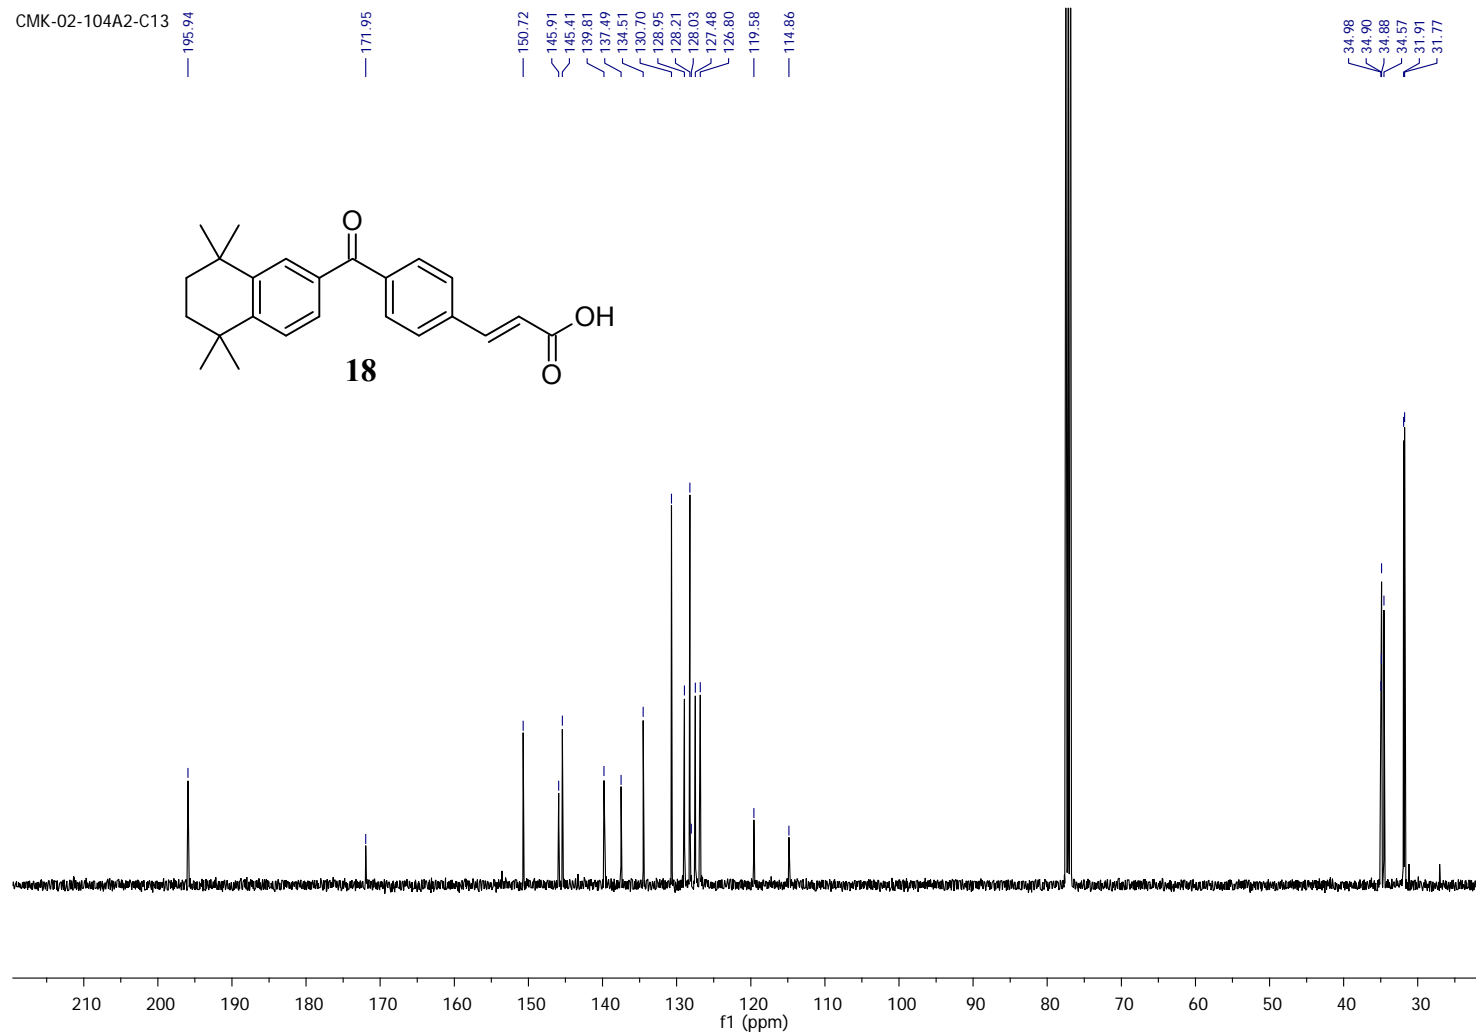

# 400 MHz $^1\text{H-NMR}$ of compound **19** in $\text{CDCl}_3$

CMK-02-105-proton

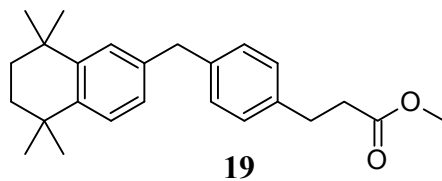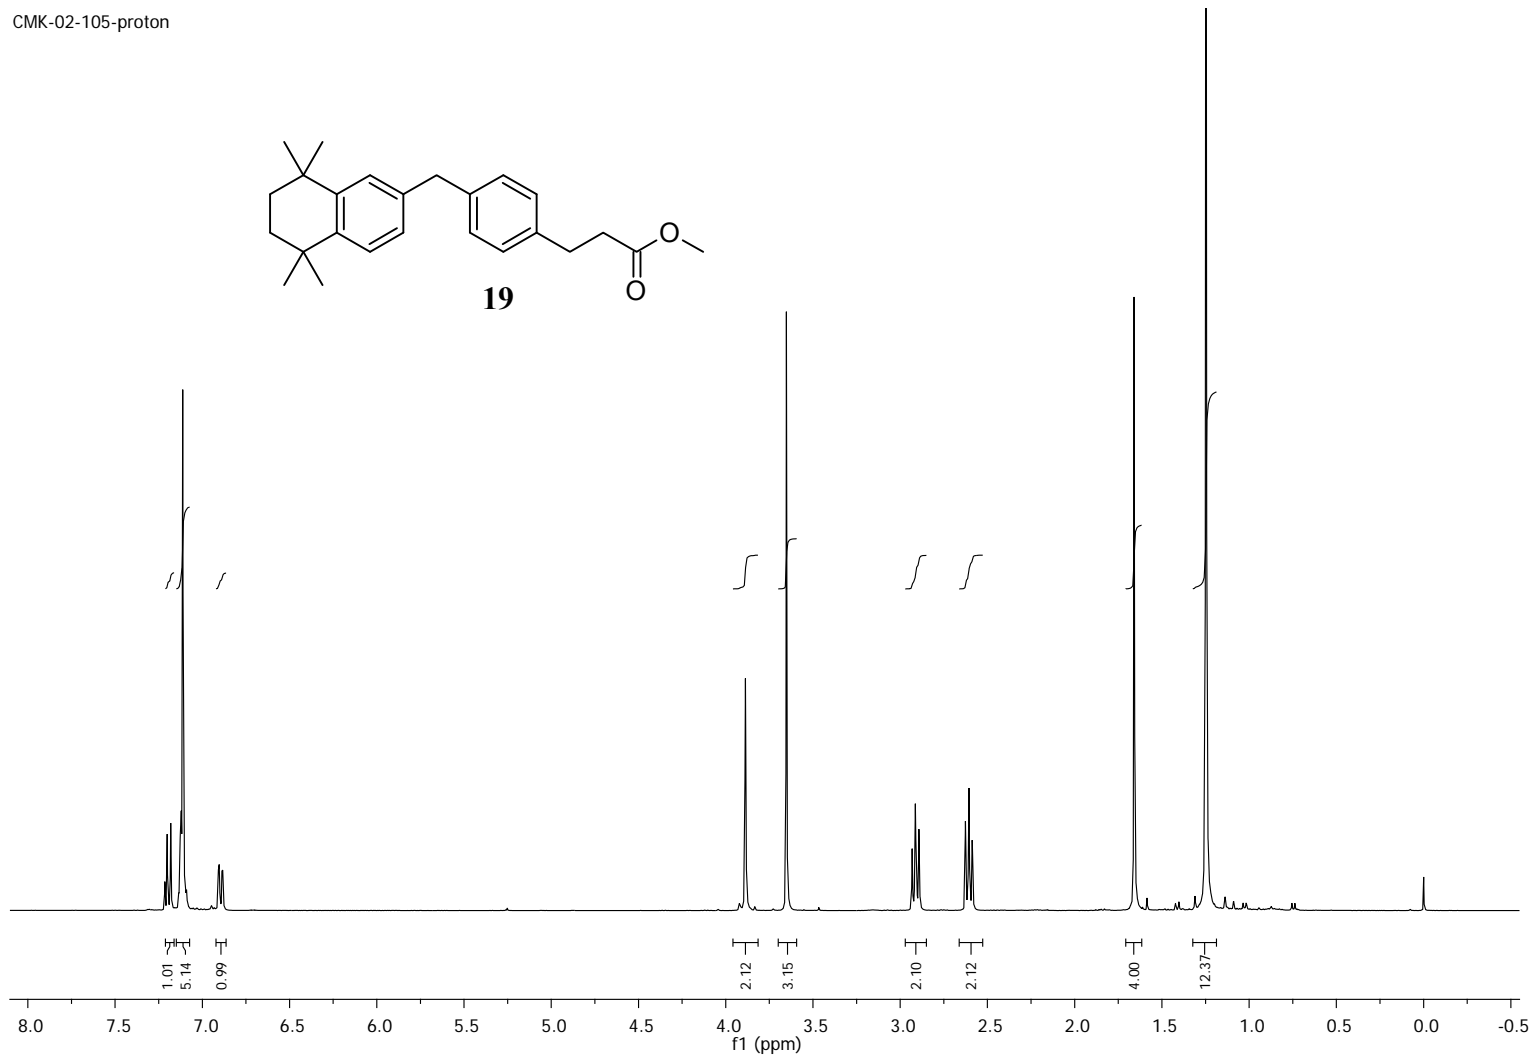

# 100 MHz $^{13}\text{C}$ -NMR of compound 19 in $\text{CDCl}_3$

CMK-02-105-C13

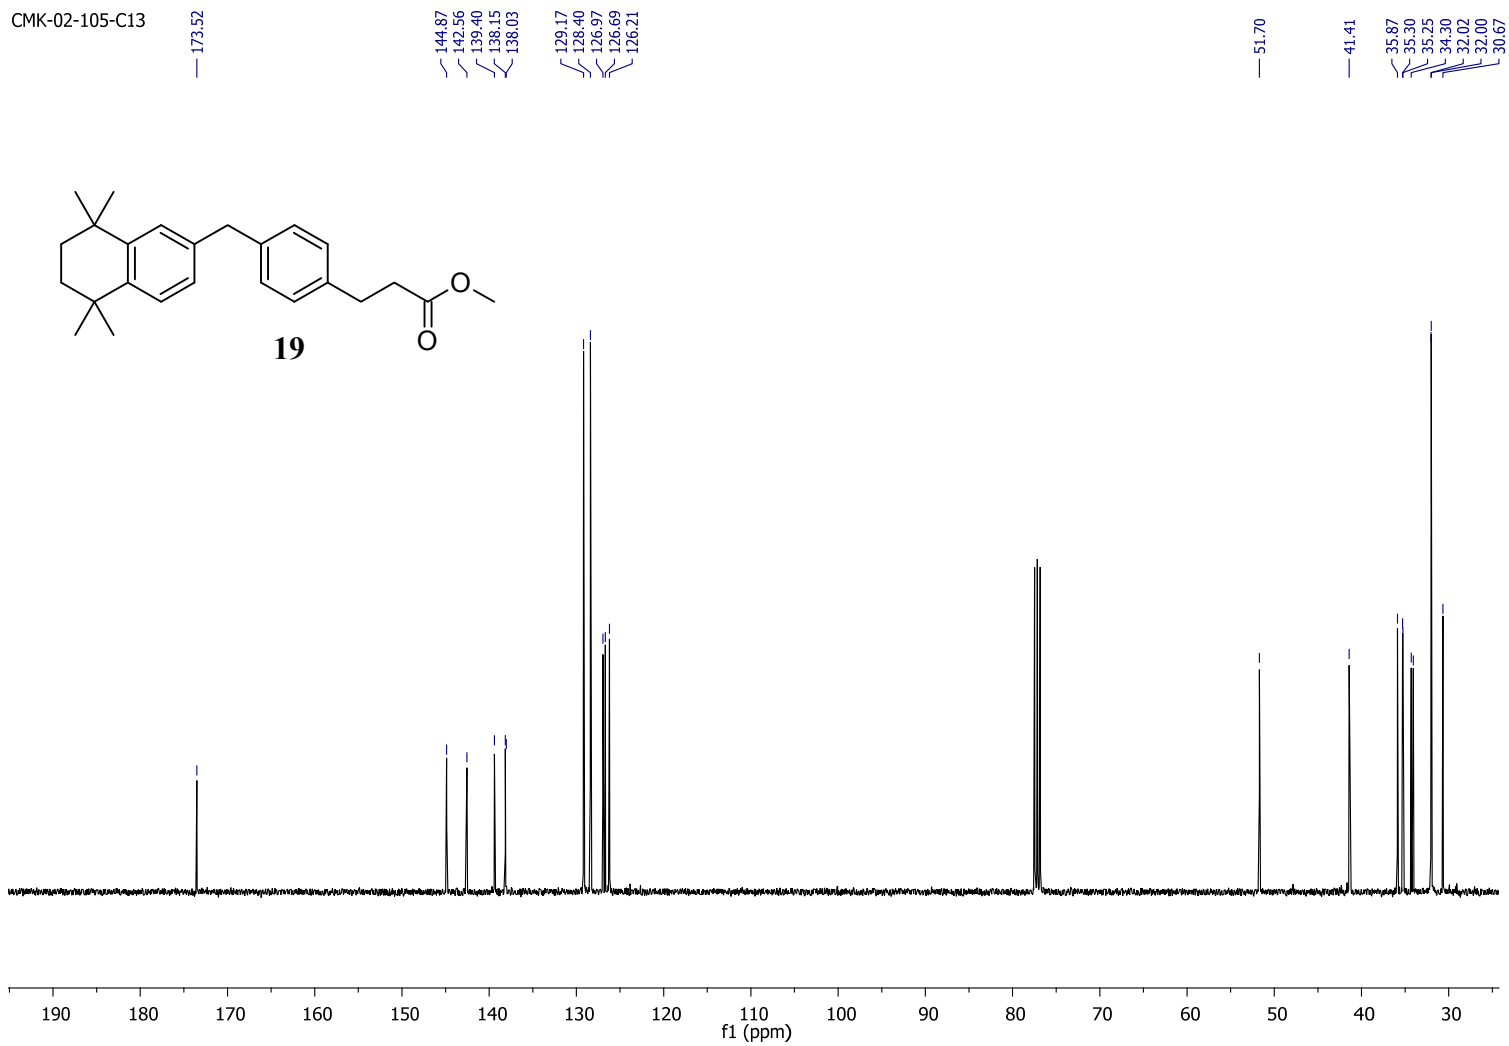

# 400 MHz $^1\text{H}$ -NMR of compound 20 in $\text{CDCl}_3$

CMK-02-106-proton

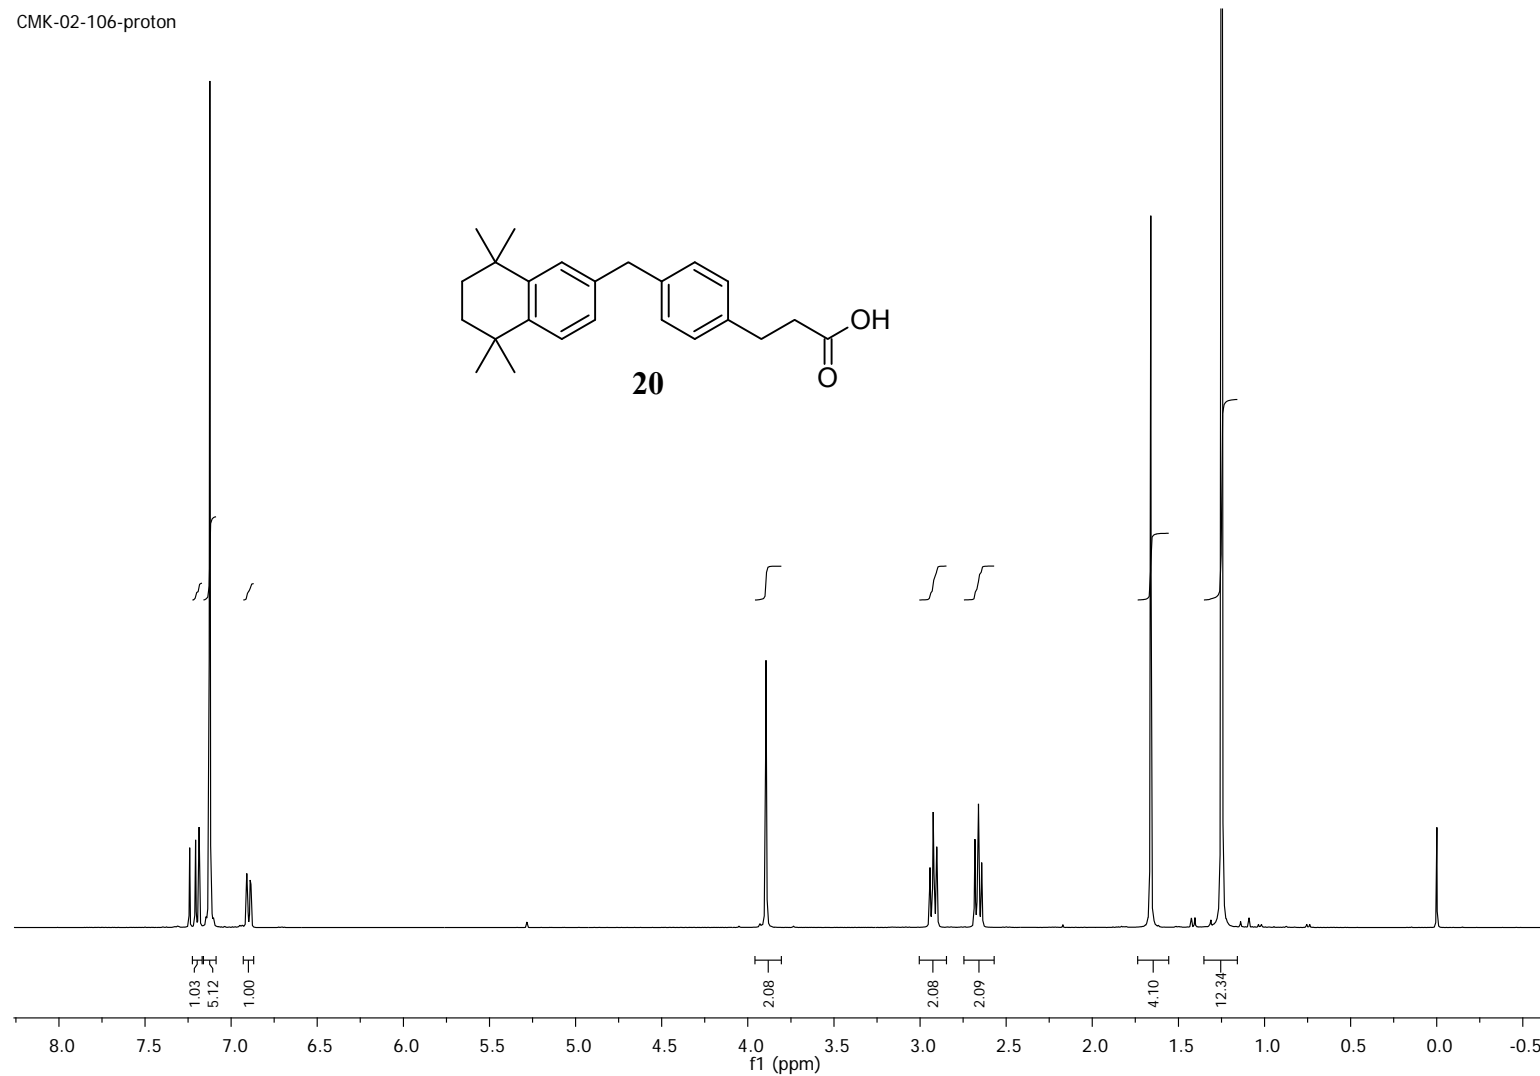



# 100 MHz $^{13}\text{C}$ -NMR of compound 20 in $\text{CDCl}_3$

CMK-02-106-C13

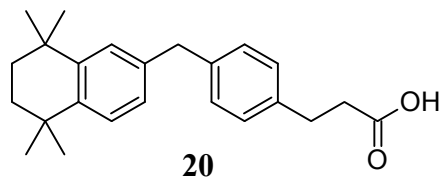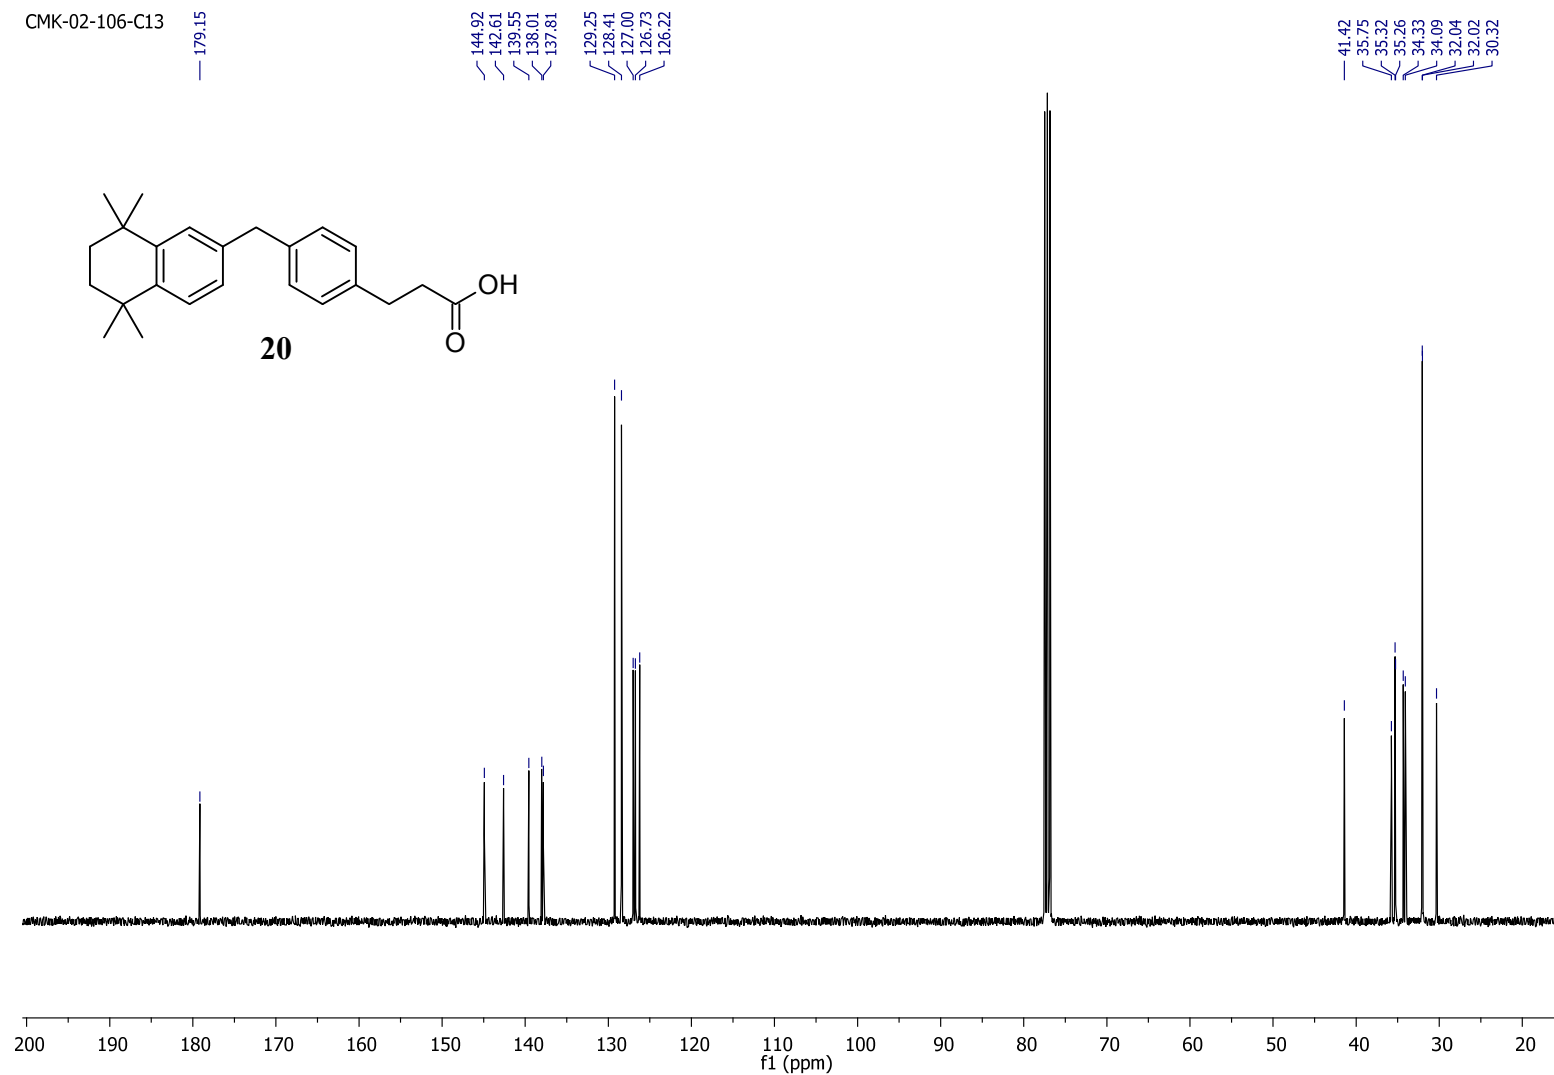

# 400 MHz $^1\text{H-NMR}$ of compound 21 in $\text{CDCl}_3$

CMK-02-115-proton

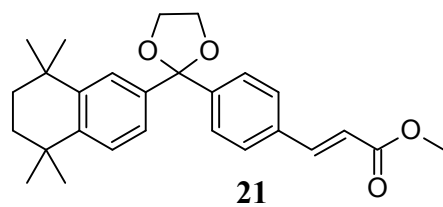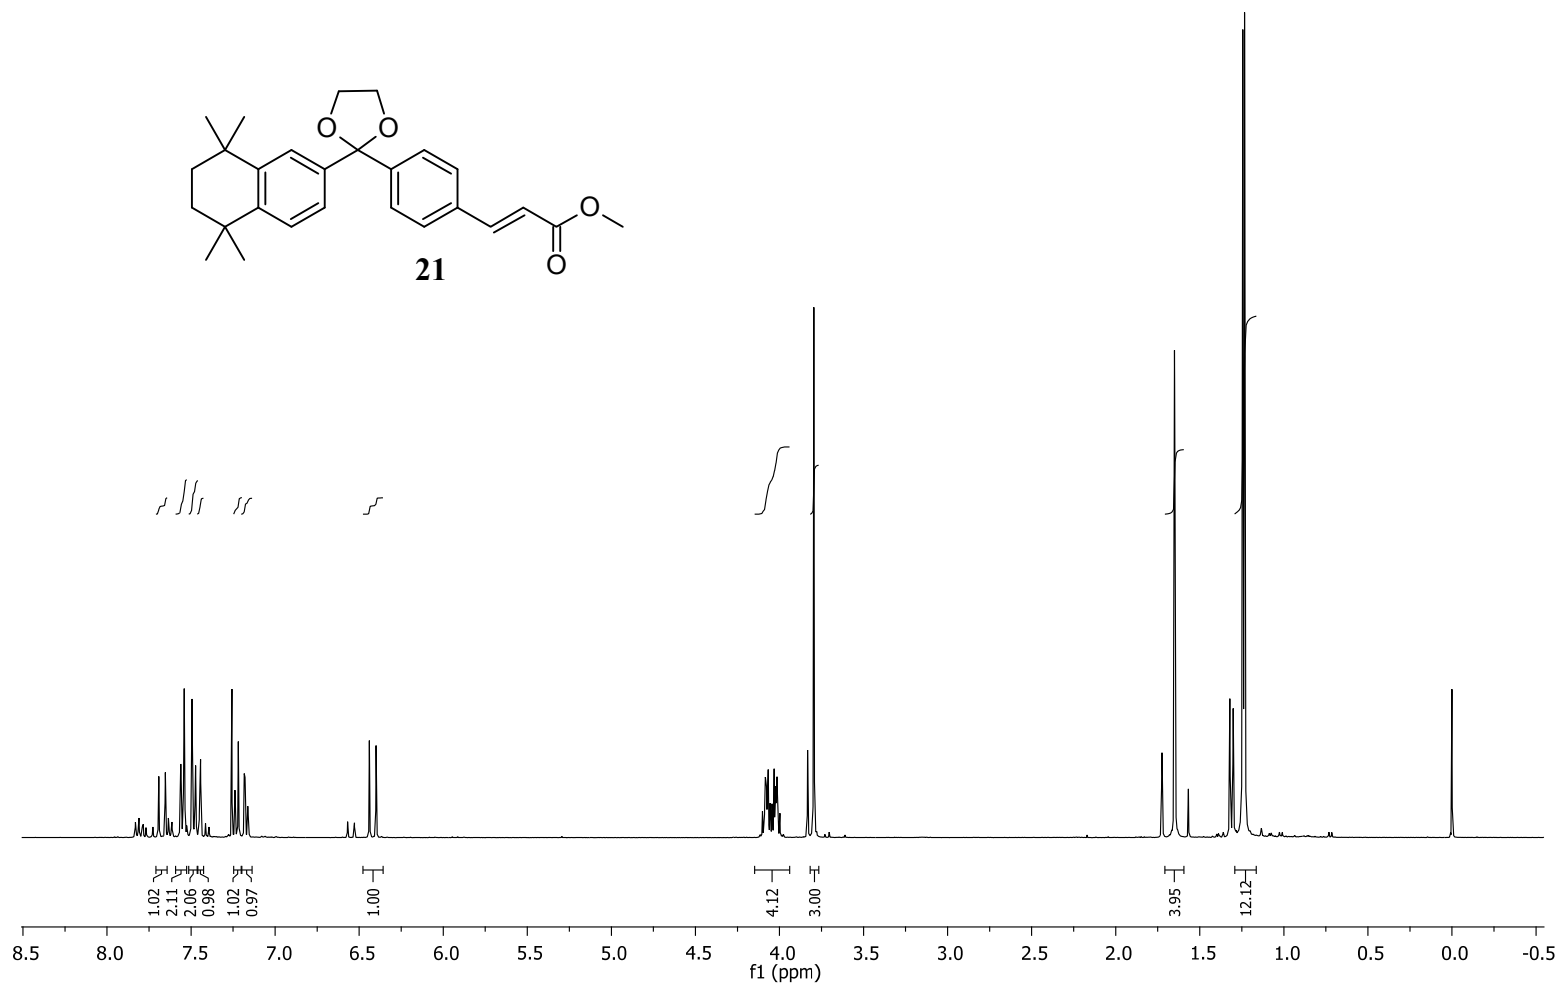

# 100 MHz <sup>13</sup>C-NMR of compound 21 in CDCl<sub>3</sub>

CMK-02-115-C13

167.56

144.94

144.92

144.77

144.62

138.51

134.09

128.06

126.86

126.60

123.91

123.47

118.03

109.42

77.48

77.16

76.84

65.02

51.84

35.22

35.16

34.47

34.25

32.00

31.93

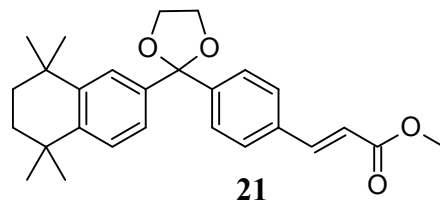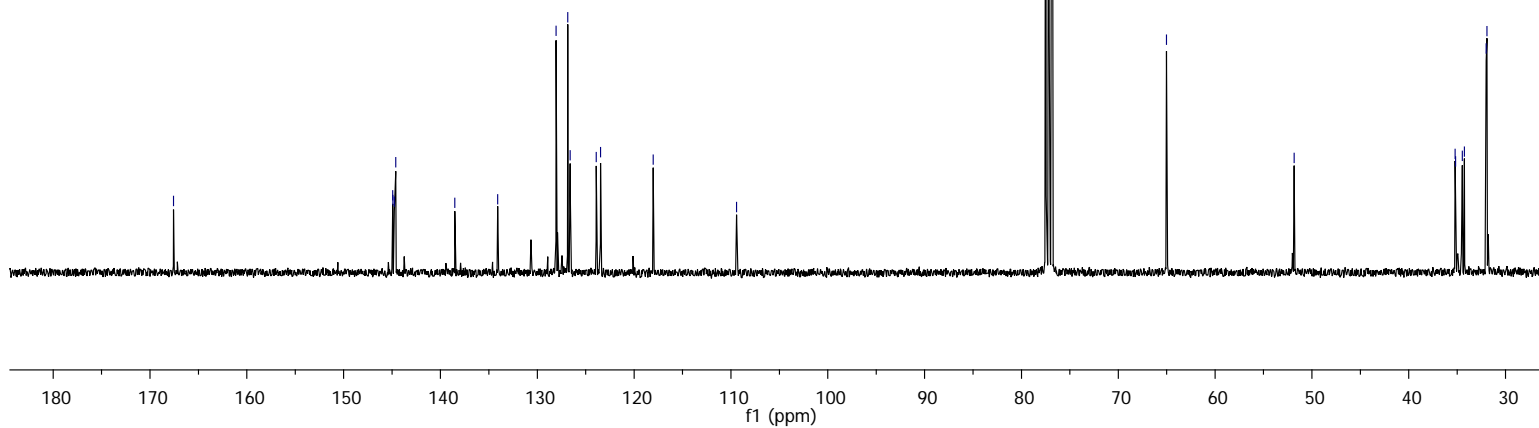

# 400 MHz $^1\text{H-NMR}$ of compound 22 in $\text{CDCl}_3$

CMK-02-116-proton

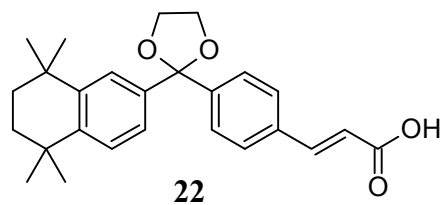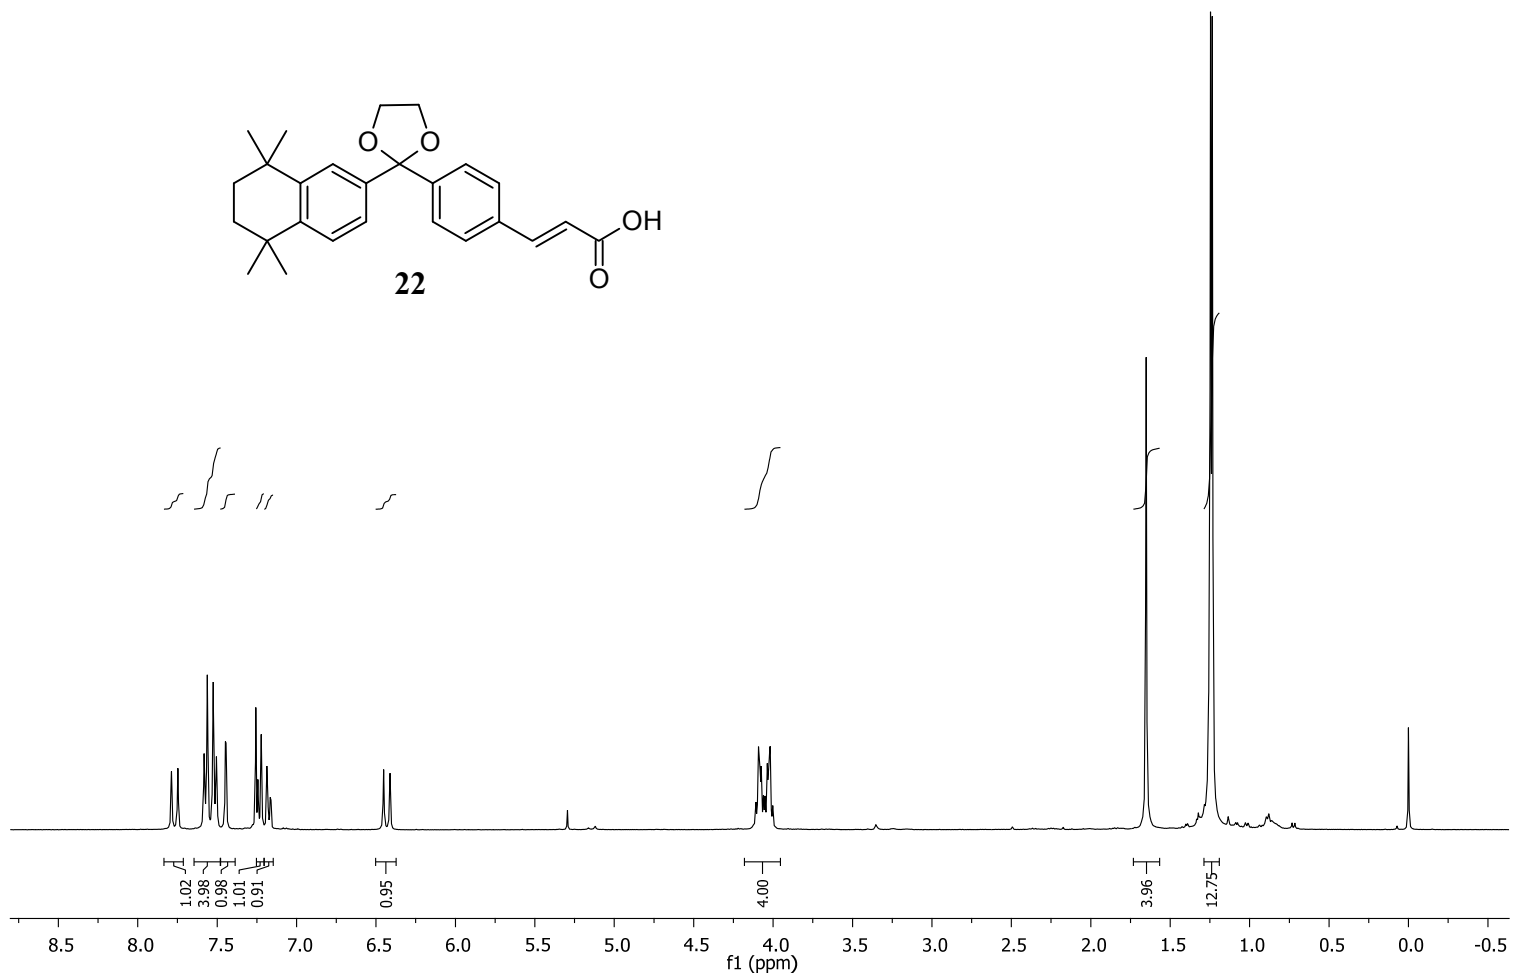

# 100 MHz <sup>13</sup>C-NMR of compound 22 in CDCl<sub>3</sub>

CMK-02-116-C13

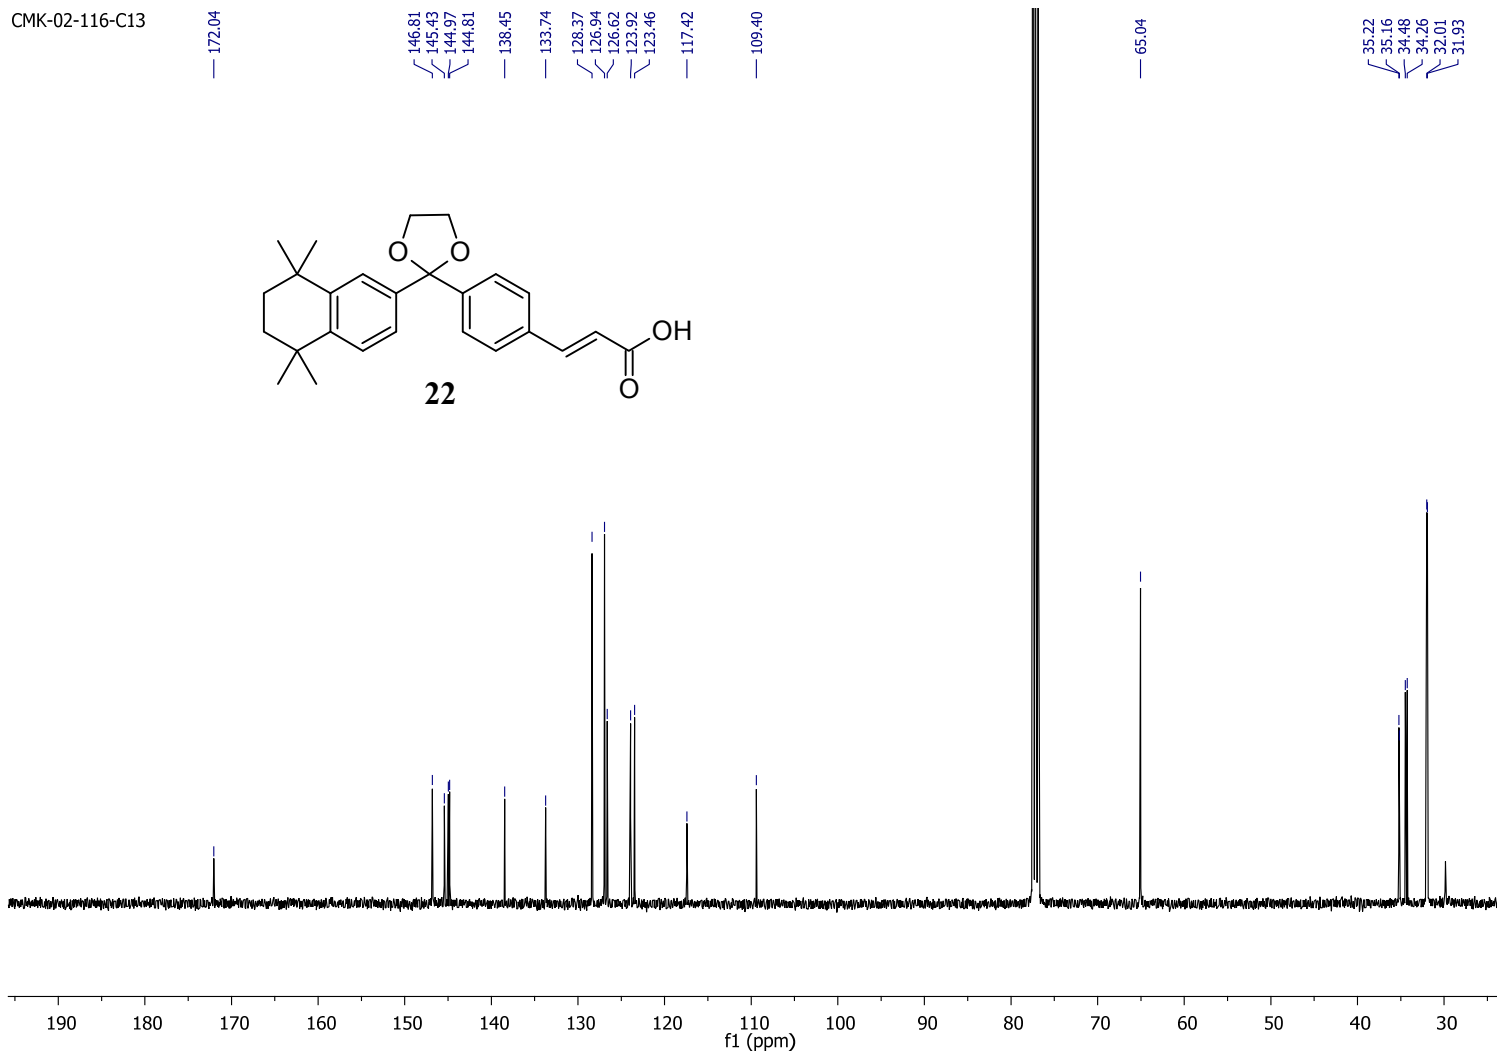

# 400 MHz <sup>1</sup>H-NMR of compound 23 in CDCl<sub>3</sub>

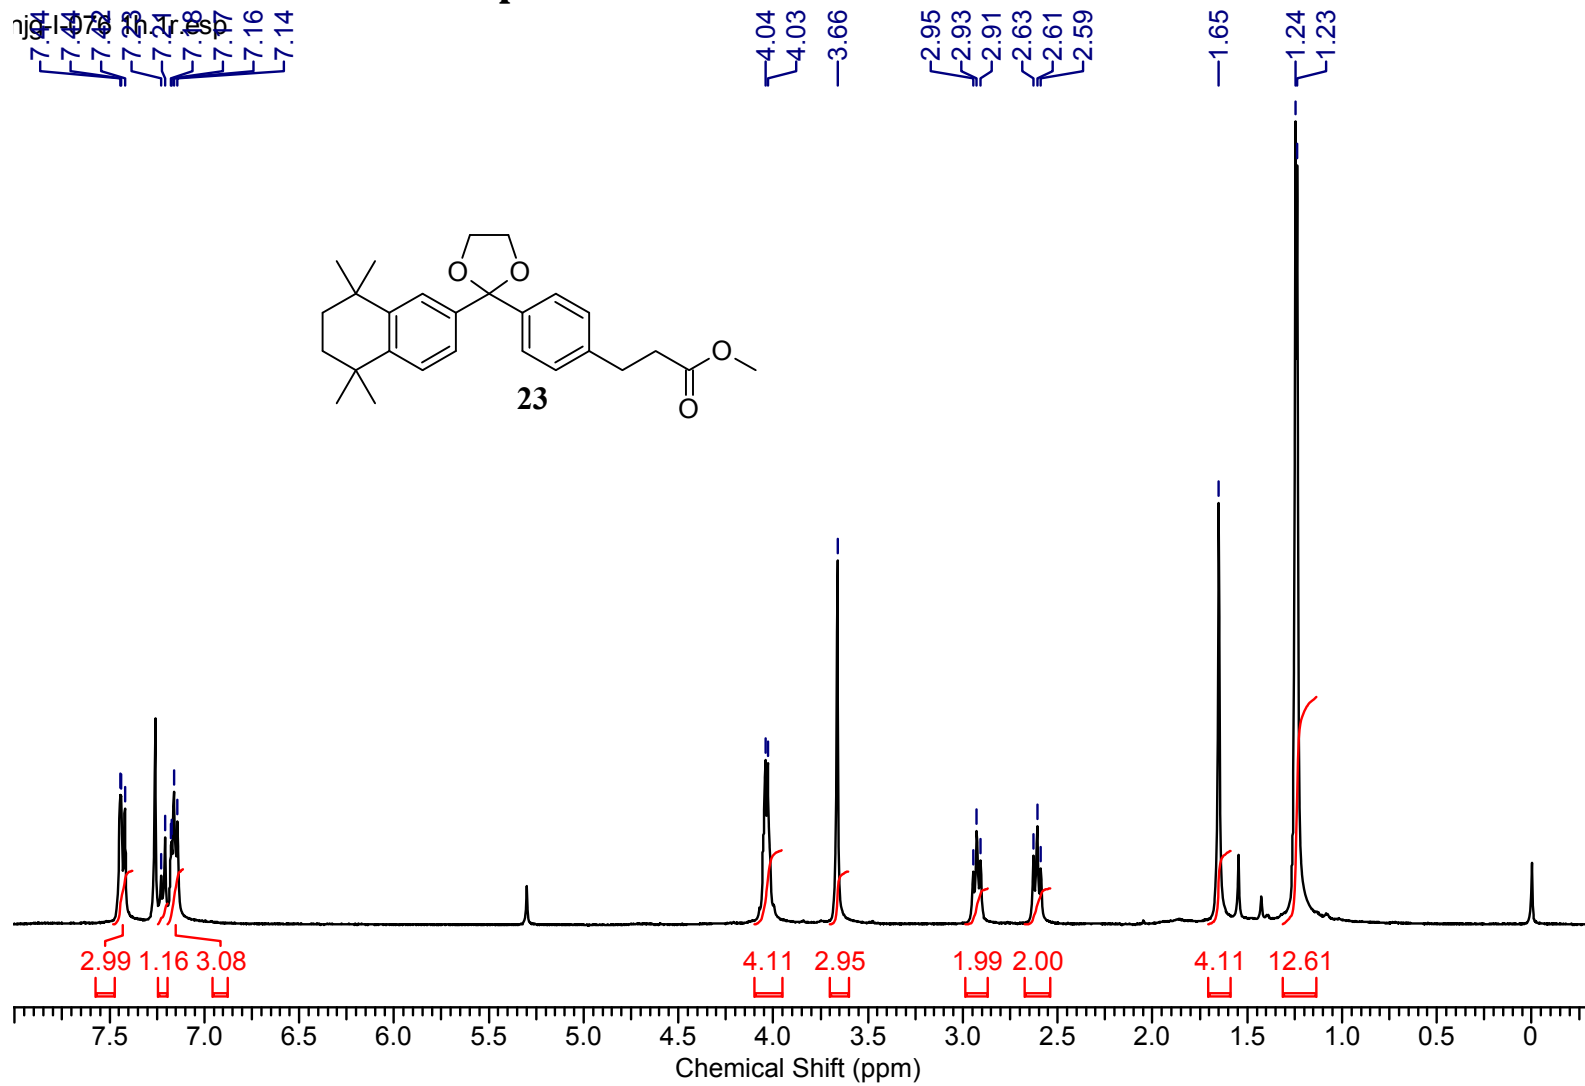

# 100 MHz <sup>13</sup>C-NMR of compound 23 in CDCl<sub>3</sub>

fig-I-076 13c.1r.esp

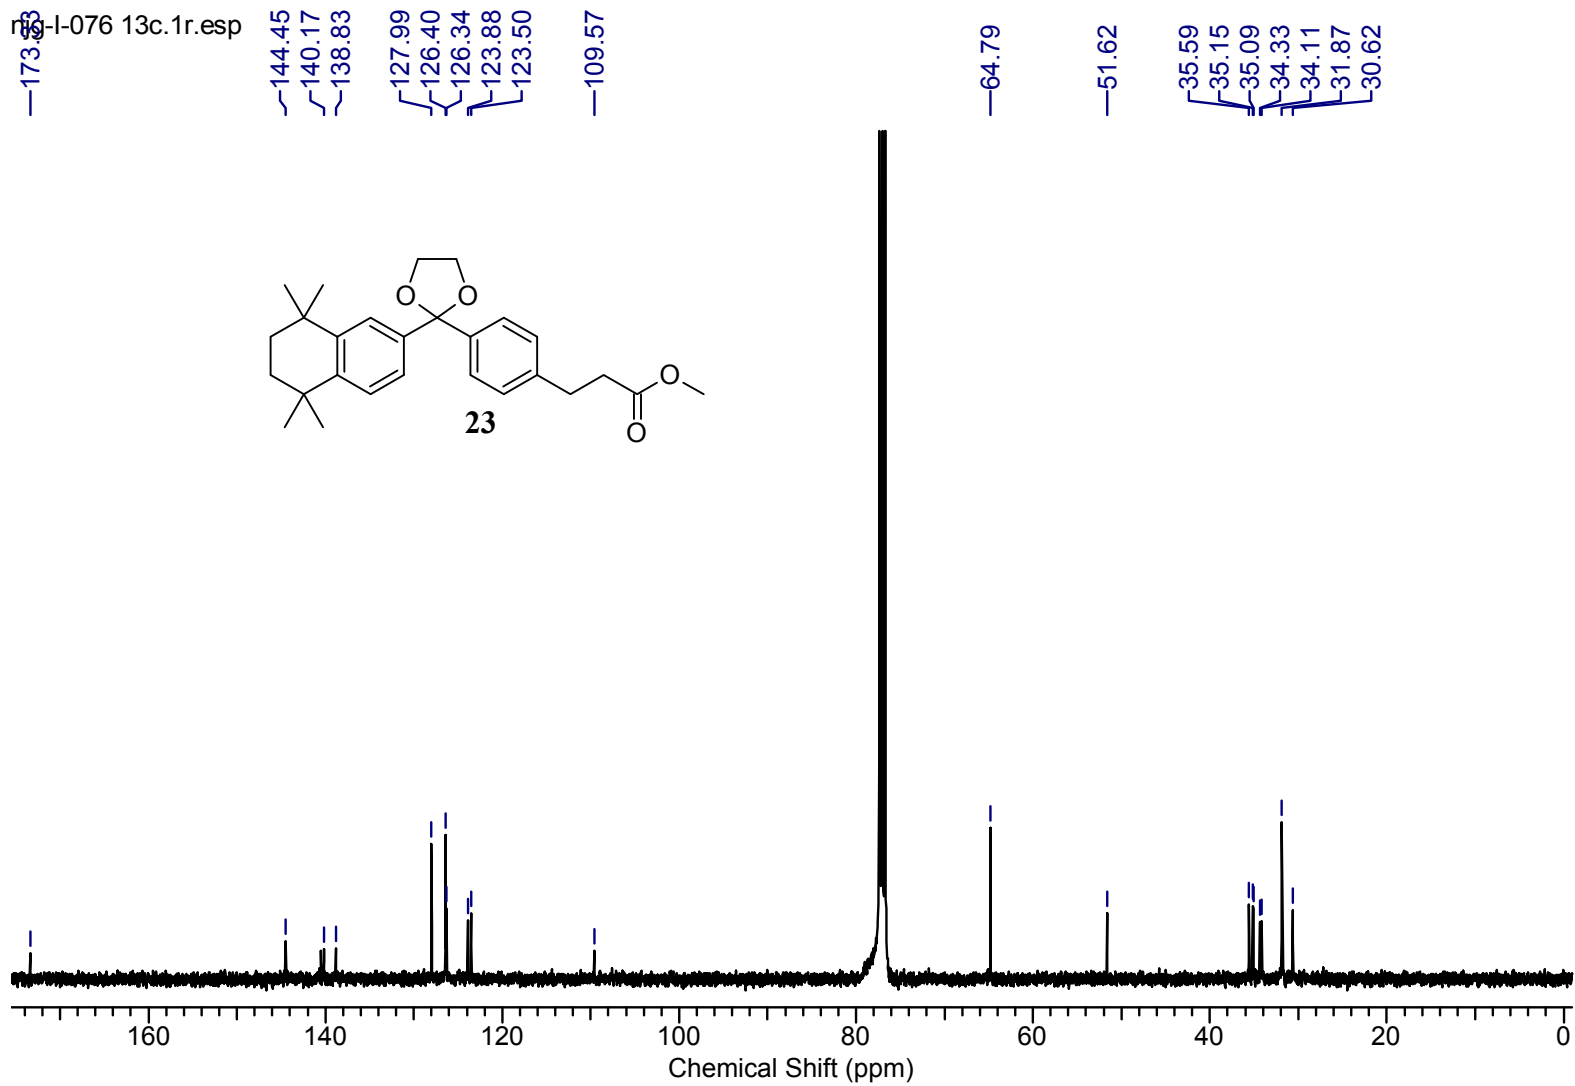

# 400 MHz $^1\text{H}$ -NMR of compound 24 in $\text{CDCl}_3$

CMK-02-119-proton

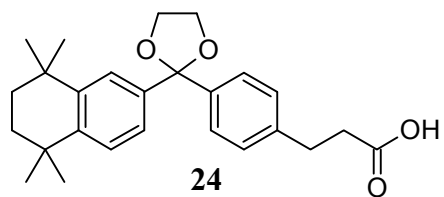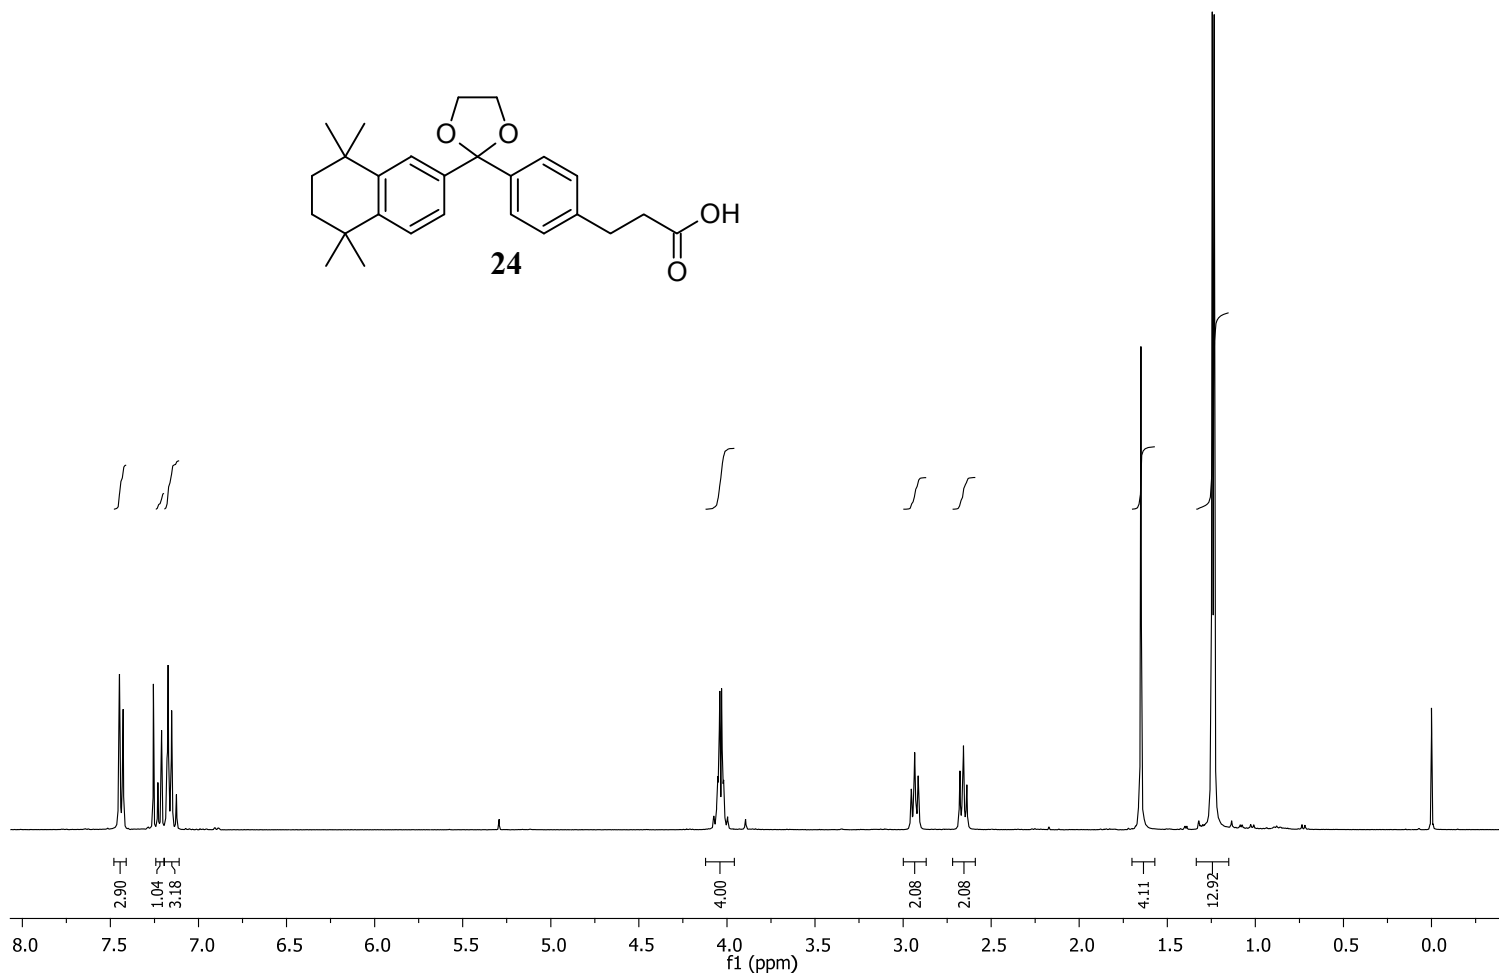



# 100 MHz $^{13}\text{C}$ -NMR of compound 24 in $\text{CDCl}_3$

CMK-02-119-C13

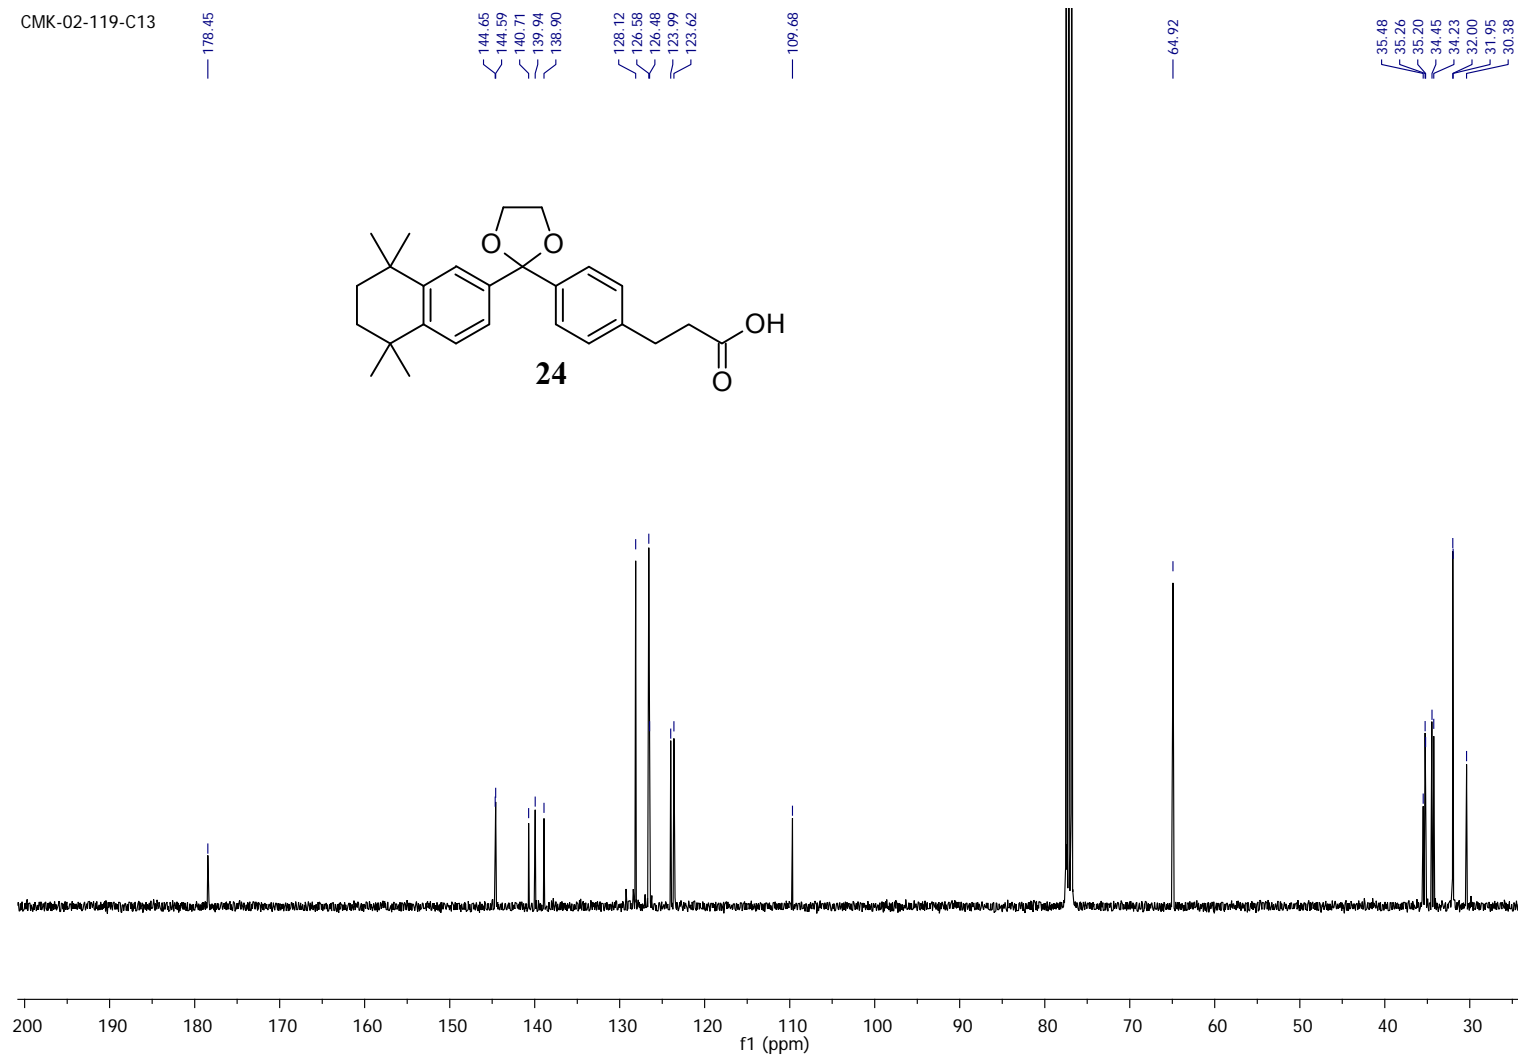

# 400 MHz <sup>1</sup>H-NMR of compound 25 in CDCl<sub>3</sub>

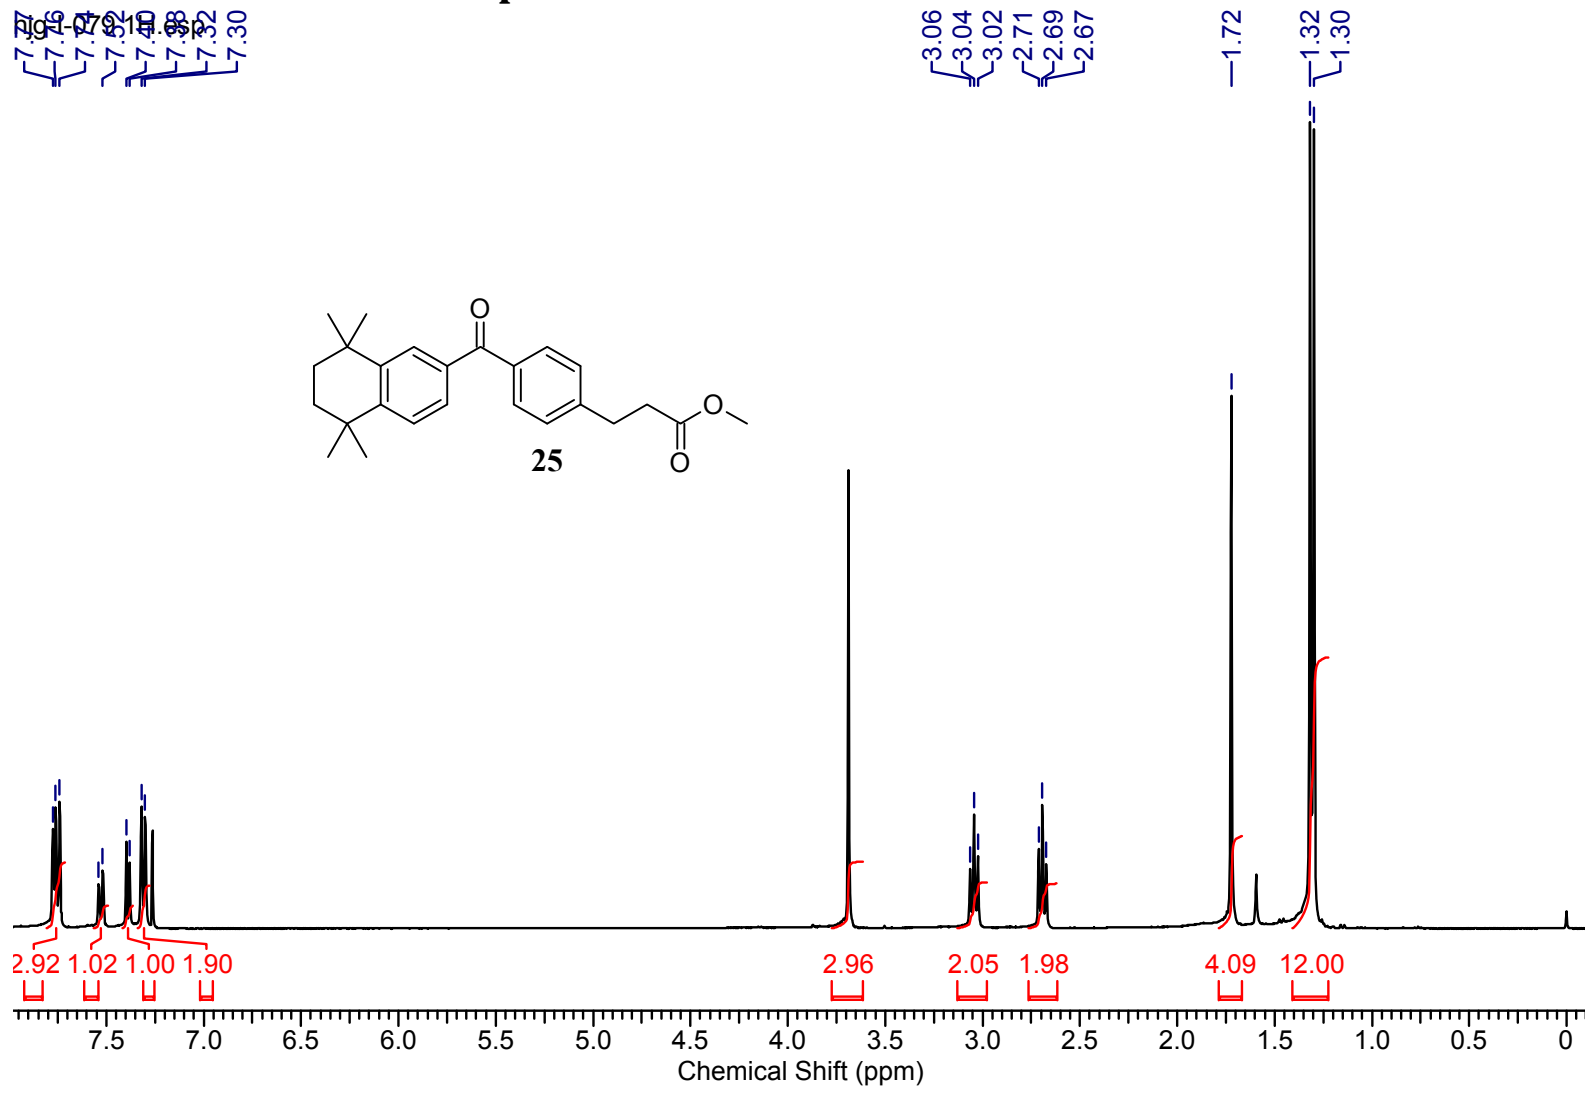

# 100 MHz <sup>13</sup>C-NMR of compound 25 in CDCl<sub>3</sub>

nj1-079 c13.esp

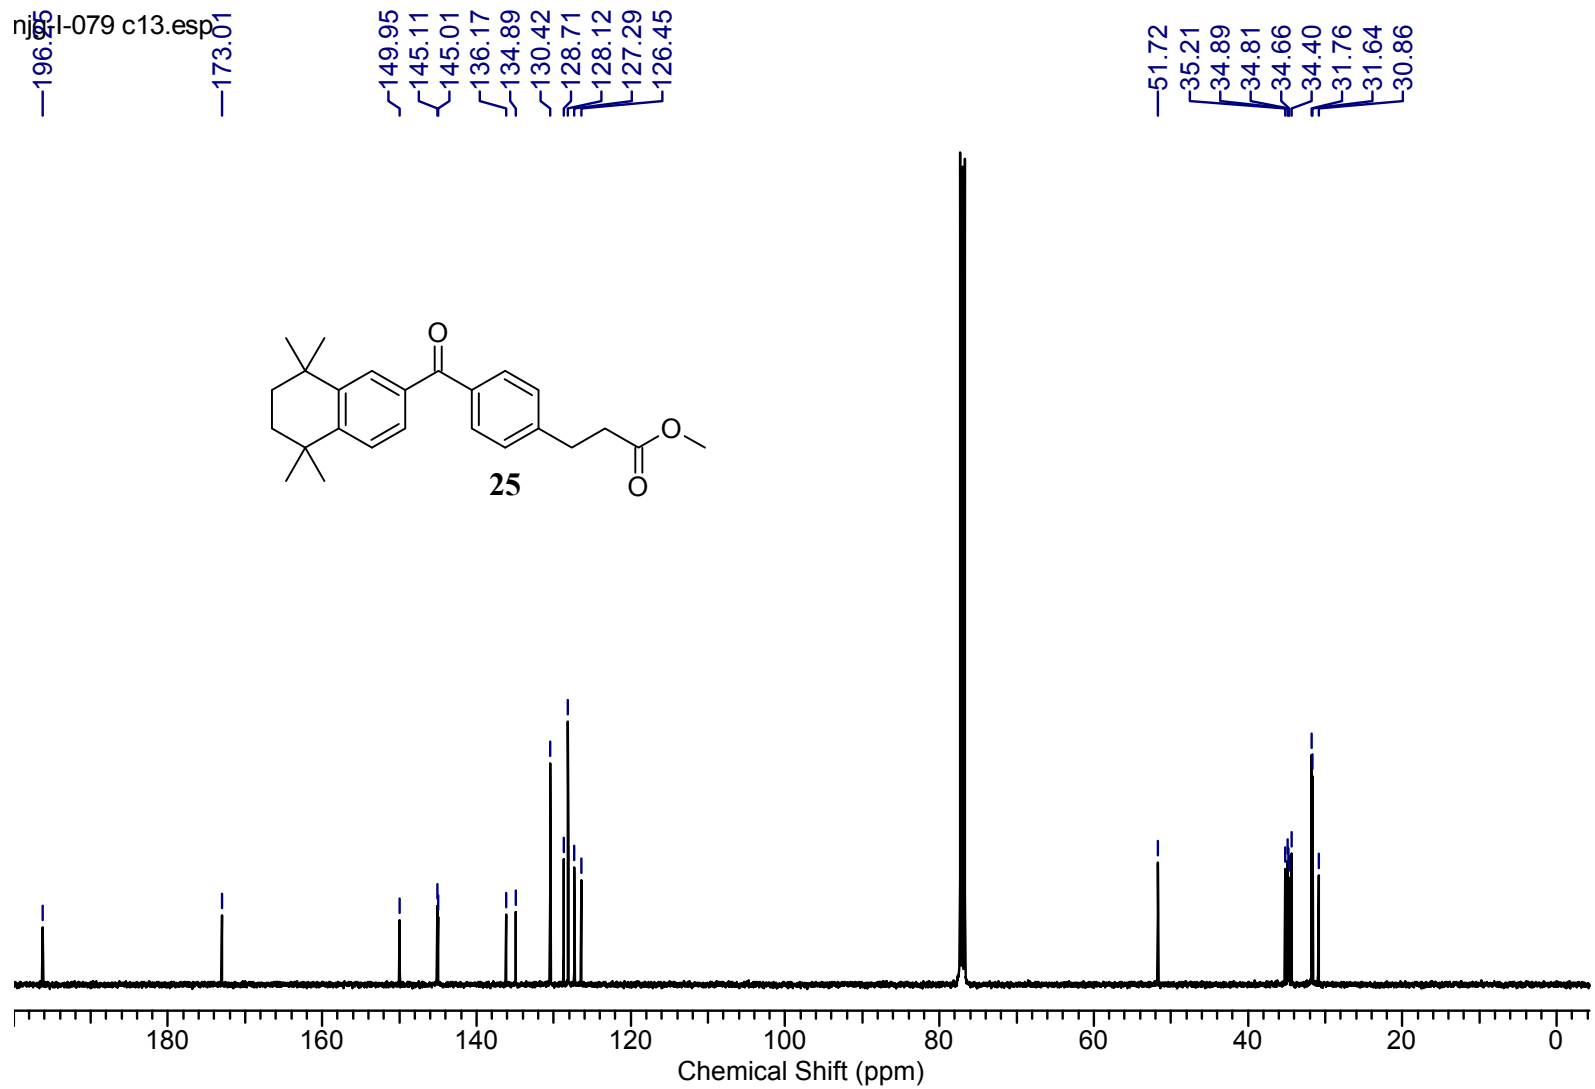

# 400 MHz <sup>1</sup>H-NMR of compound 26 in CDCl<sub>3</sub>

njg-l-081-1071r.esp

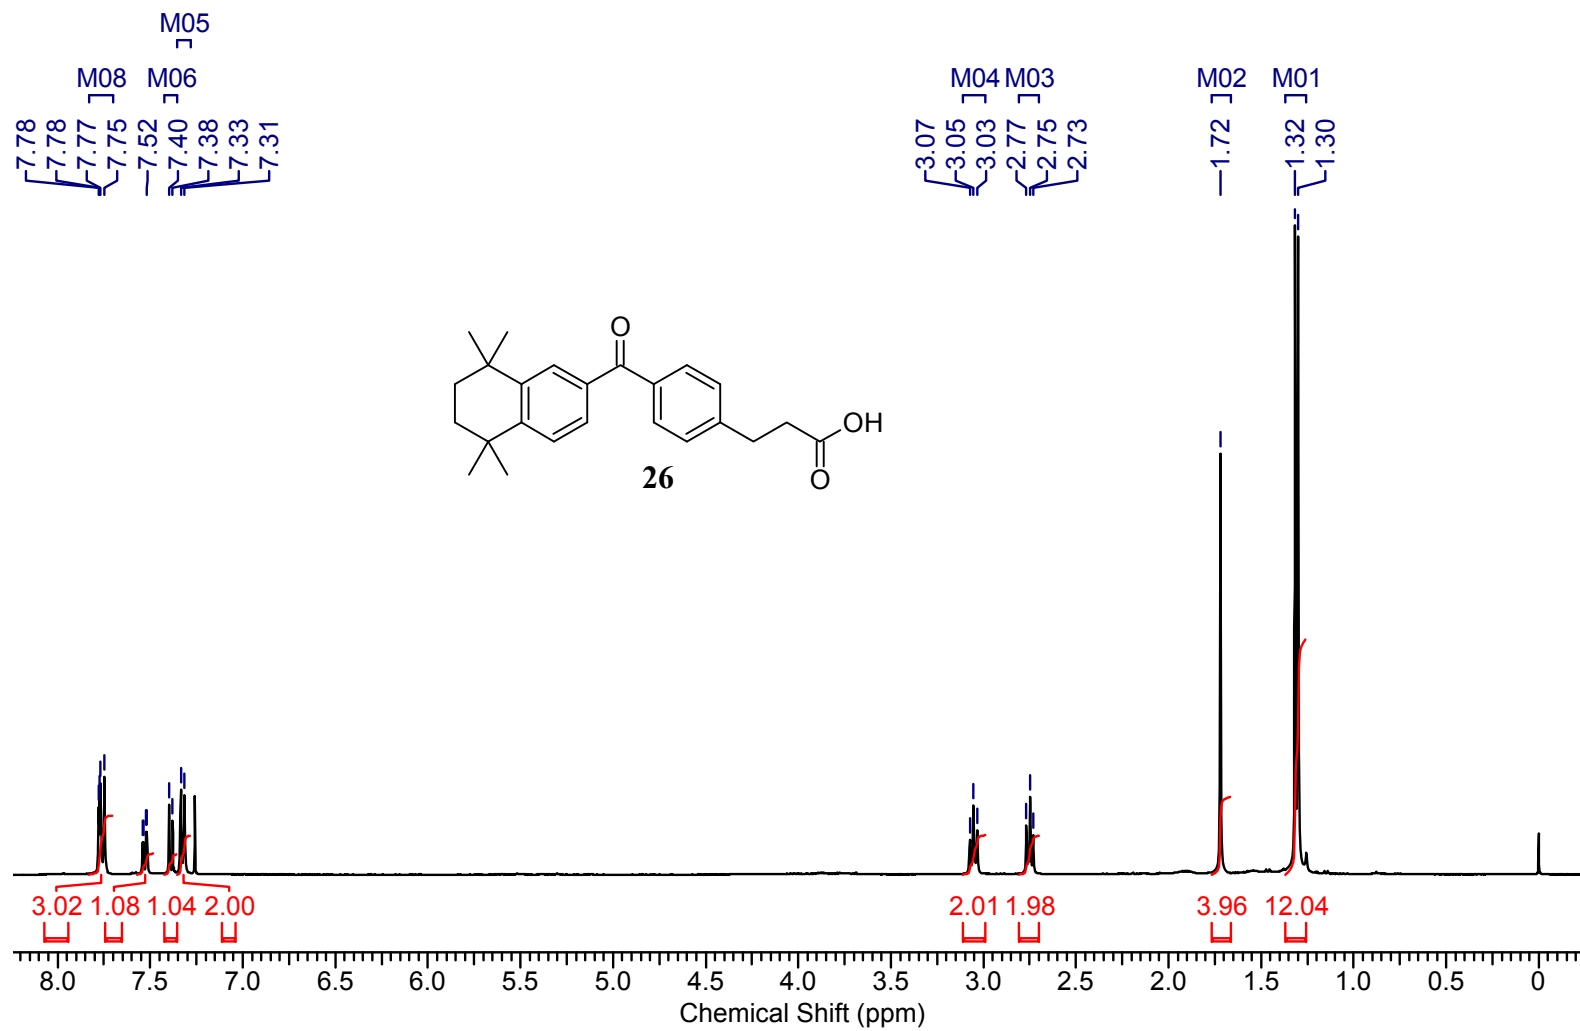

# 100 MHz <sup>13</sup>C-NMR of compound 26 in CDCl<sub>3</sub>

njg-081-13c.esf

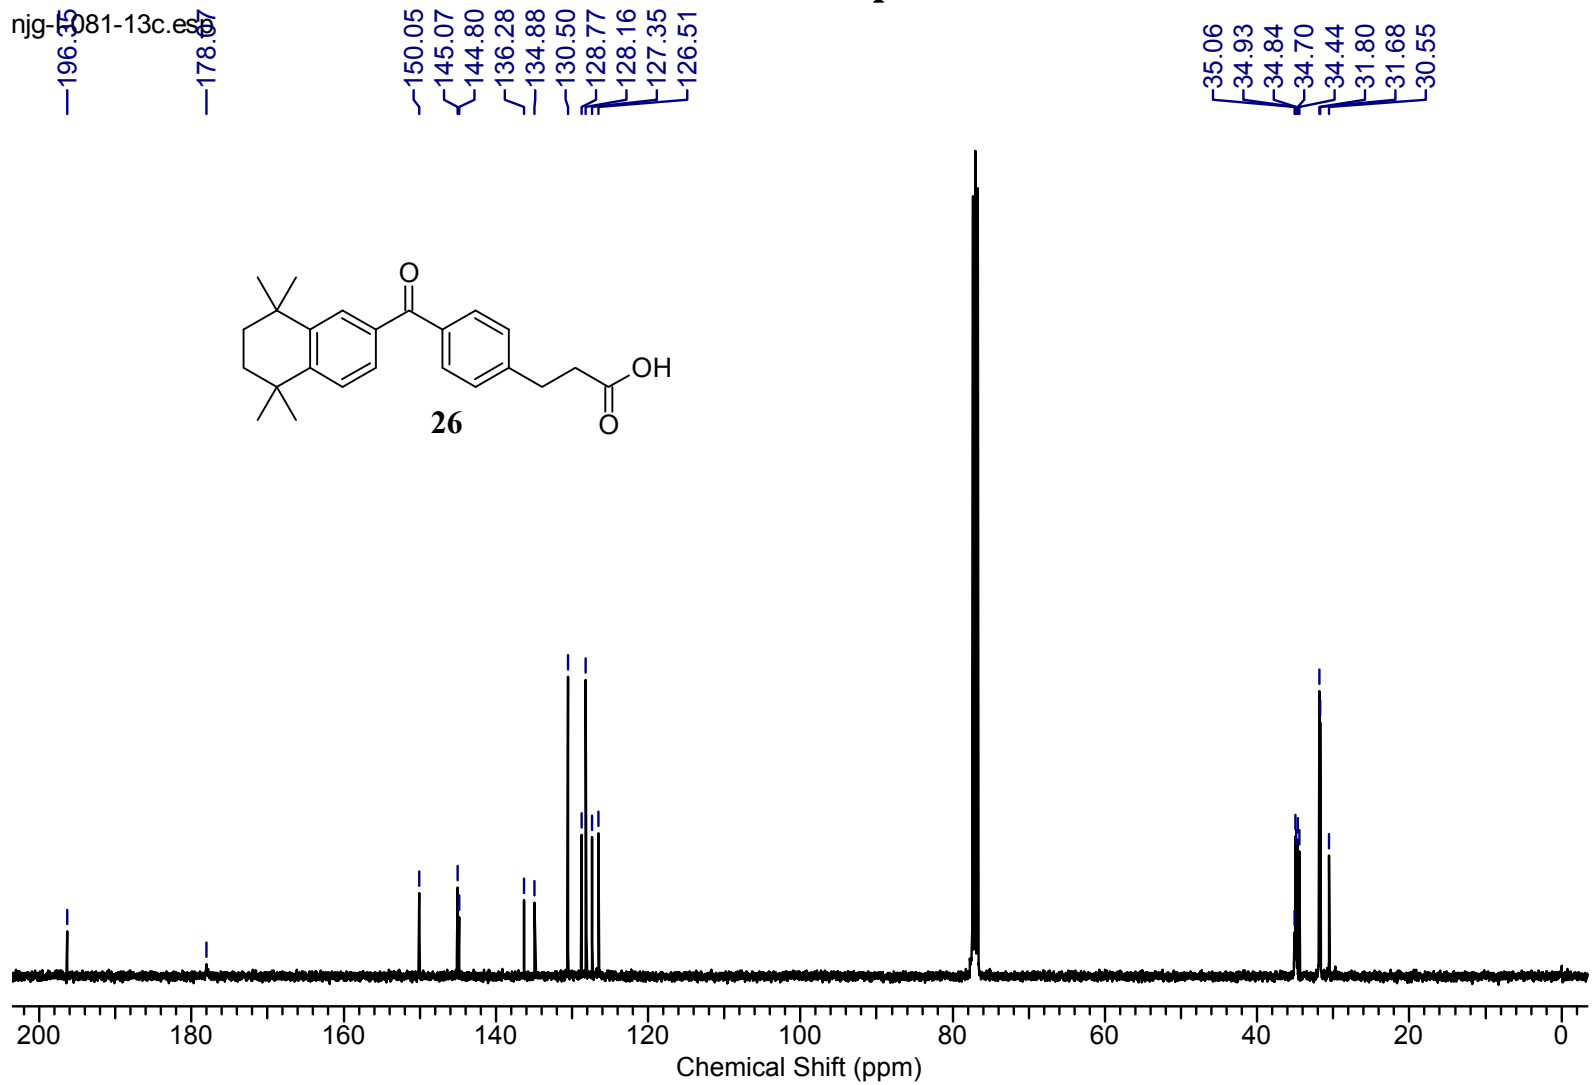

# 400 MHz $^1\text{H}$ -NMR of compound 27 in $\text{CDCl}_3$

CMK-02-107-proton

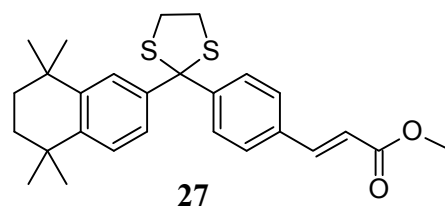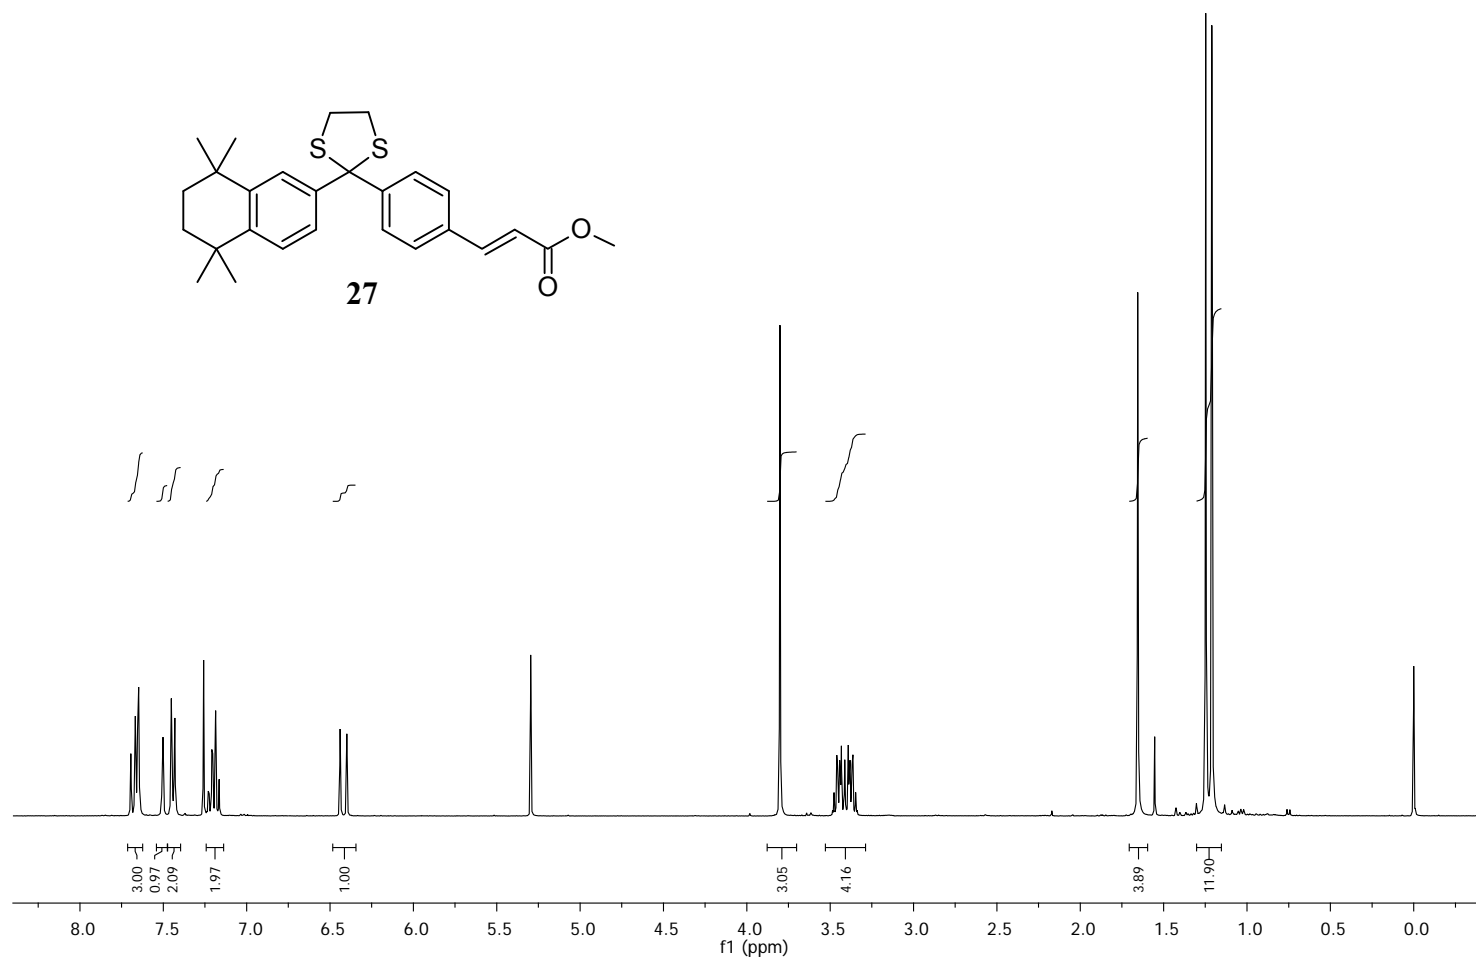

# 100 MHz <sup>13</sup>C-NMR of compound 27 in CDCl<sub>3</sub>

CMK-02-107-C13

167.59

147.72

144.48

144.42

144.11

140.44

133.28

129.03

127.73

126.37

125.58

117.95

51.85

40.37

35.20

35.16

34.51

34.18

31.94

31.88

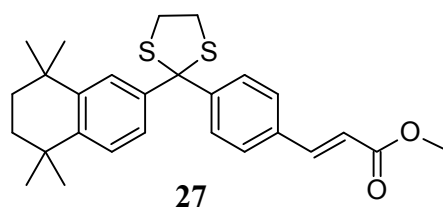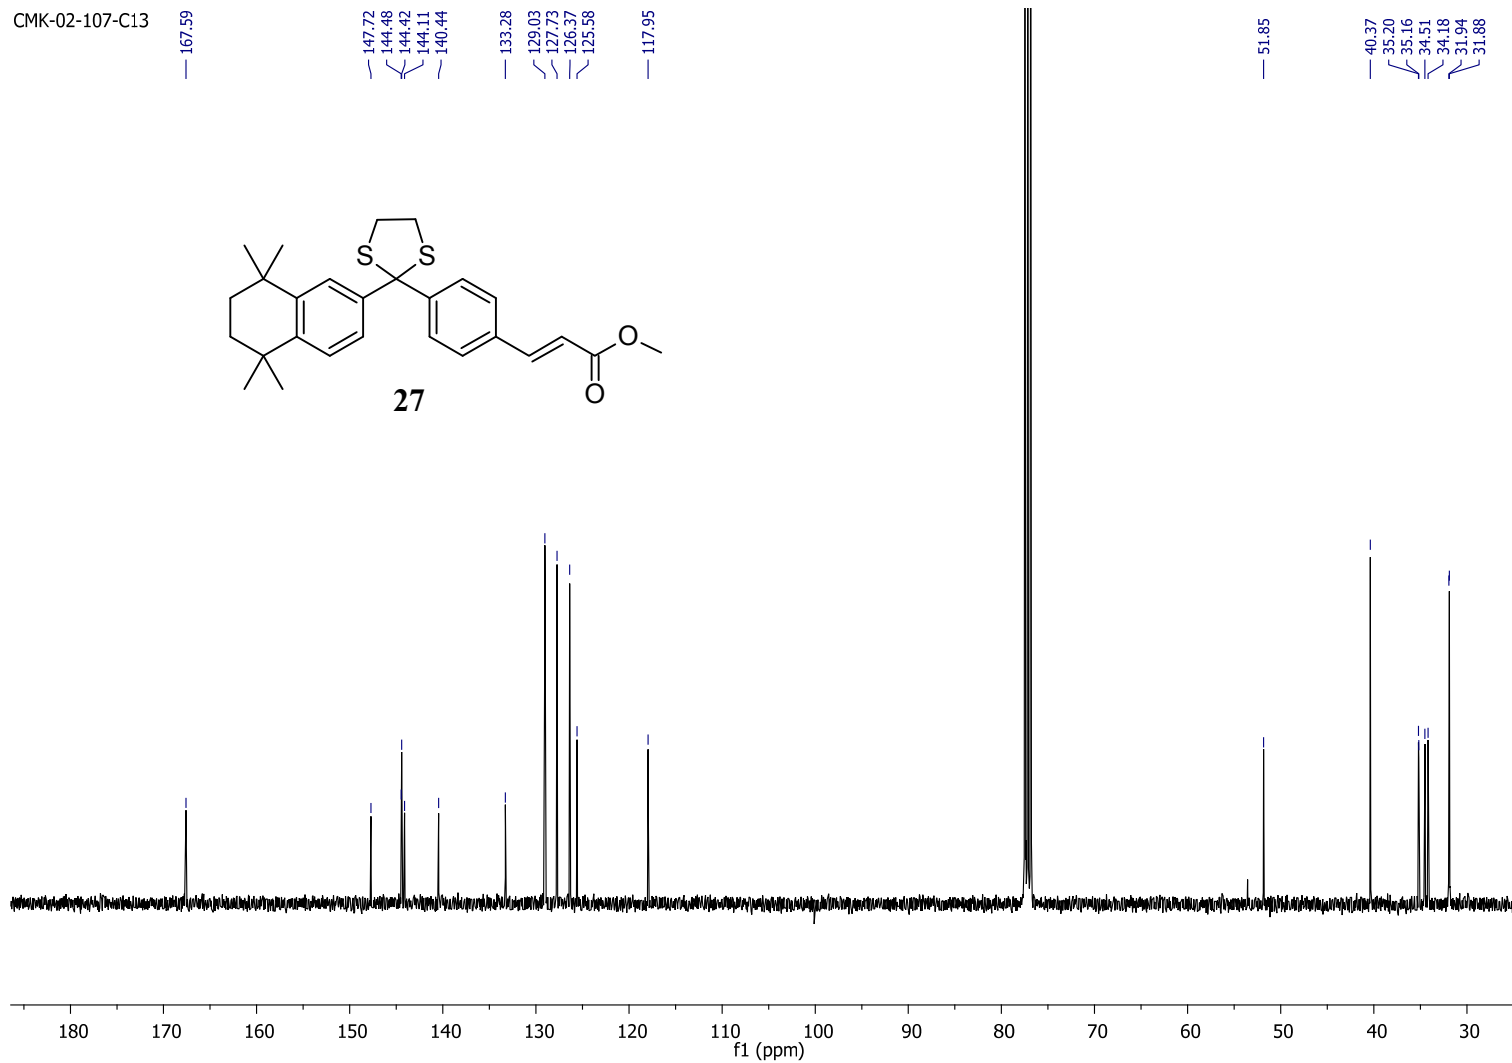

# 400 MHz $^1\text{H-NMR}$ of compound 28 in $\text{CDCl}_3$

CMK-02-108-proton

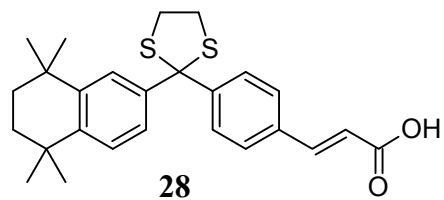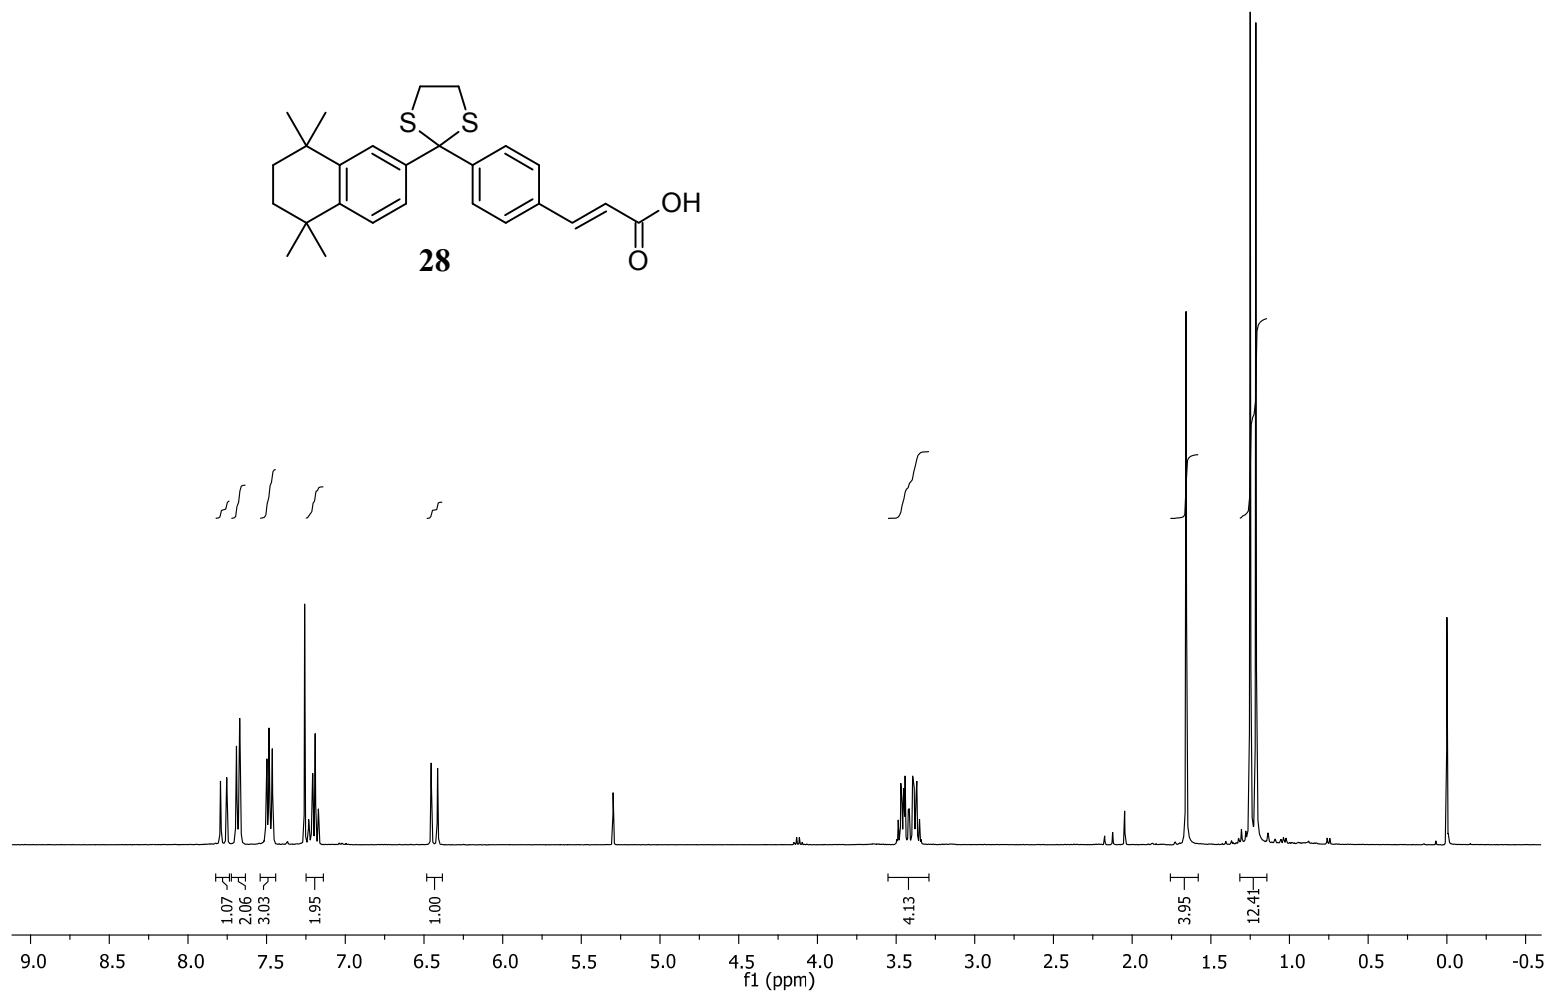



# 100 MHz <sup>13</sup>C-NMR of compound 28 in CDCl<sub>3</sub>

CMK-O2-108-C13

171.89

148.29

146.63

144.52

144.16

140.37

132.92

129.11

128.04

126.40

126.38

125.57

117.27

40.40

35.20

35.16

34.52

34.19

31.95

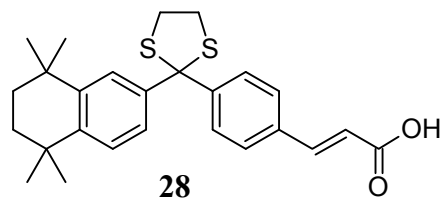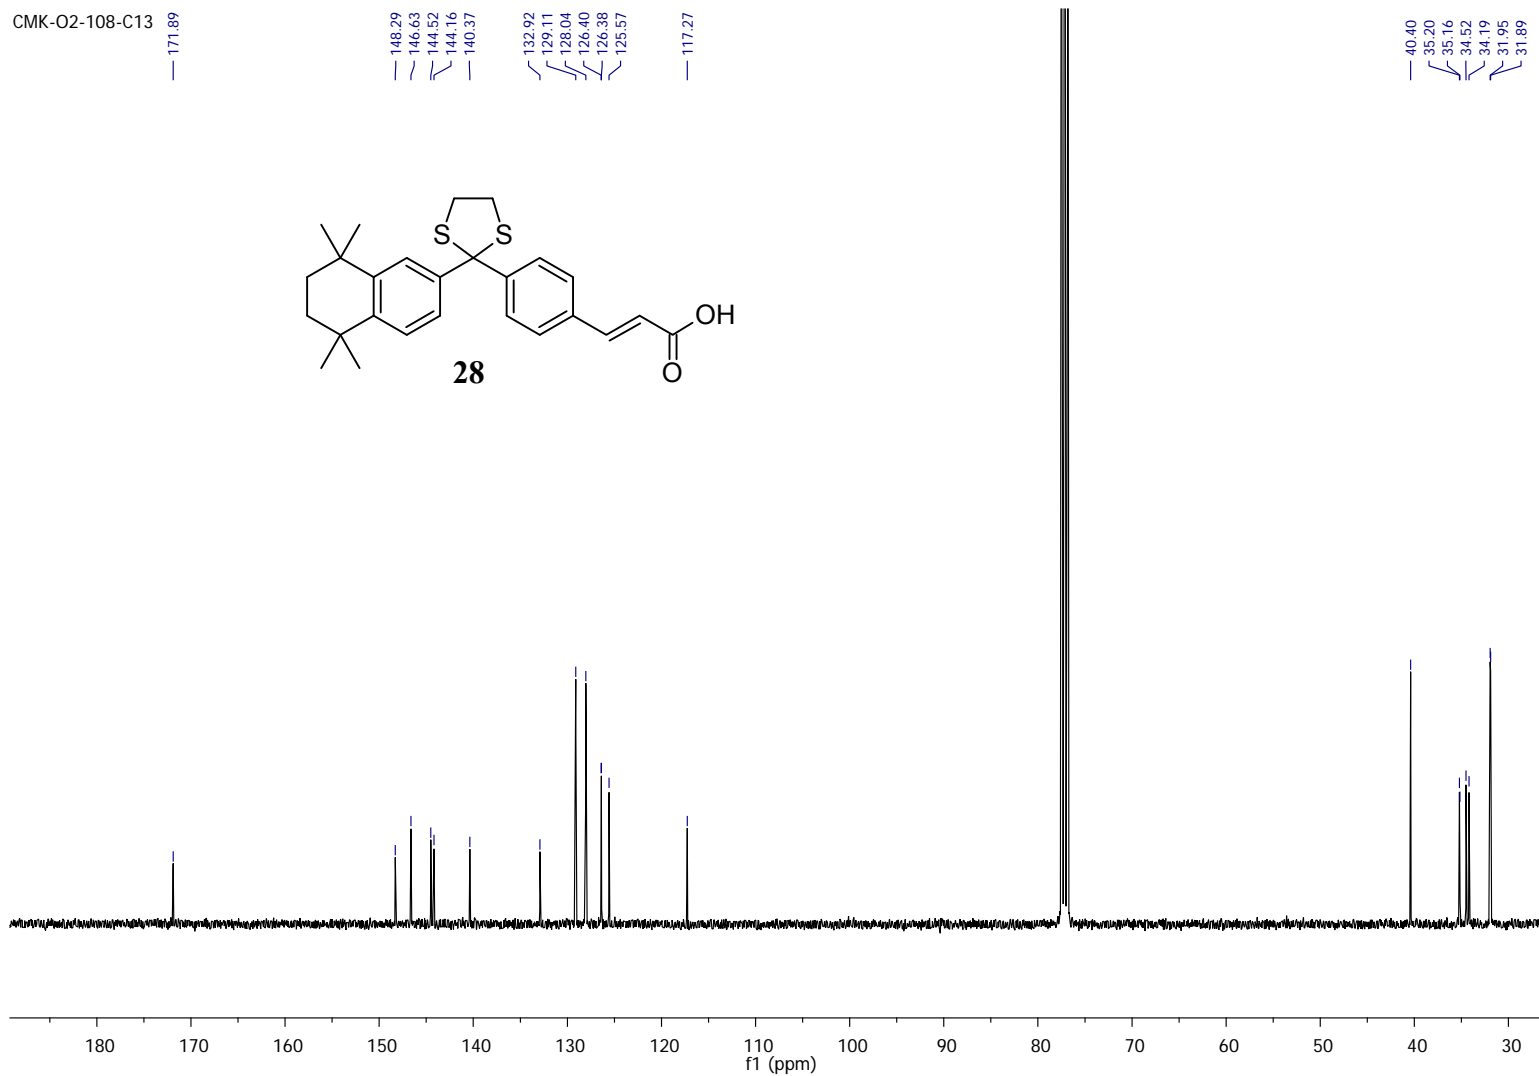

# 400 MHz $^1\text{H-NMR}$ of compound 29 in $\text{CDCl}_3$

CMK-02-120-proton

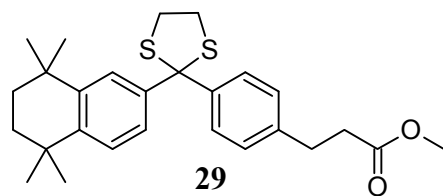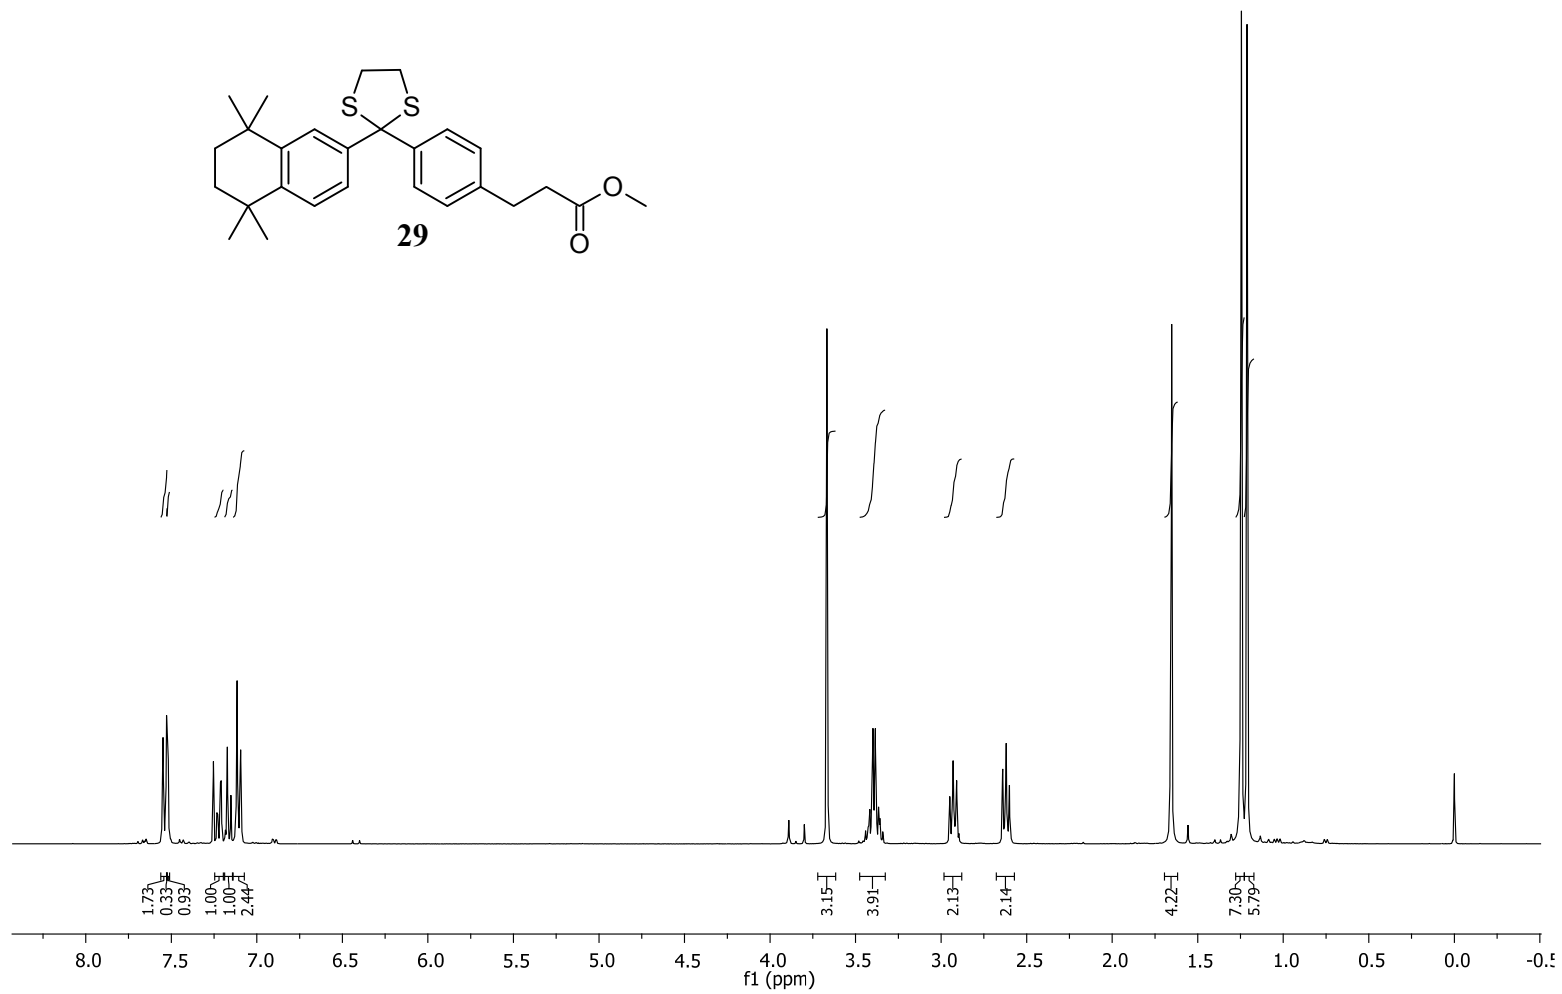

# 100 MHz <sup>13</sup>C-NMR of compound 29 in CDCl<sub>3</sub>

CMK-02-120-C13

173.47

144.19  
143.77  
142.99  
141.05  
139.45

128.64  
127.82  
126.41  
126.20  
125.68

77.48  
77.16  
76.84

51.76

40.19

35.63  
35.23  
34.47  
31.92  
31.89  
30.54

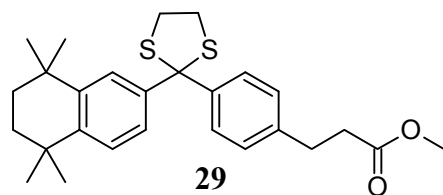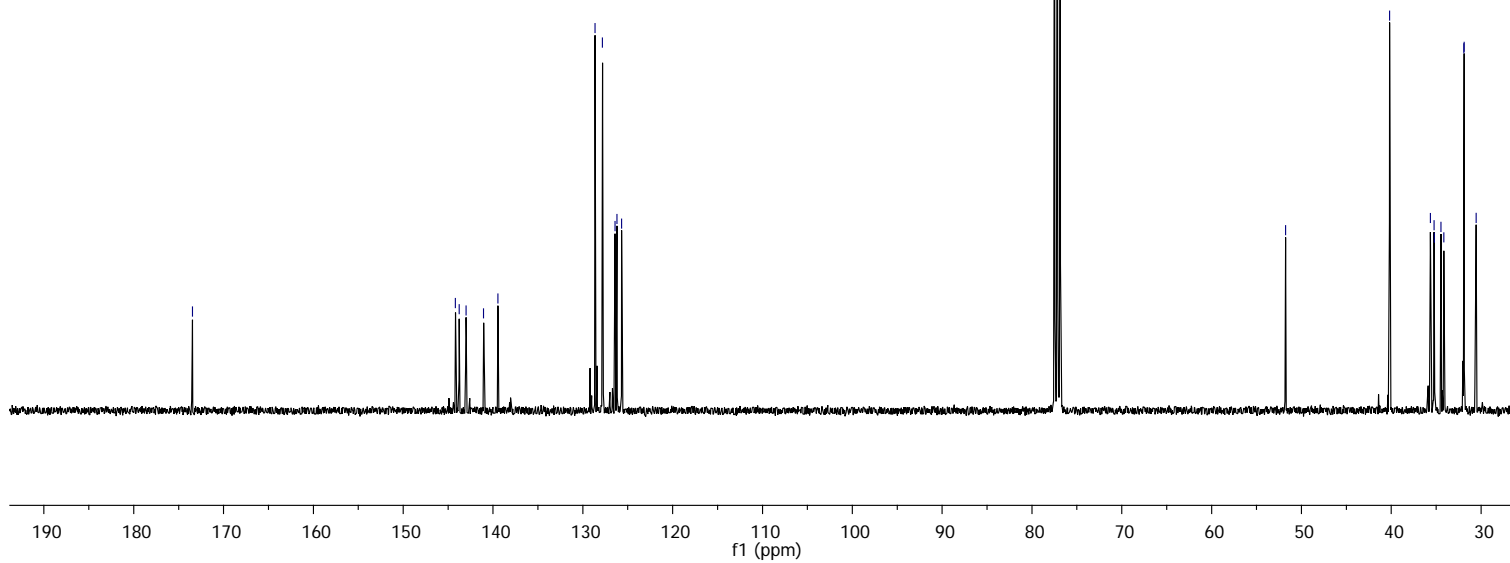

# 400 MHz $^1\text{H-NMR}$ of compound 30 in $\text{CDCl}_3$

CMK-02-124B-proton

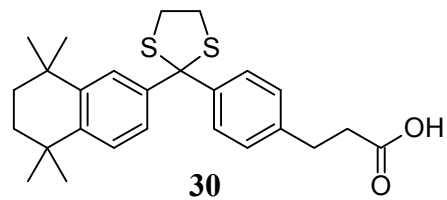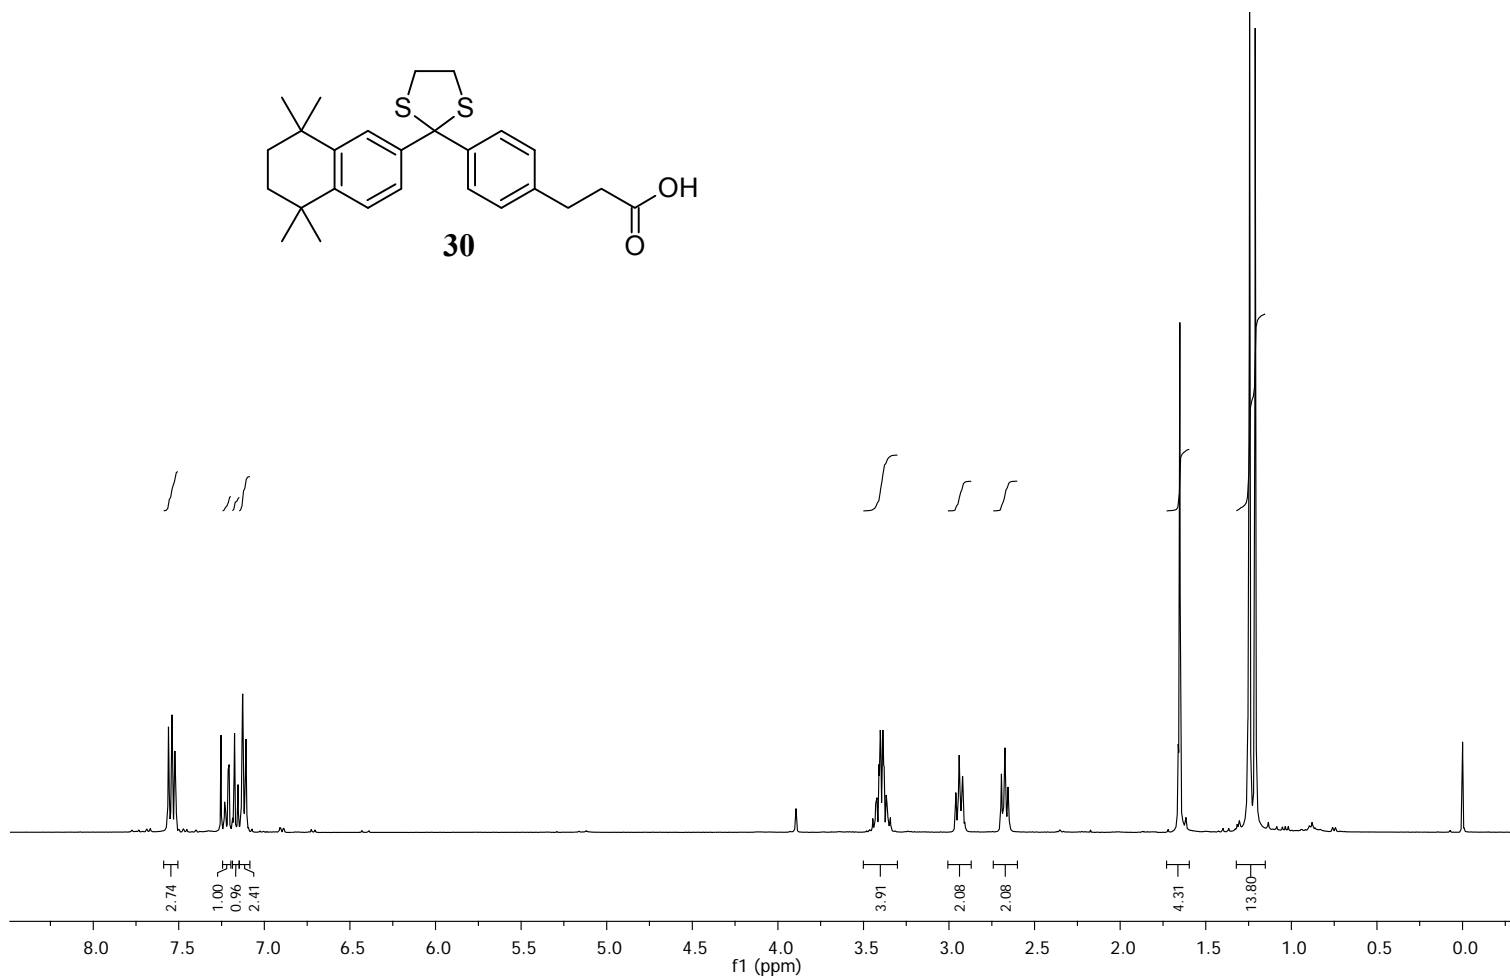

# 100 MHz <sup>13</sup>C-NMR of compound 30 in CDCl<sub>3</sub>

CMK-02-124B-C13

178.79

144.21  
143.80  
143.15  
141.01  
139.10  
128.71  
127.81  
126.43  
126.22  
125.69

77.48  
77.16  
77.00  
76.84

40.20  
35.24  
35.20  
34.48  
34.15  
31.93  
31.89

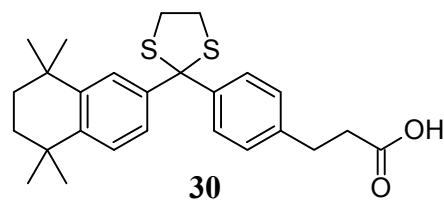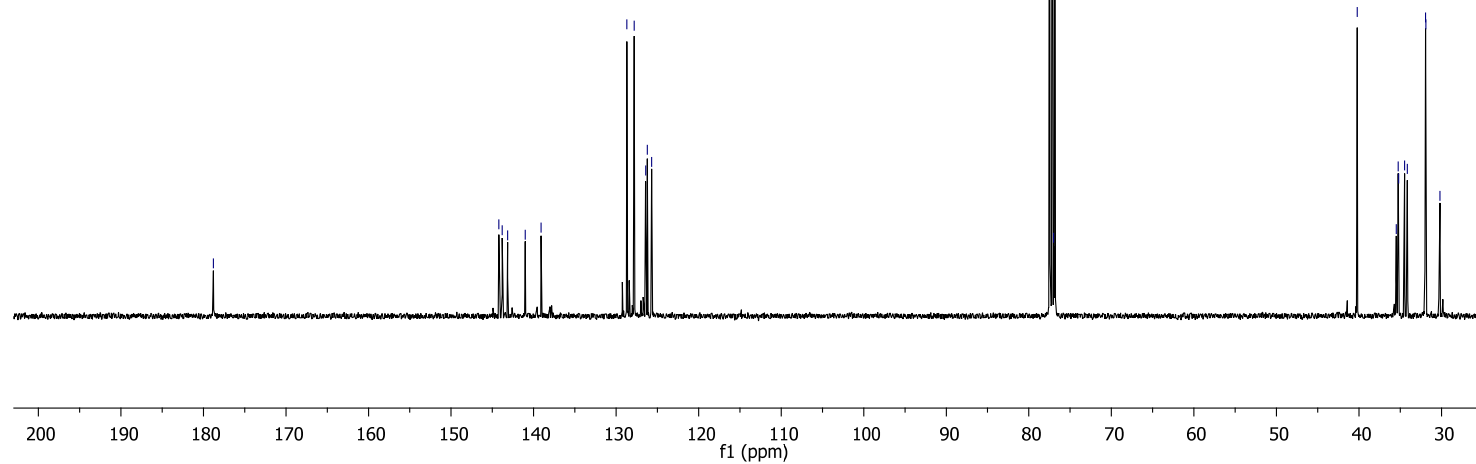

# 400 MHz <sup>1</sup>H-NMR of compound 31 in CDCl<sub>3</sub>

njg-M05-1 1h.esp

M05  
M04  
M05  
7.41  
7.40  
7.27  
7.27  
7.24  
7.22

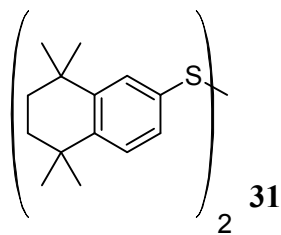

M02  
M06  
M01  
1.65  
1.53  
1.24  
1.21

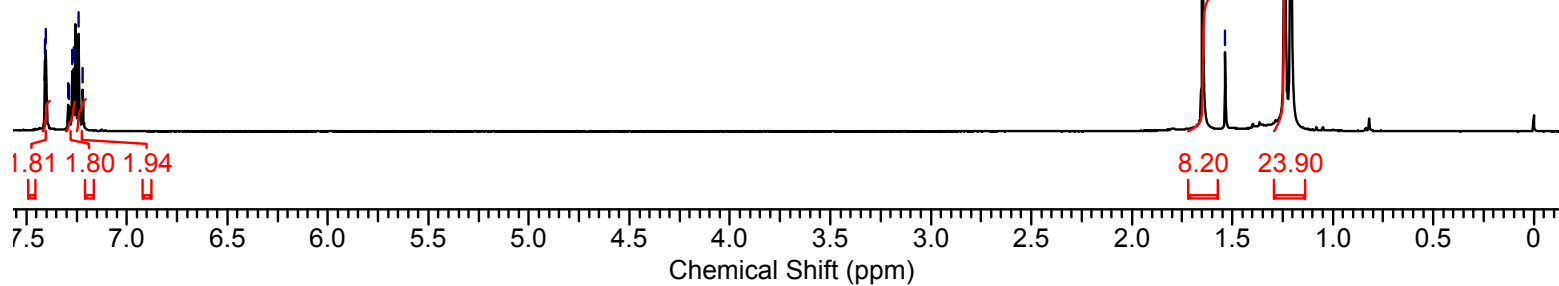

# 100 MHz $^{13}\text{C}$ -NMR of compound 31 in $\text{CDCl}_3$

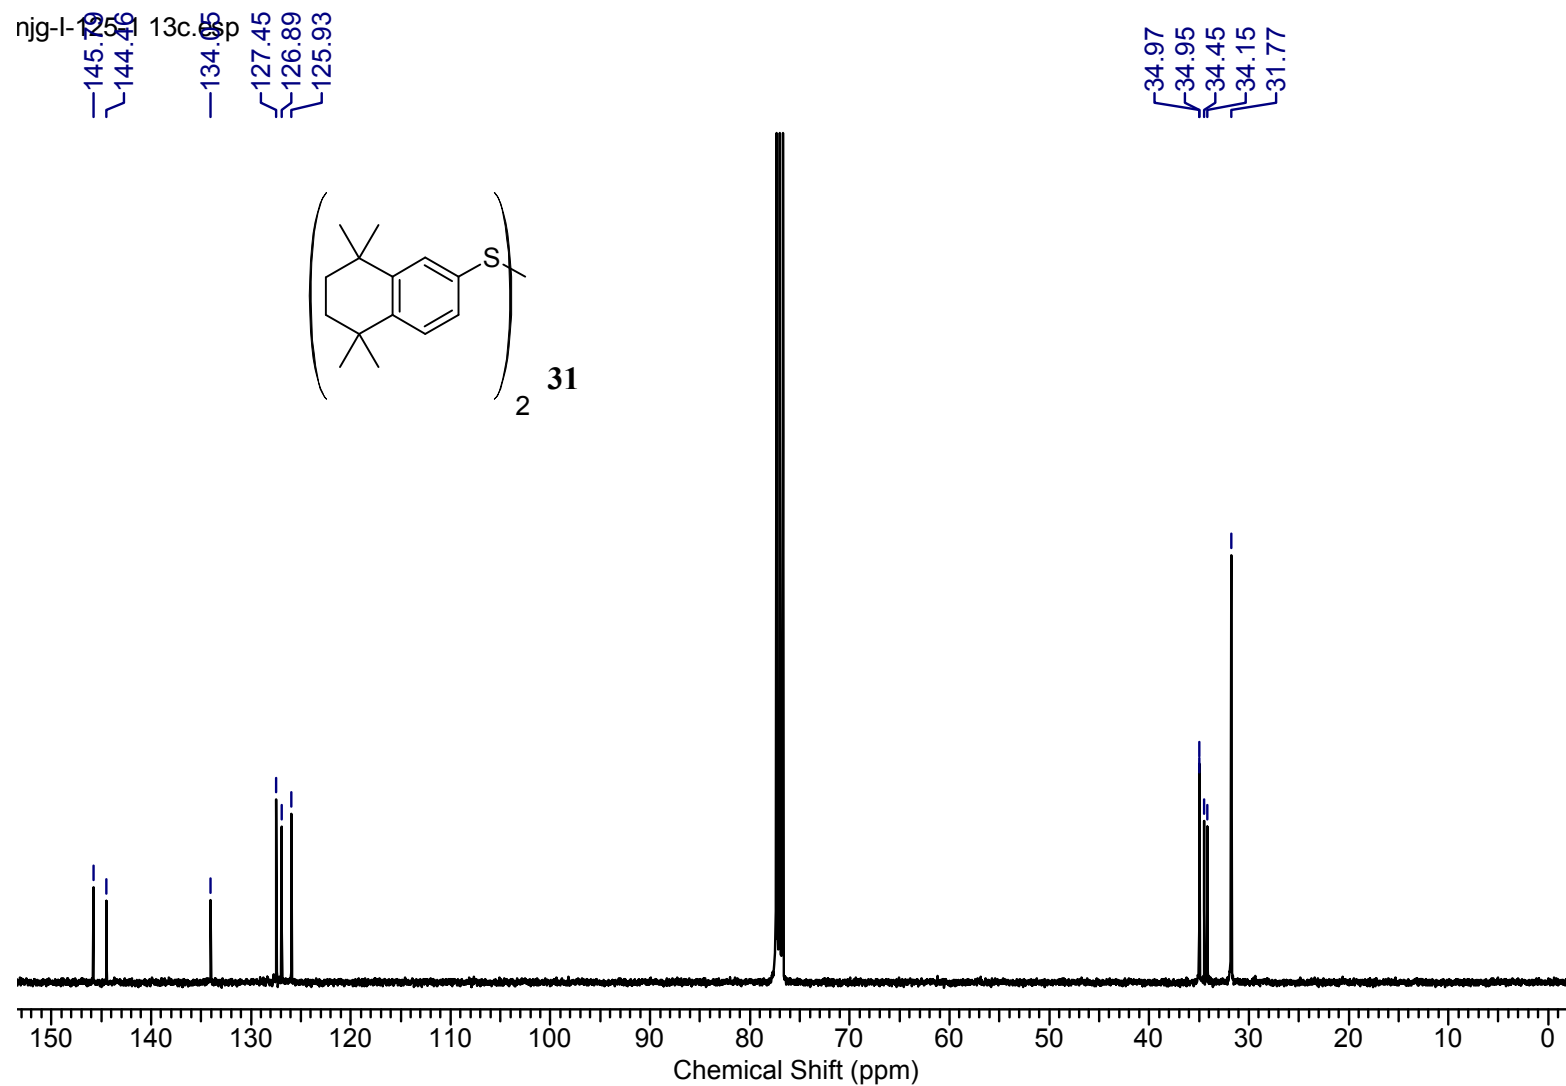

# 400 MHz <sup>1</sup>H-NMR of compound 32 in CDCl<sub>3</sub>

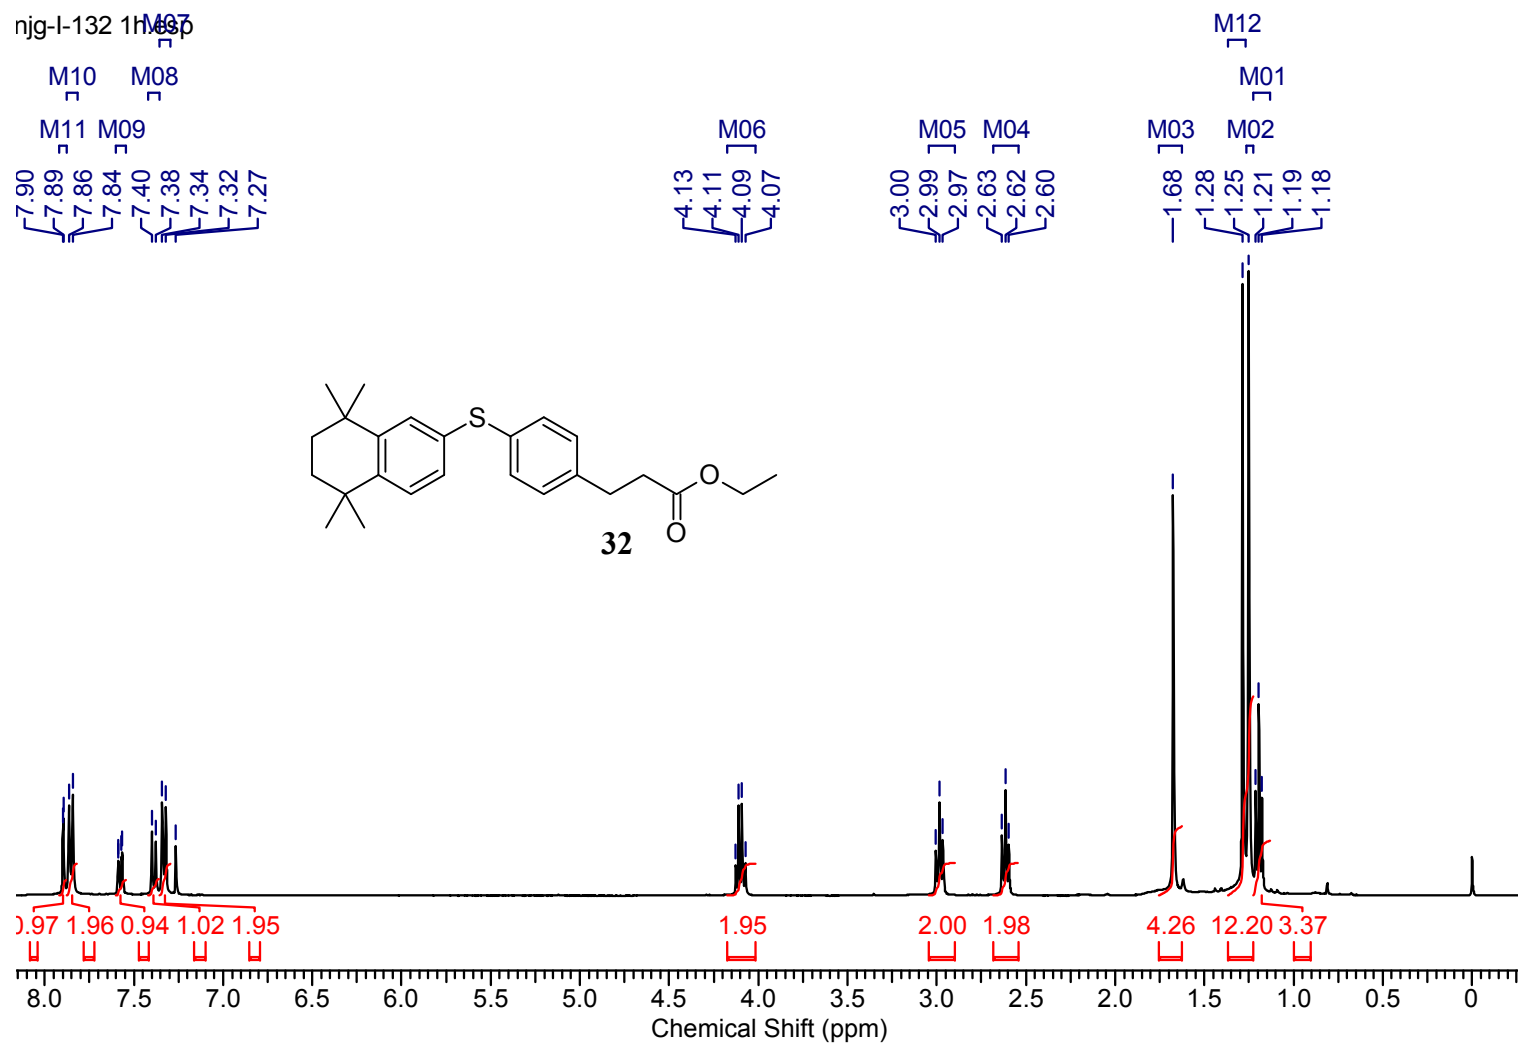



# 100 MHz <sup>13</sup>C-NMR of compound 32 in CDCl<sub>3</sub>

njg-l-32 13c.esp

172.28

150.80

146.45

146.21

140.05

138.55

129.18

127.81

127.77

125.89

124.49

60.63

35.14

34.66

34.61

34.55

31.70

31.57

30.68

14.15

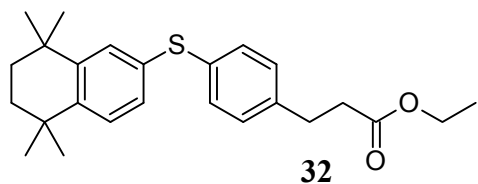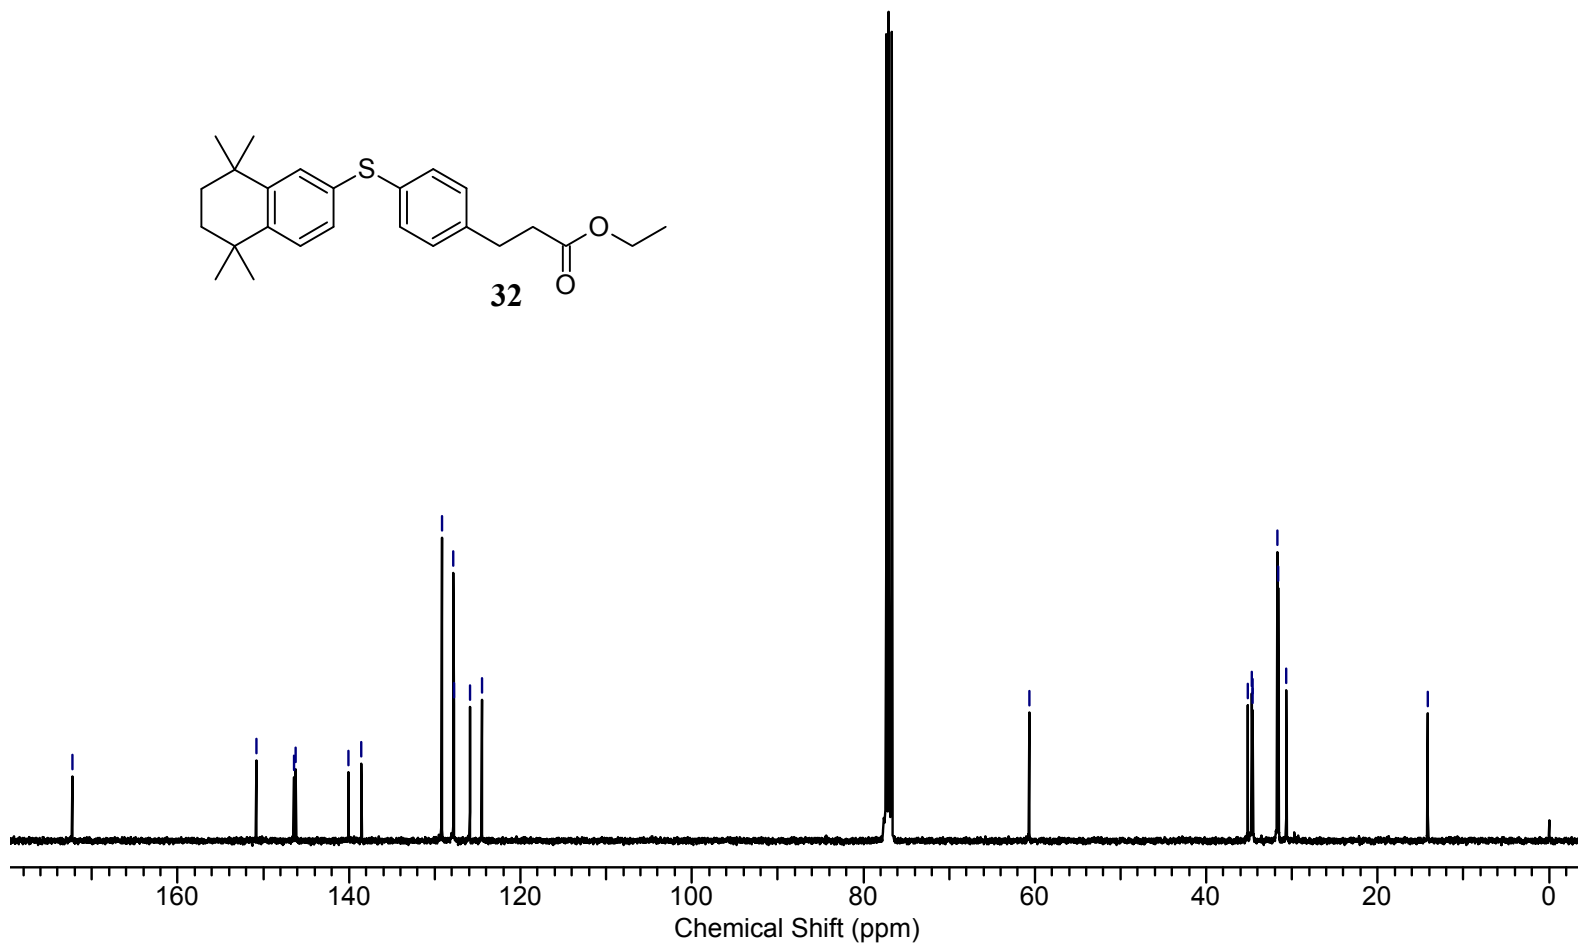

# 400 MHz <sup>1</sup>H-NMR of compound 34 in CDCl<sub>3</sub>

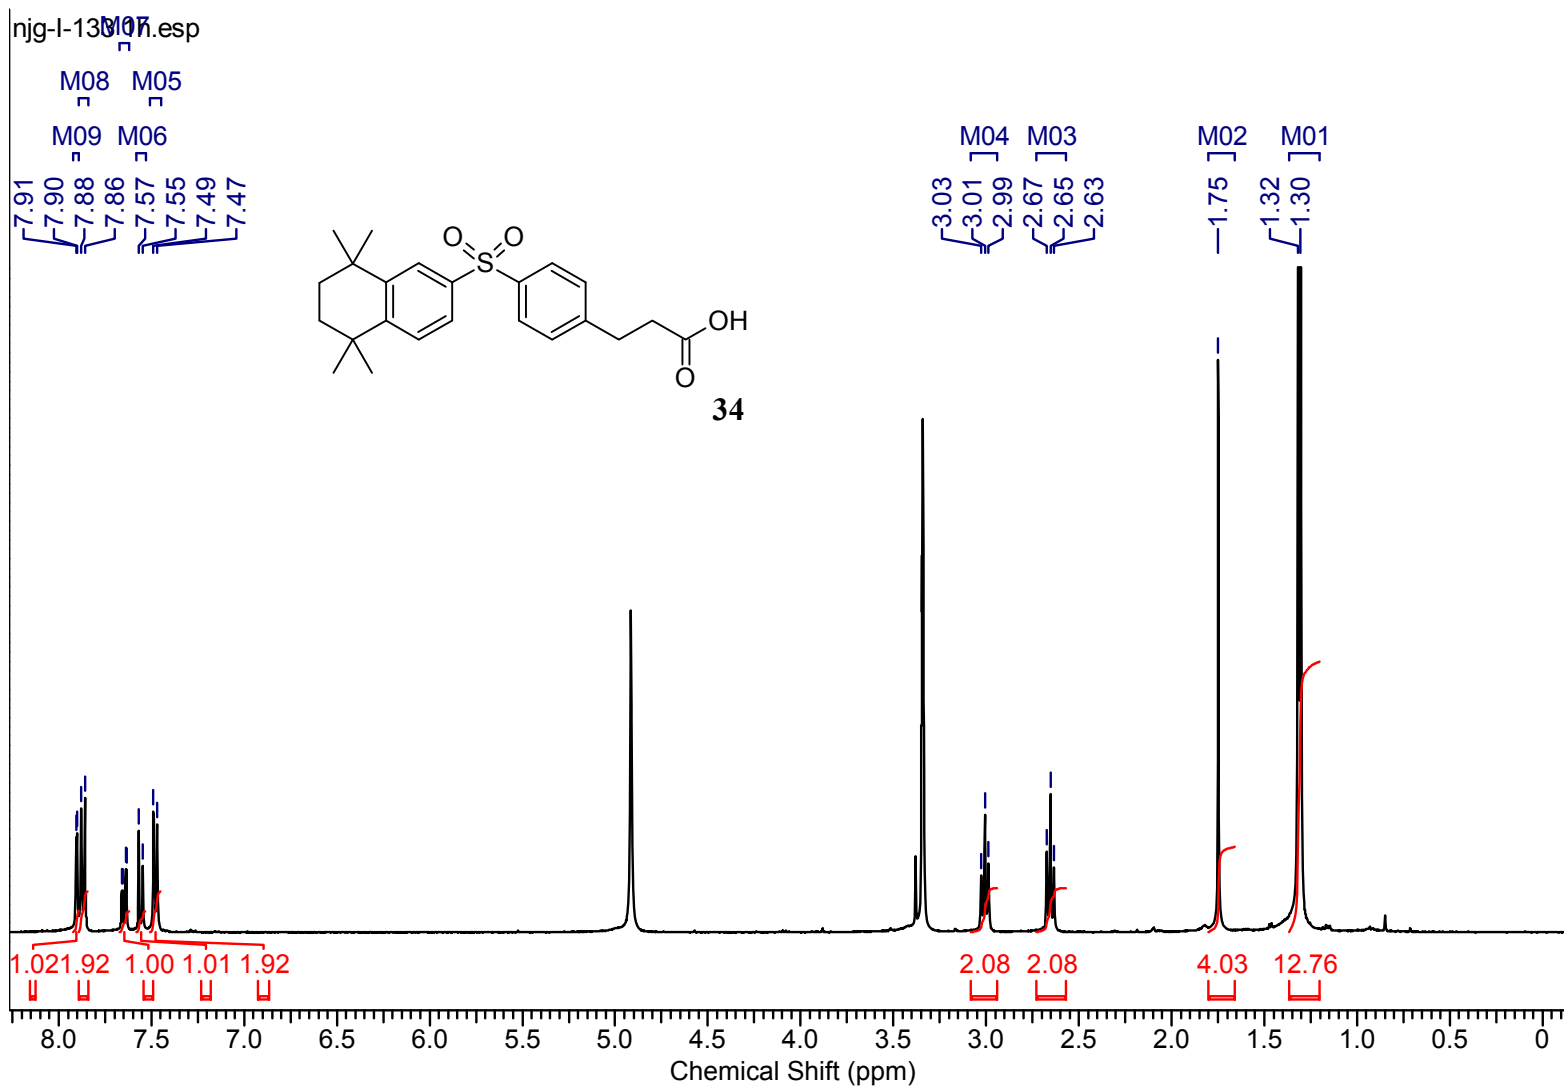

# 100 MHz <sup>13</sup>C-NMR of compound 34 in CDCl<sub>3</sub>

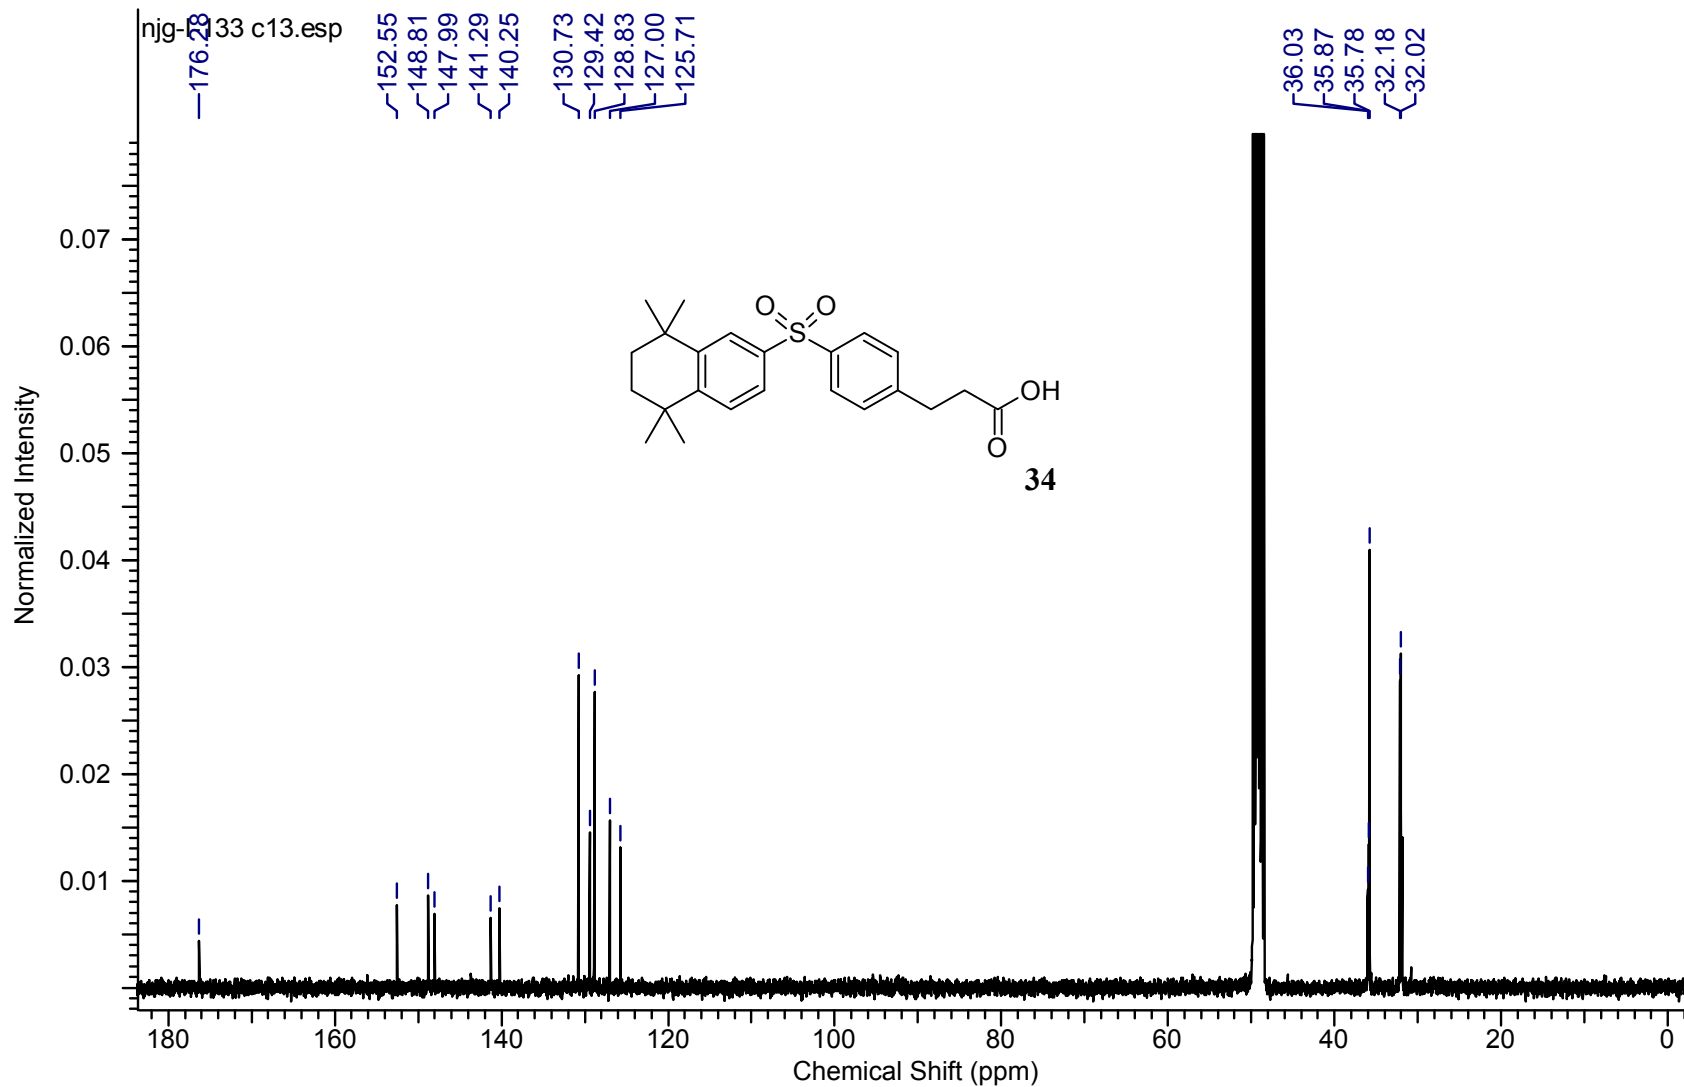

# 400 MHz <sup>1</sup>H-NMR of compound 36a in CDCl<sub>3</sub>

1jg-1006 1h.esp

M08 M05

M07

7.35  
7.34  
7.26  
7.25  
7.23  
7.20

M04

M03

3.69  
3.59

M02

M01

M09

1.67  
1.26  
1.24

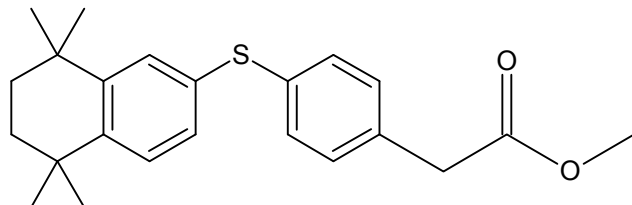

36a

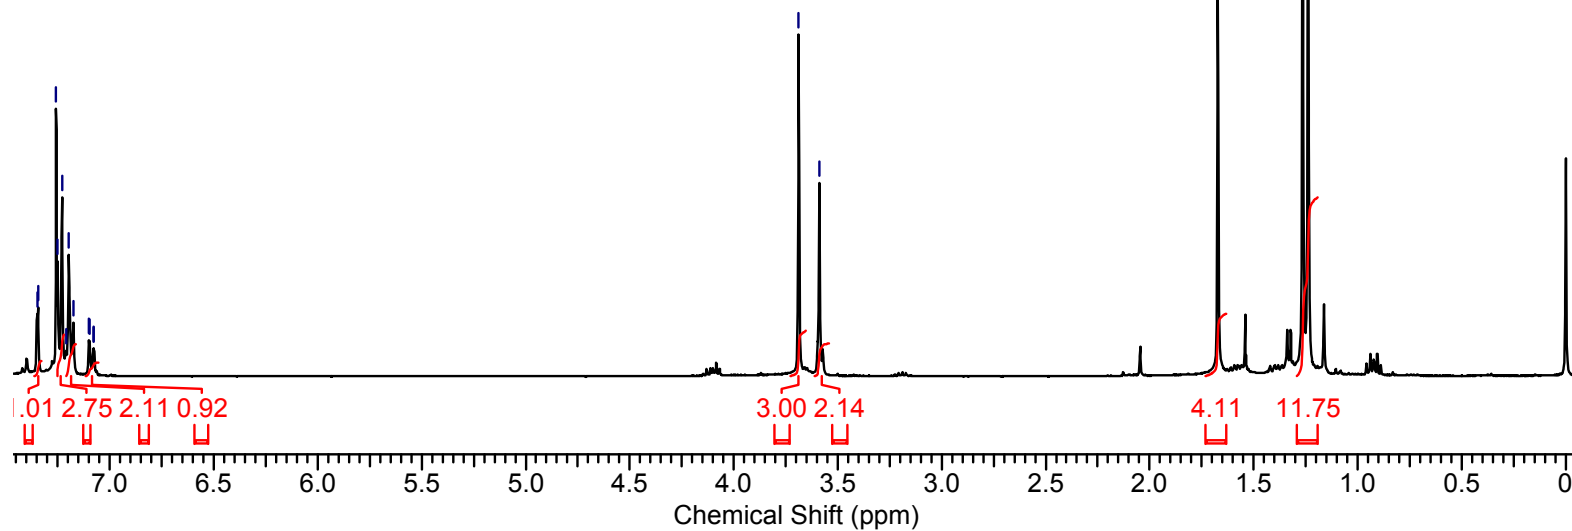

100 MHz <sup>13</sup>C-NMR of compound 36a in CDCl<sub>3</sub>

njg-106 13c.esp

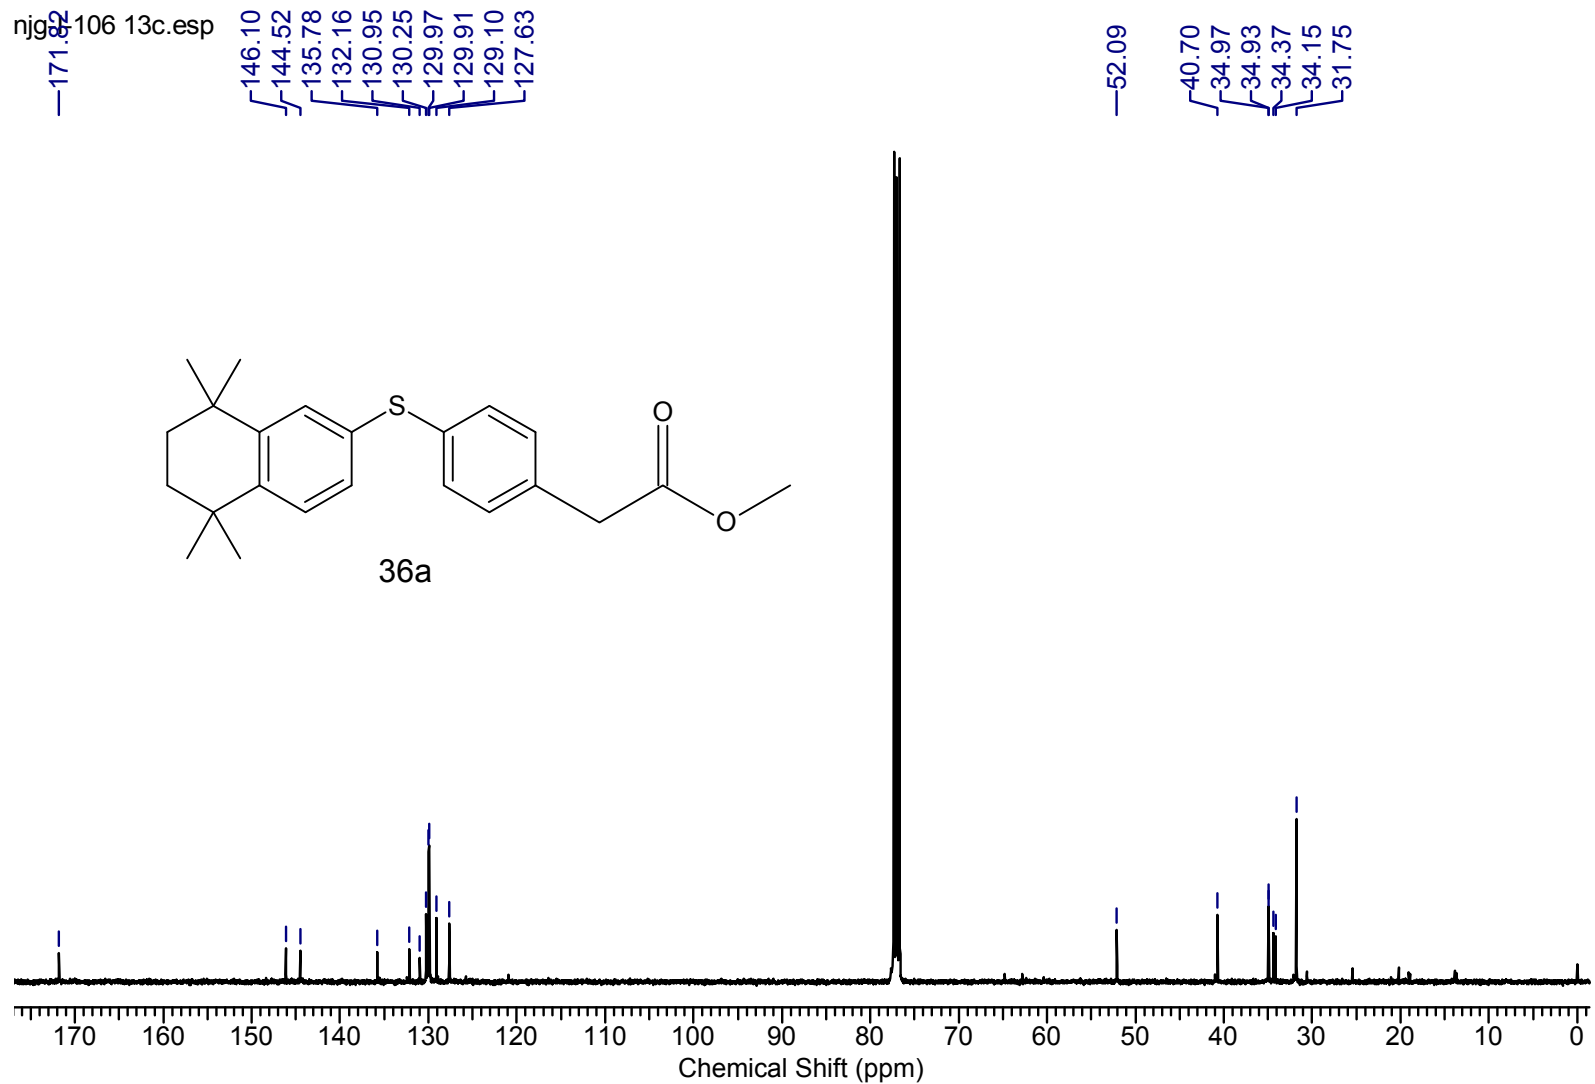

### 400 MHz $^1\text{H-NMR}$ of compound 36b in $\text{CDCl}_3$

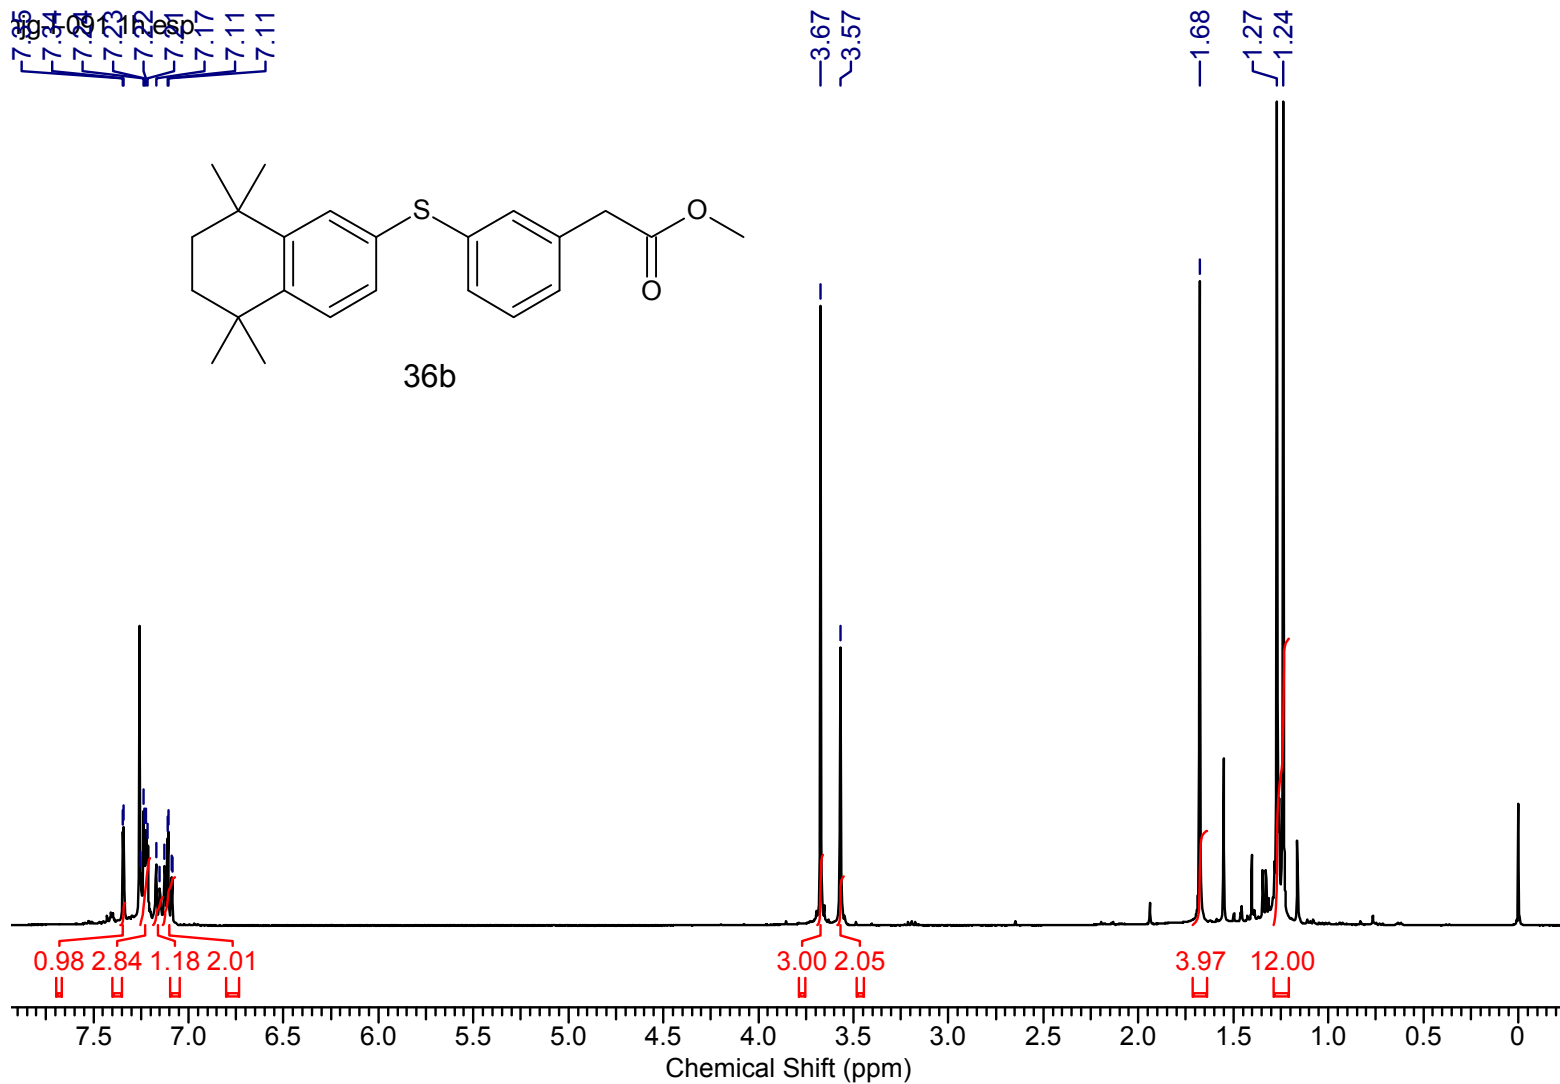

# 100 MHz <sup>13</sup>C-NMR of compound 36b in CDCl<sub>3</sub>

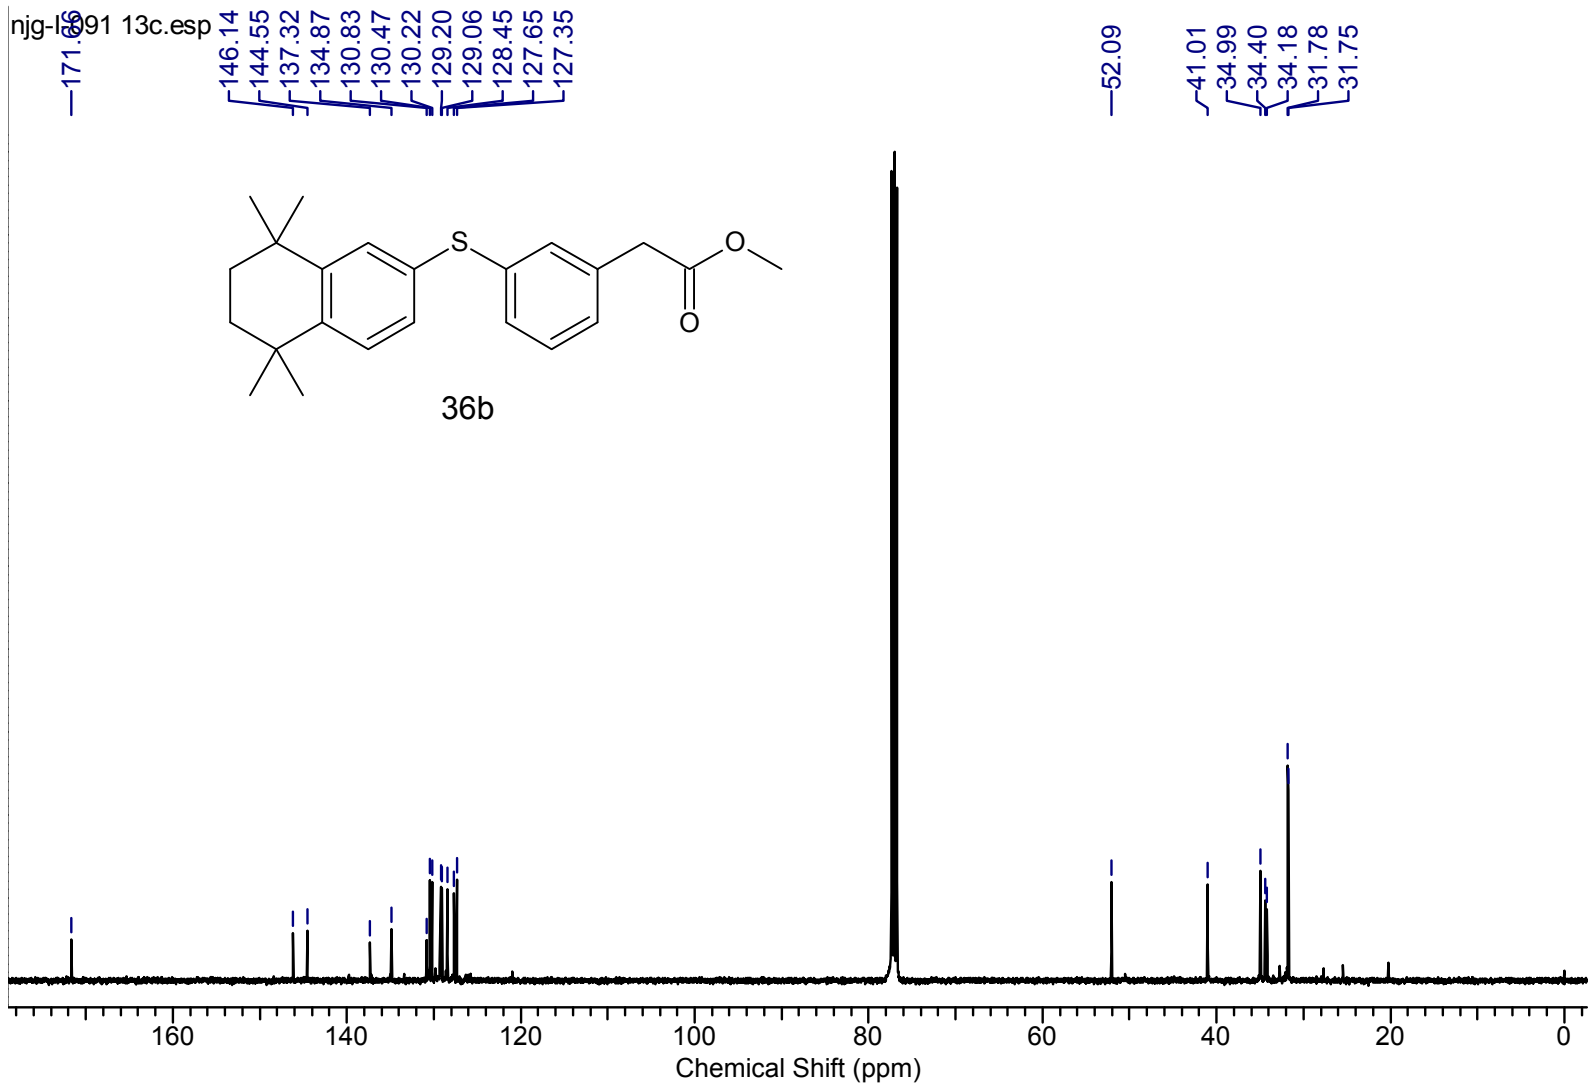

# 400 MHz <sup>1</sup>H-NMR of compound 37a in CDCl<sub>3</sub>

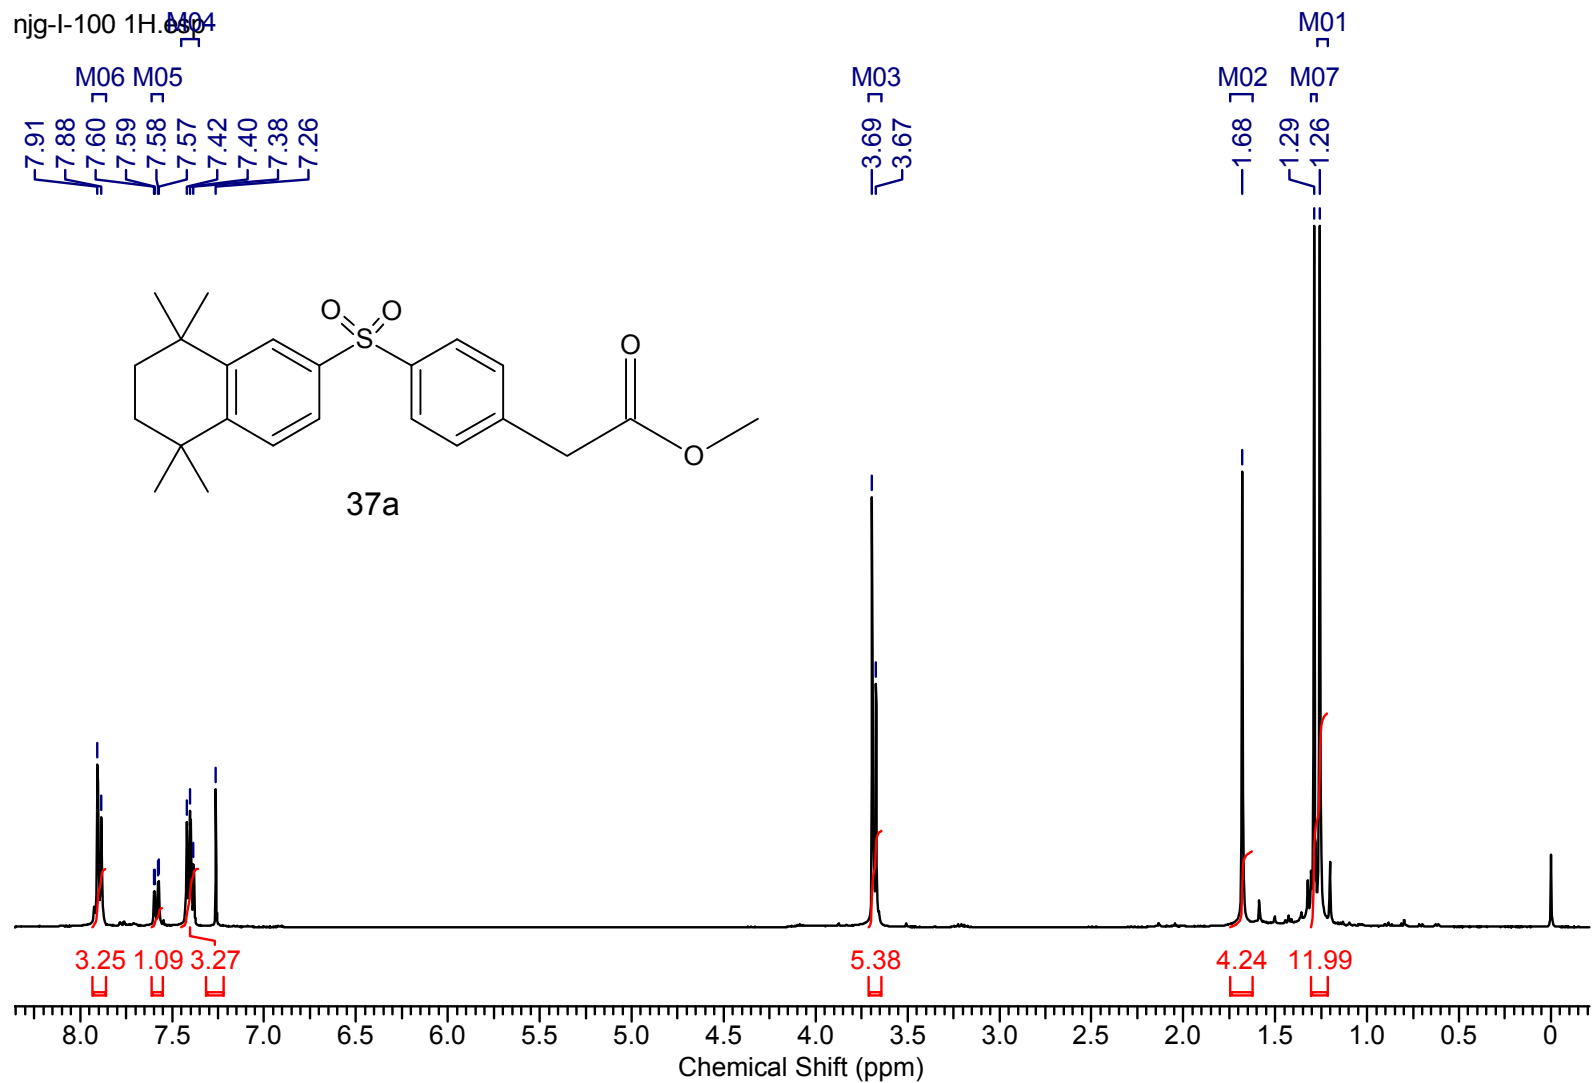



# 100 MHz <sup>13</sup>C-NMR of compound 37a in CDCl<sub>3</sub>

njg-l-10013c.esp

170.99

150.99

146.54

141.05

139.24

138.36

130.29

130.19

127.88

126.00

124.61

52.32

40.84

34.69

34.63

34.58

31.72

31.59

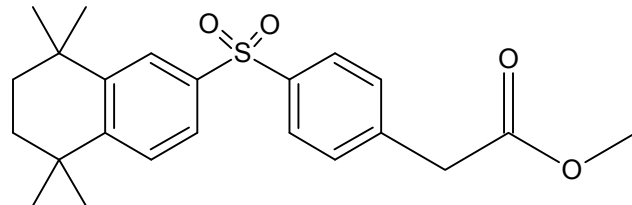

37a

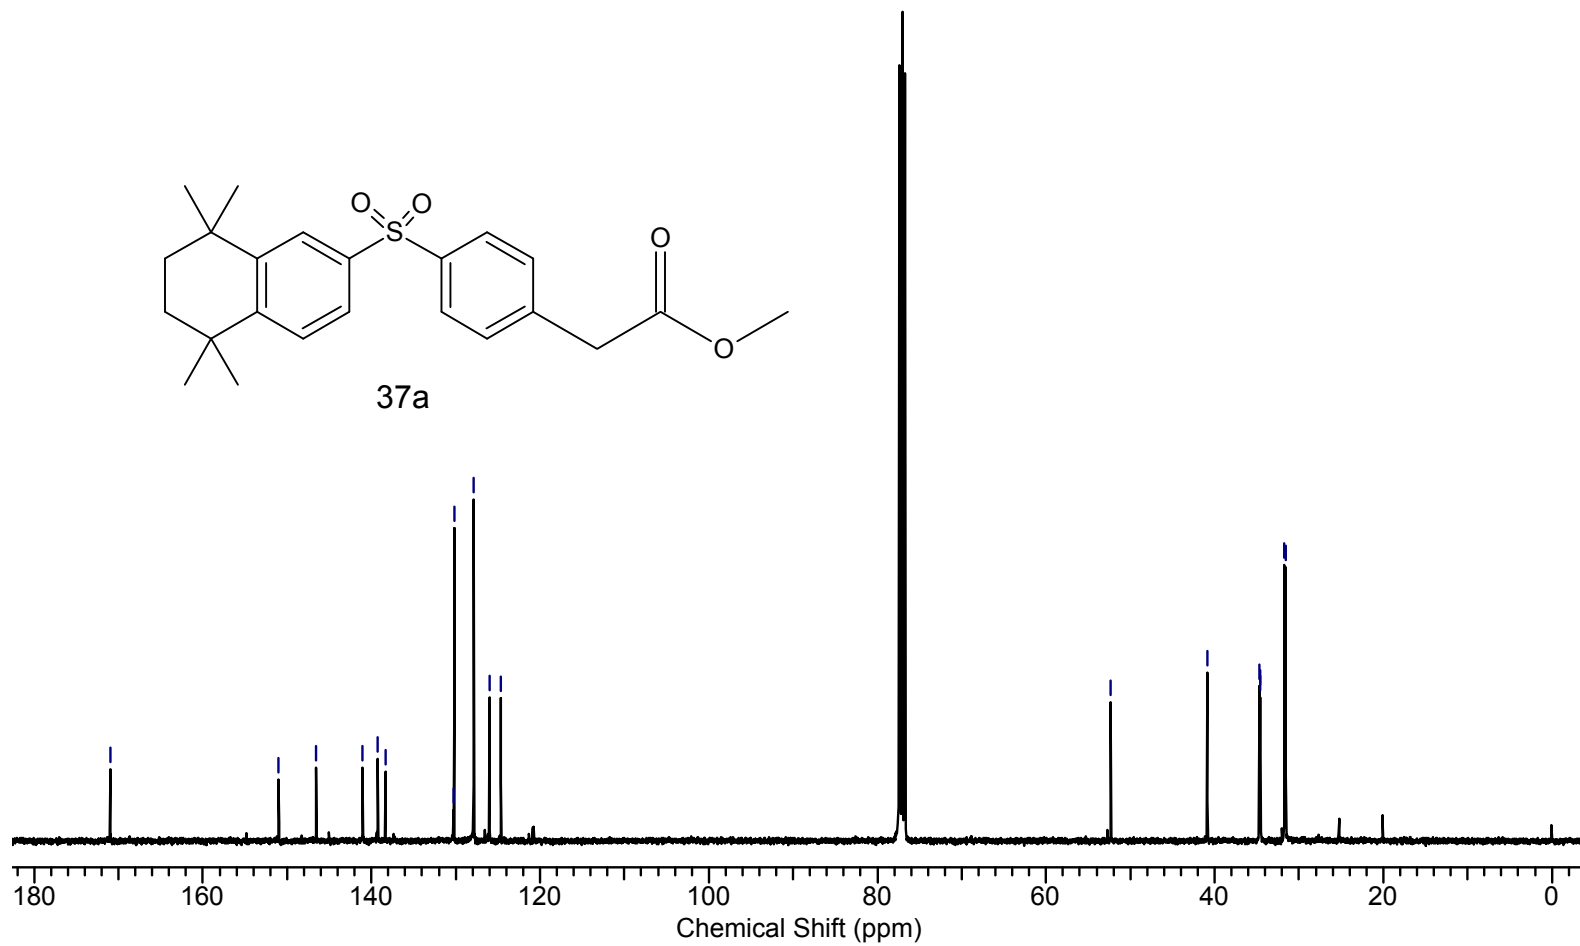

# 400 MHz <sup>1</sup>H-NMR of compound 37b in CDCl<sub>3</sub>

njgM077M05.esp

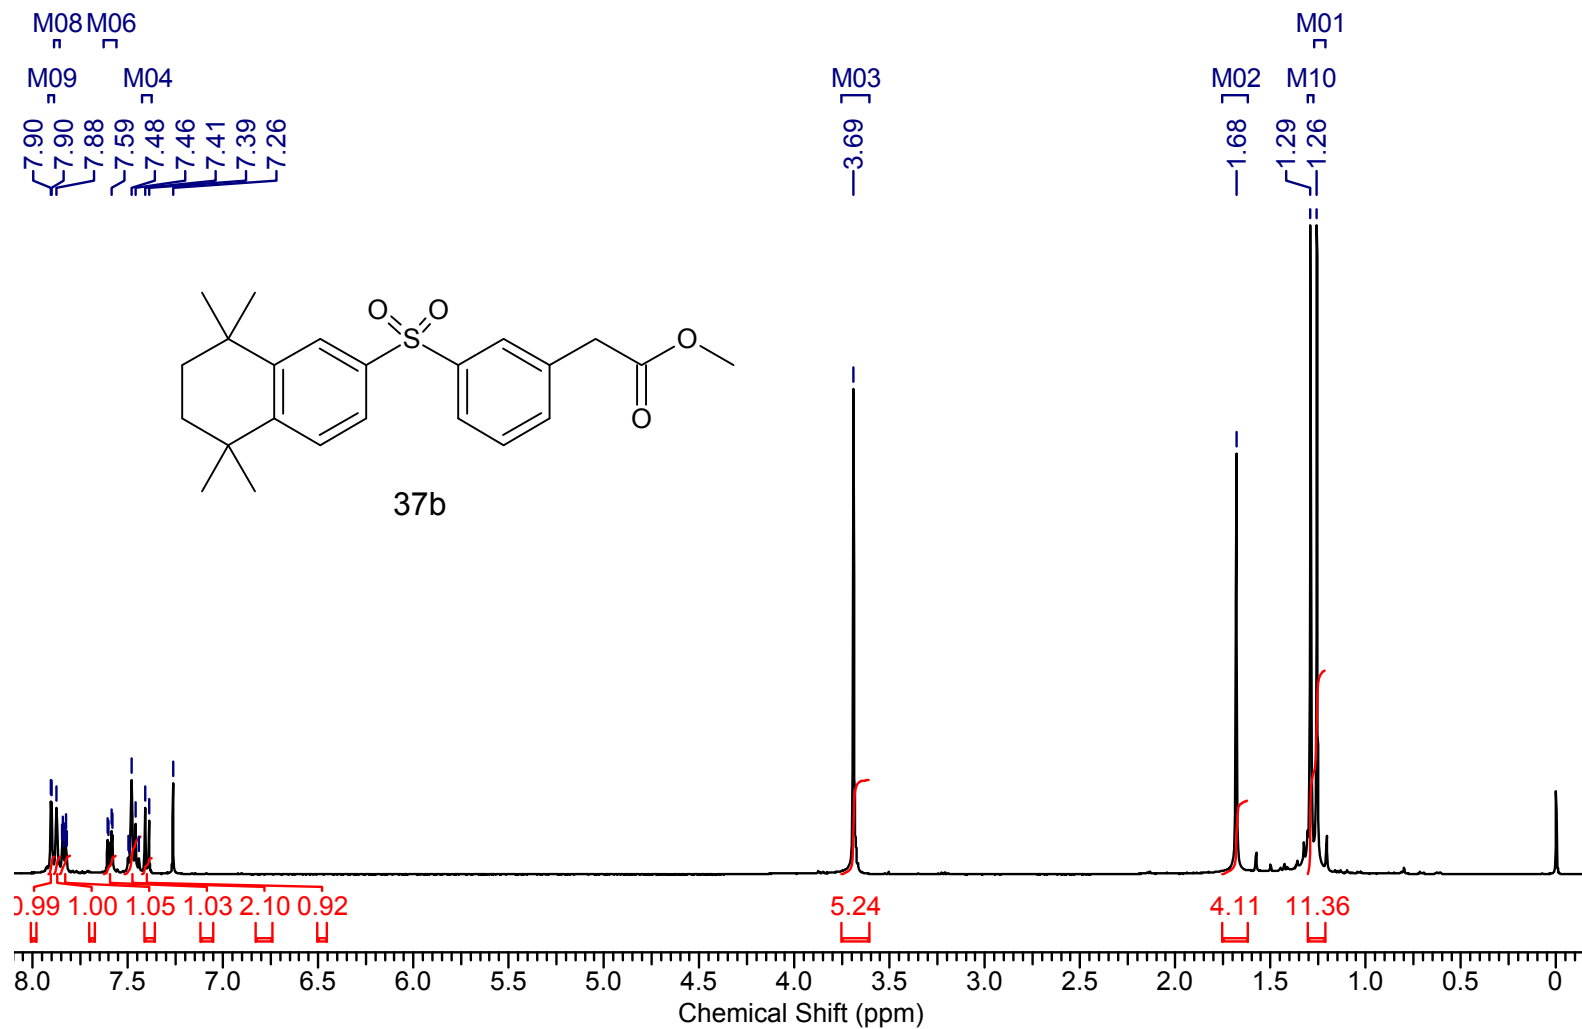

# 100 MHz <sup>13</sup>C-NMR of compound 37b in CDCl<sub>3</sub>

njg-l-009 13c.esp

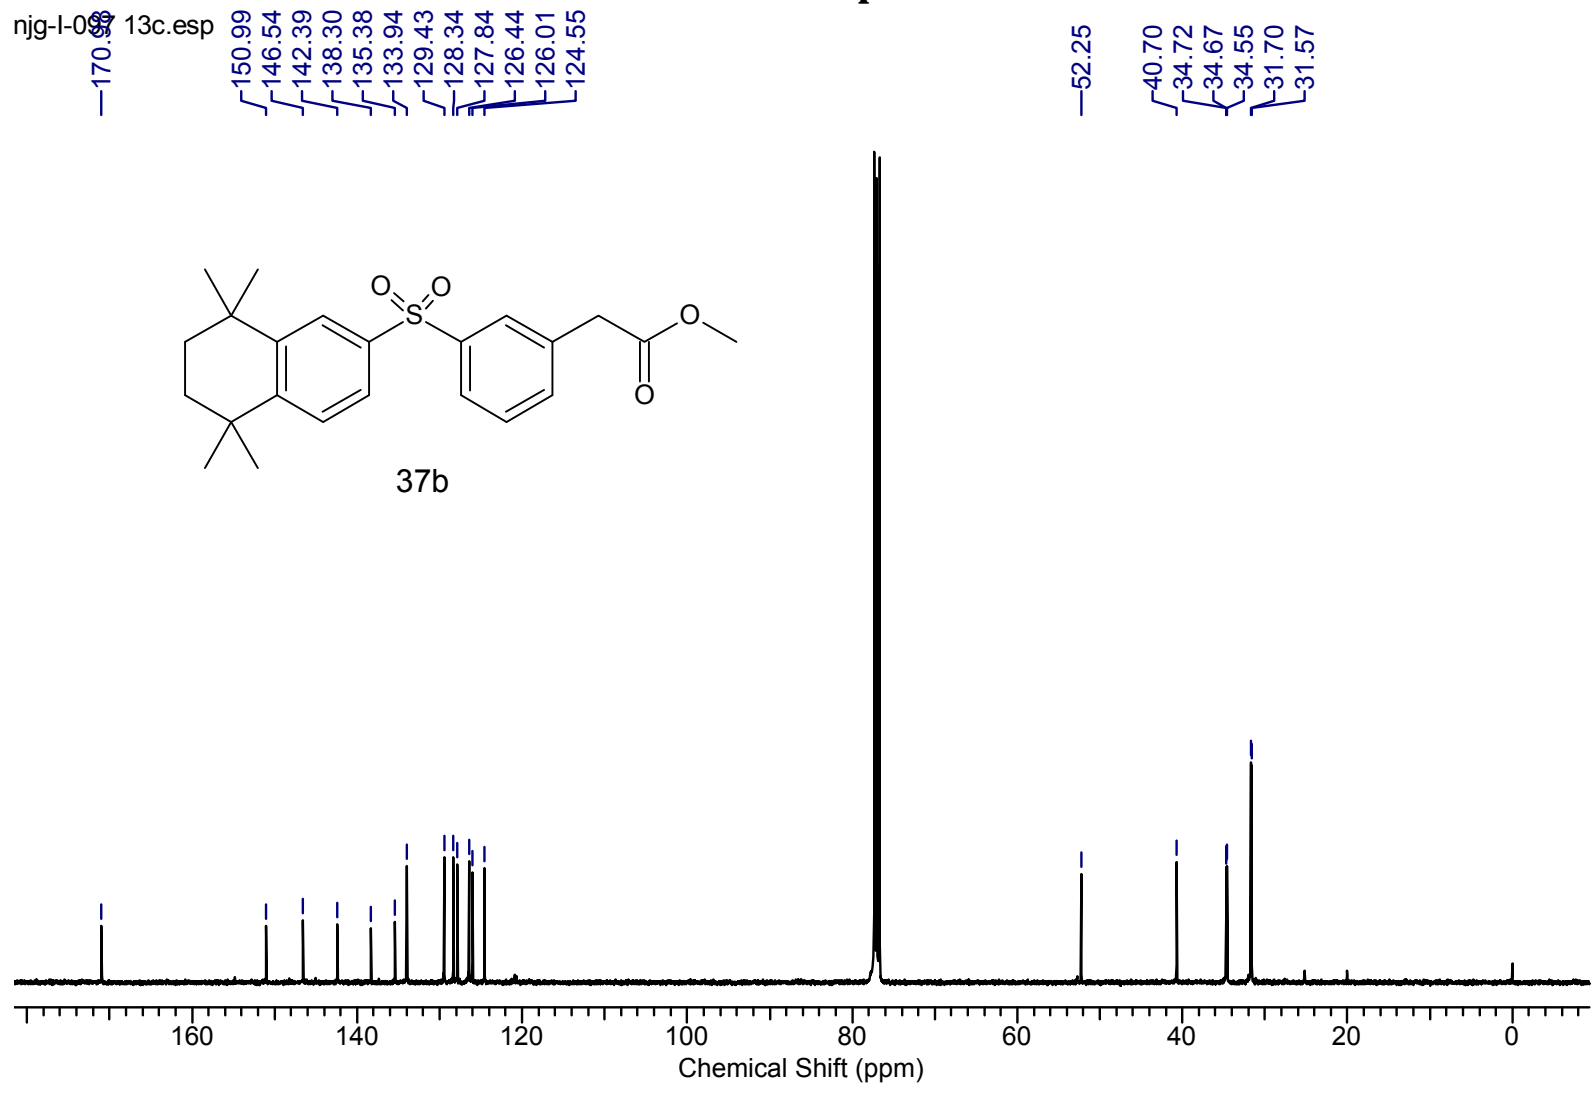

### 400 MHz <sup>1</sup>H-NMR of compound 38a in CDCl<sub>3</sub>

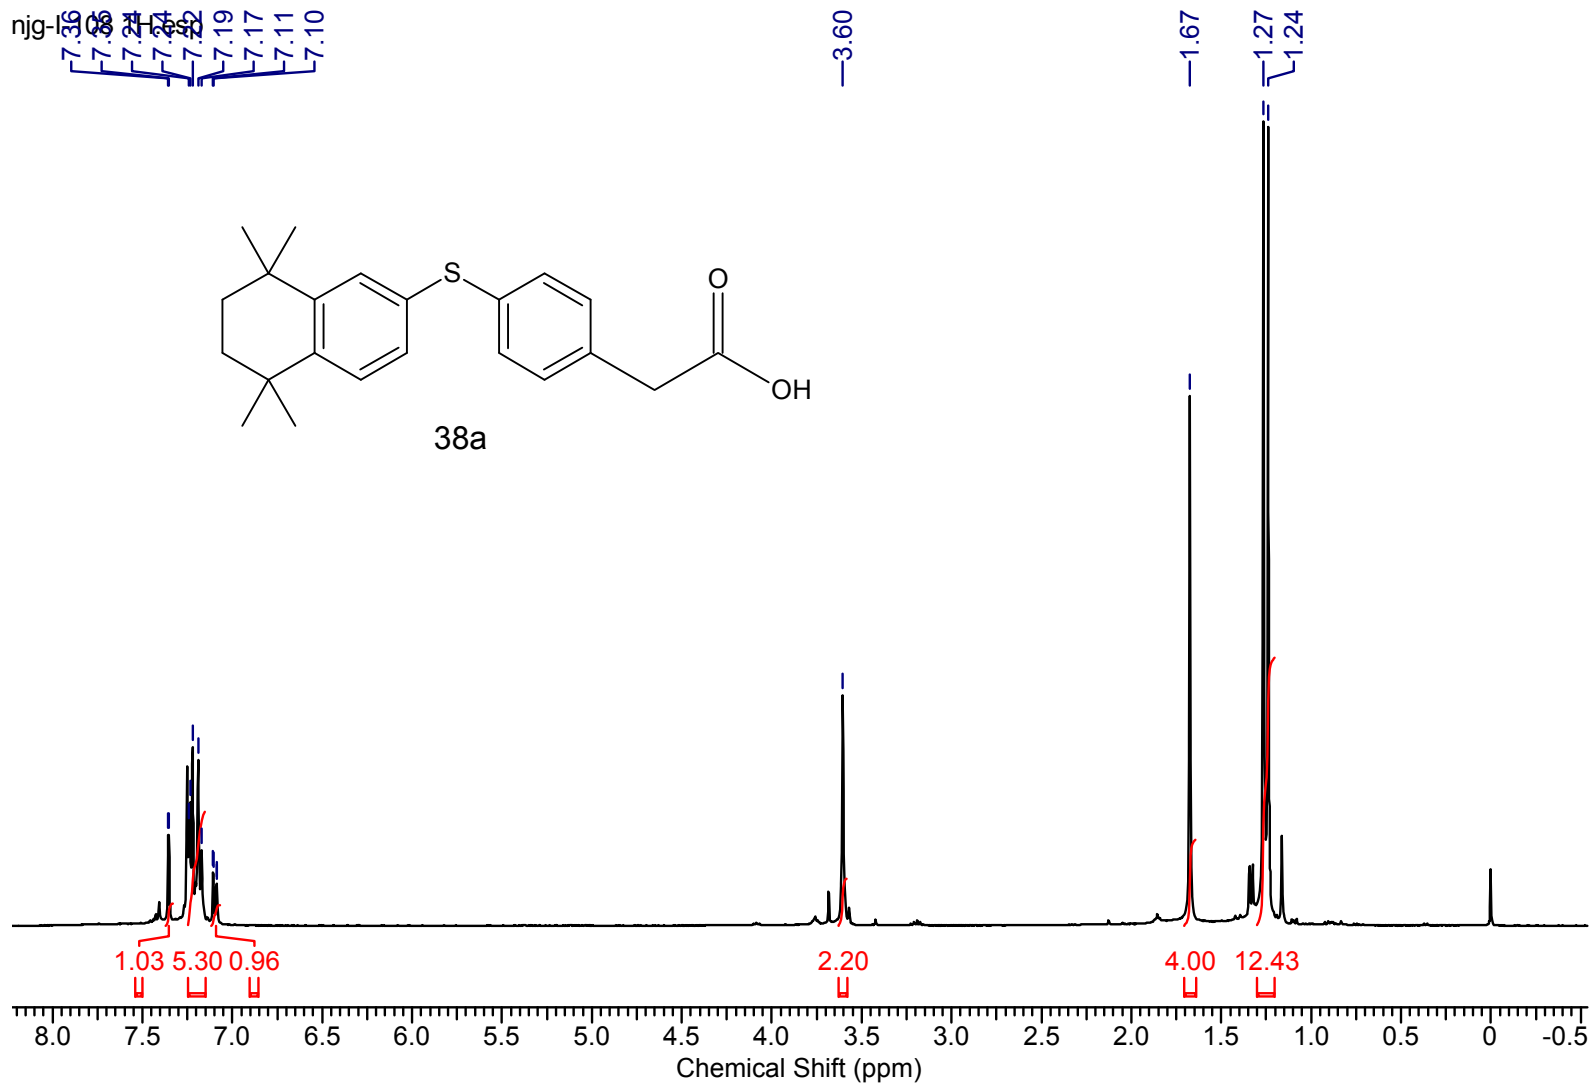

njg-l-108 13C.esp

### 100 MHz <sup>13</sup>C-NMR of compound 38a in CDCl<sub>3</sub>

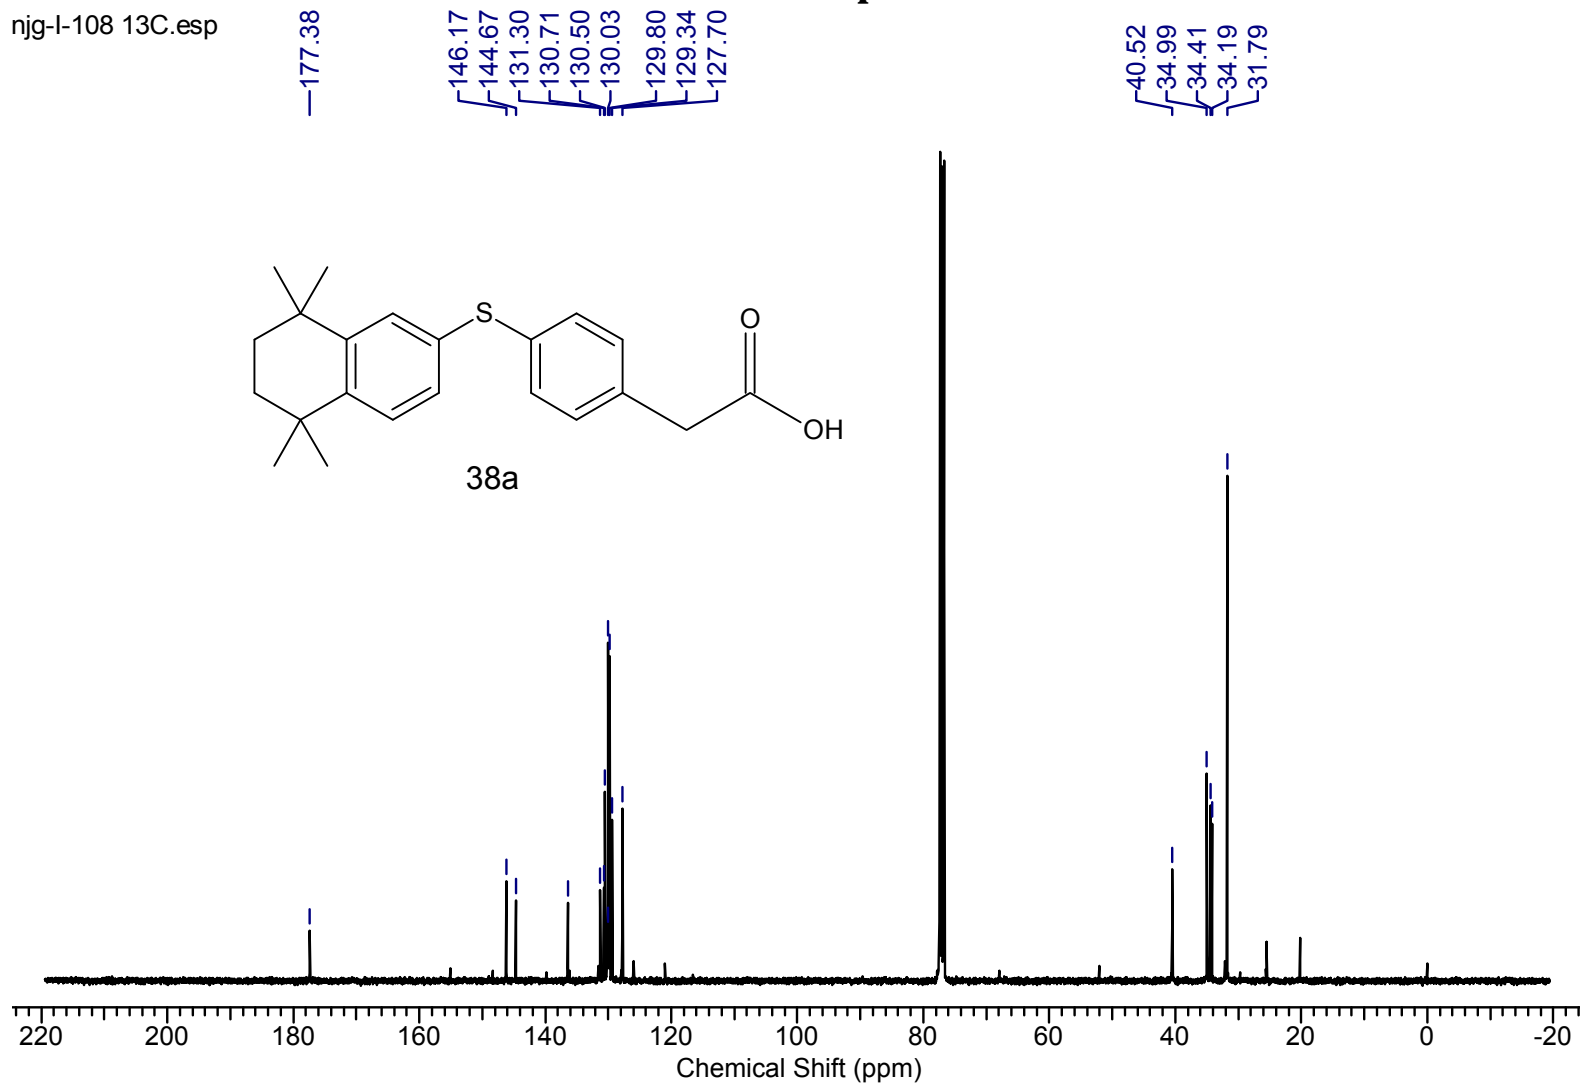

### 400 MHz $^1\text{H}$ -NMR of compound 38b in $\text{CDCl}_3$

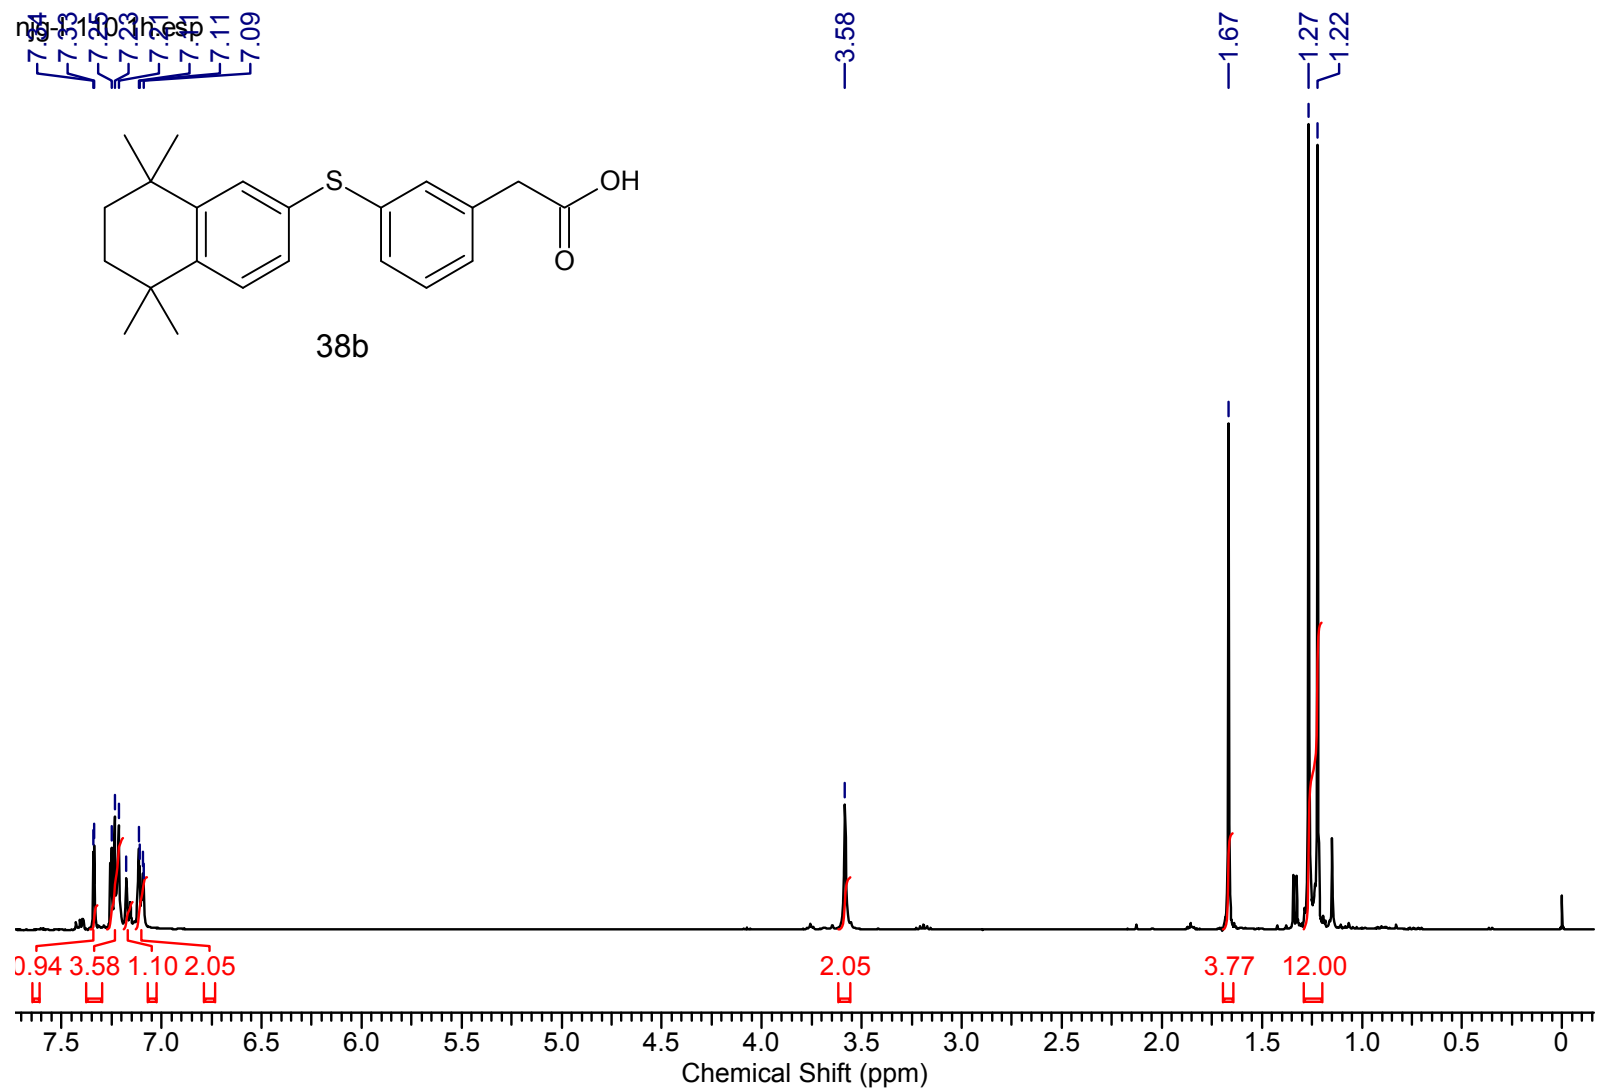

100 MHz <sup>13</sup>C-NMR of compound 38b in CDCl<sub>3</sub>

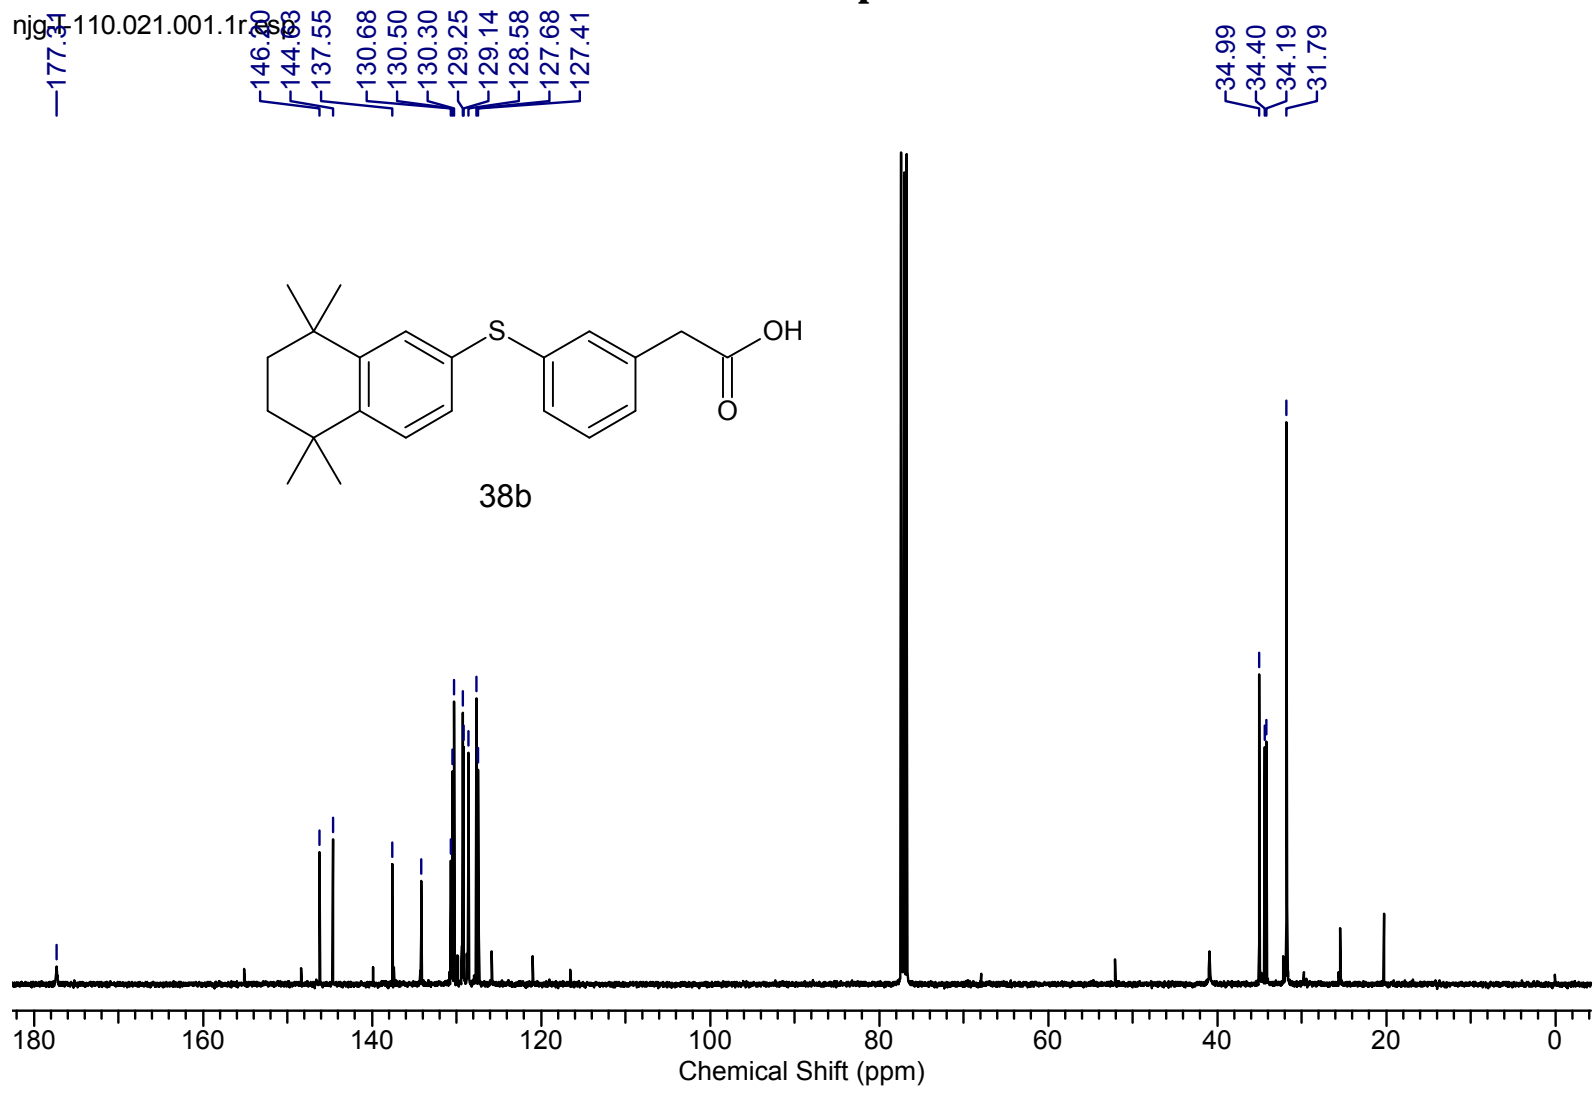

# 400 MHz <sup>1</sup>H-NMR of compound 39a in CDCl<sub>3</sub>

njg-l-104 1h.esp

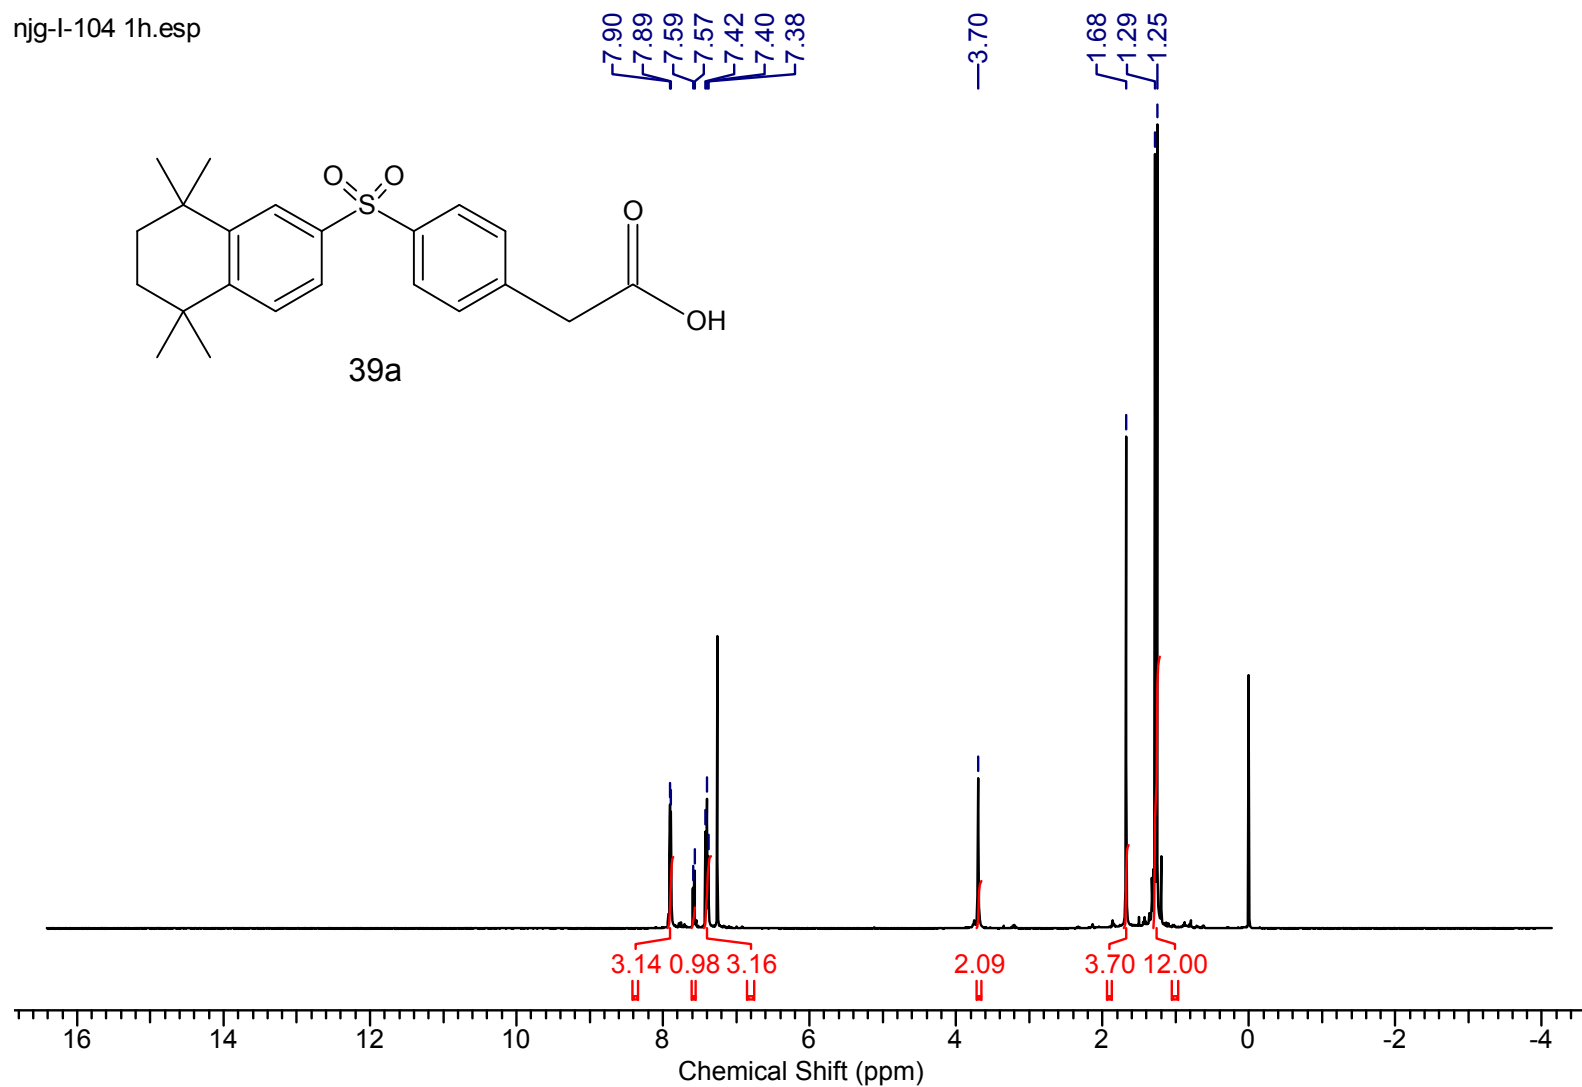



# 100 MHz <sup>13</sup>C-NMR of compound 39a in CDCl<sub>3</sub>

1jg-l-104 13c.esp

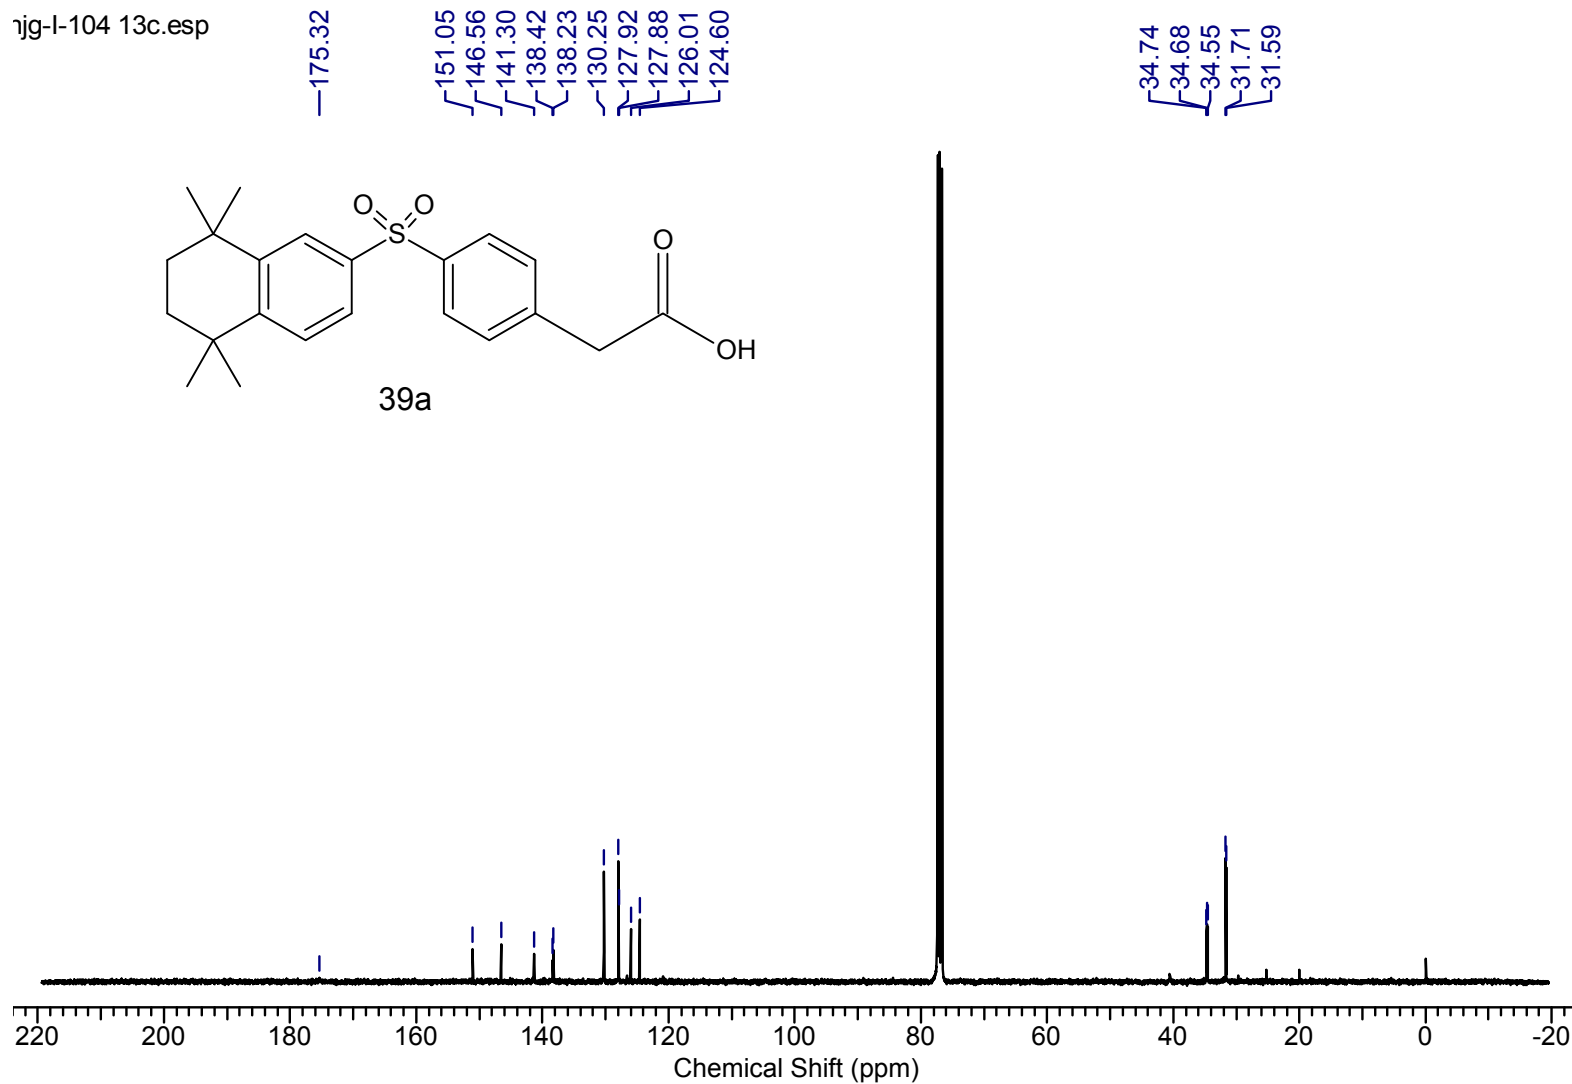

# 400 MHz <sup>1</sup>H-NMR of compound 39b in CDCl<sub>3</sub>

njg-l-099 1h.esp

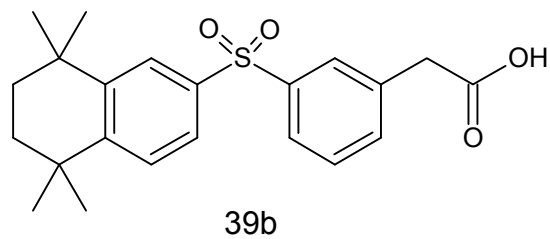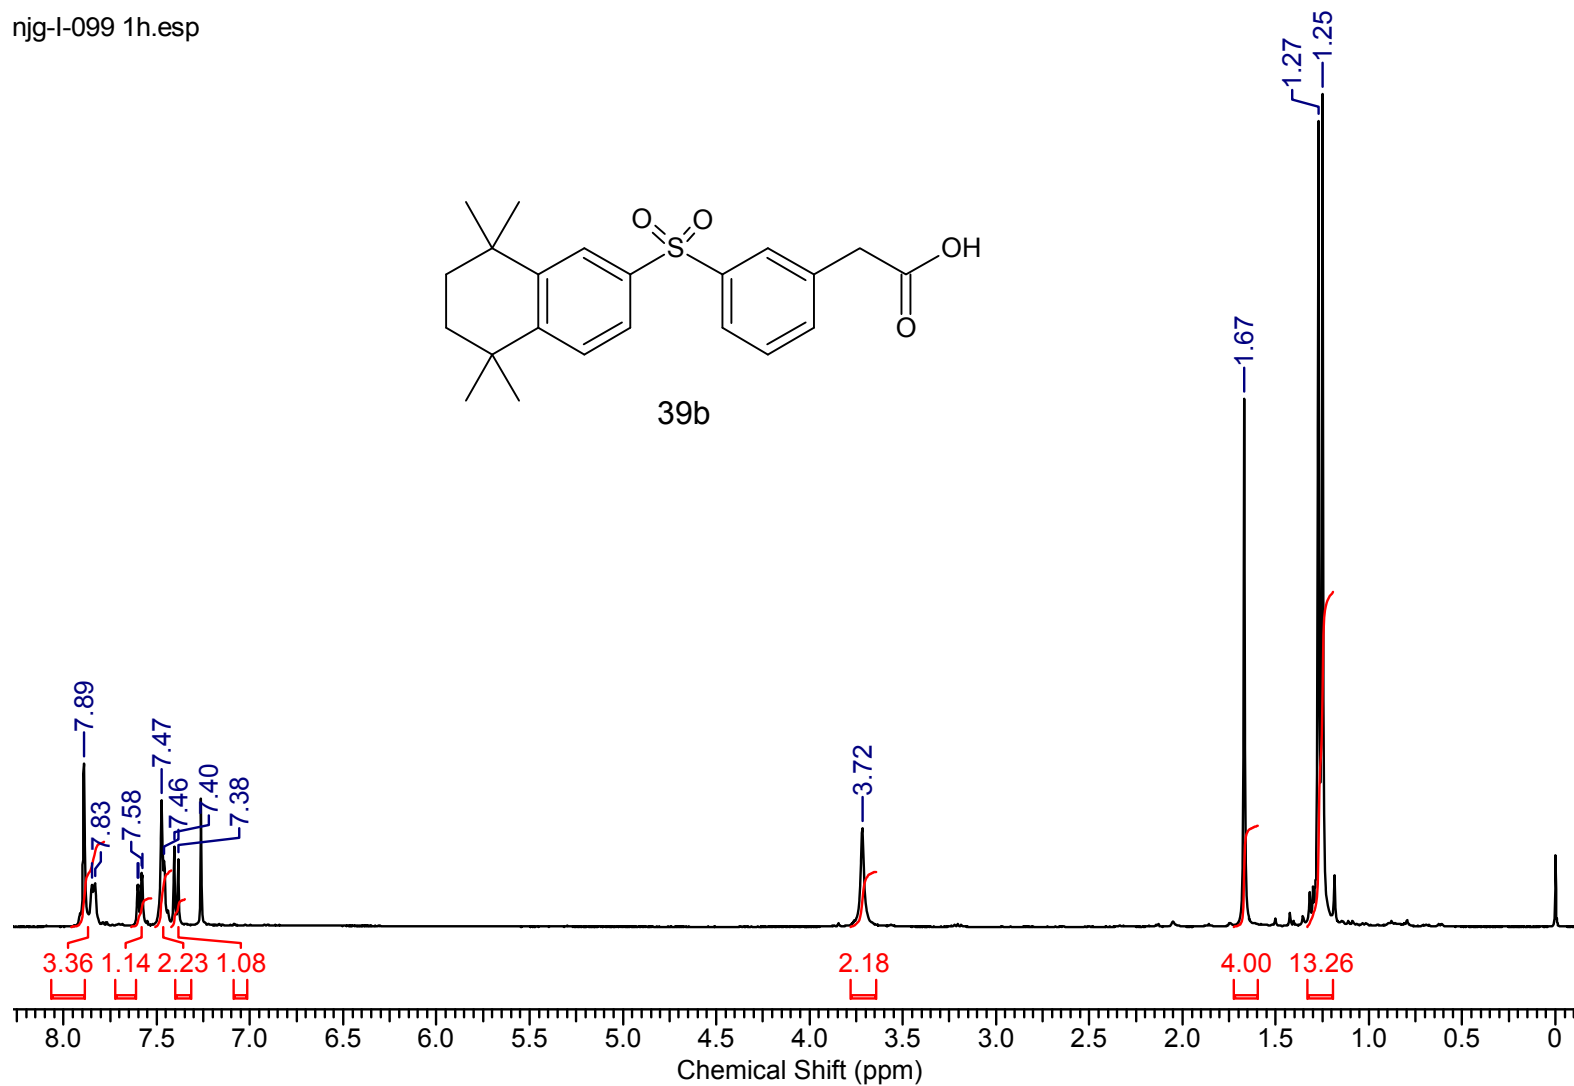

# 100 MHz <sup>13</sup>C-NMR of compound 39b in CDCl<sub>3</sub>

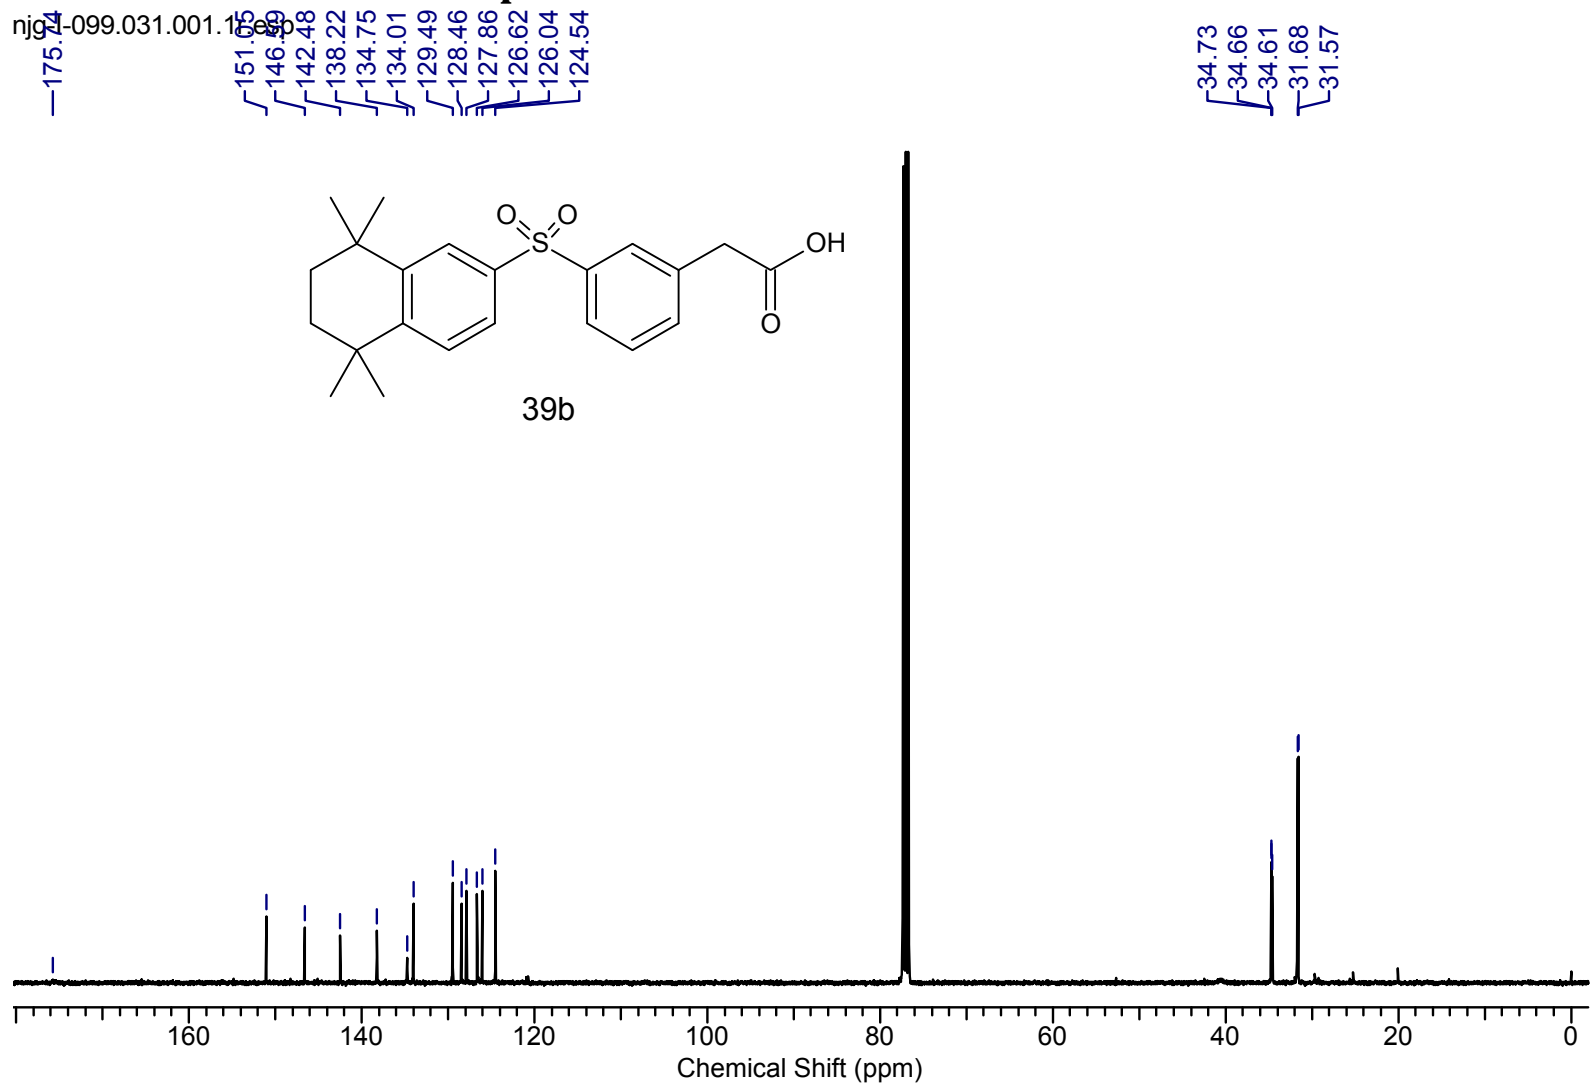

## LC/MS analyses

LC/MS and HRMS analyses were obtained on a Waters ACQUITY UPLC-series liquid chromatography system equipped with a diode array detector and coupled to a LCT PREMIER XE™ time of flight (TOF) mass spectrometer with electrospray ionization (ESI). The liquid chromatography conditions were as follows: a Phenomenex column (NX, 3u, C18, 110A, 50.0x4.60 mm) was used, and it was eluted with the following gradient over 15 minutes at a rate of 0.4mL/min: solvent A: water (0.1% formic acid), solvent B: acetonitrile.

| <u>Time (min)</u> | <u>Flow (mL/min)</u> | <u>%A</u> | <u>%B</u> |
|-------------------|----------------------|-----------|-----------|
| 0.00              | 0.400                | 90.0      | 10.0      |
| 6.60              | 0.400                | 2.0       | 98.0      |
| 13.00             | 0.400                | 2.0       | 98.0      |
| 14.00             | 0.400                | 90.0      | 10.0      |
| 15.00             | 0.400                | 90.0      | 10.0      |

Compound purity was assigned on the basis of 254-nM detection data assessed by comparing relative peak areas of the signals.

| Compound   | Retention Time (min) | Purity (%) |
|------------|----------------------|------------|
| 5          | 8.12                 | 96         |
| 6          | 8.34                 | 97         |
| <b>9</b>   | 8.14                 | 95         |
| <b>11a</b> | 8.82                 | 100        |
| <b>13a</b> | 8.85                 | 98         |
| <b>15a</b> | 9.35                 | 95         |
| <b>11b</b> | 9.40                 | 95         |
| <b>13b</b> | 7.74                 | 95         |
| <b>15b</b> | 9.97                 | 94         |
| <b>18</b>  | 10.06                | 80         |
| <b>20</b>  | 9.83                 | 93         |
| <b>22</b>  | 9.60                 | 100        |
| <b>24</b>  | 9.13                 | 99         |
| <b>26</b>  | 8.96                 | 99         |
| <b>28</b>  | 10.02                | 100        |
| <b>30</b>  | 9.67                 | 99         |
| <b>34</b>  | 8.44                 | 99         |
| <b>38a</b> | 9.50                 | 95         |
| <b>38b</b> | 9.45                 | 95         |
| <b>39a</b> | 8.32                 | 99         |
| <b>39b</b> | 8.27                 | 99         |
